# Supplementary material for: Electrochemical annulation of 1,2,3-benzotriazinones with alkynes to access isoquinolin-1(2H)-ones
Source: Royal Society of Chemistry journal article supplement (doi:10.1039/d3ob01161e), 2023-01-01

## *Supporting information*

### **Metal-free electrochemistry promoted denitrogenative [4+2] annulation of 1,2,3-benzotriazinones with alkynes**

Jinkang Chen,<sup>a,\*</sup> LinXia Xiao,<sup>a</sup> Liang Qi<sup>a,\*</sup>

<sup>a</sup> College of Pharmaceutical Sciences, Jiangsu Vocational College of Medicine, Yancheng 224000,  
China

#### **Table of Contents**

|                                                                                            |           |
|--------------------------------------------------------------------------------------------|-----------|
| <b>1. General Information.....</b>                                                         | <b>2</b>  |
| <b>2. General Procedure for the Synthesis of 1,2,3-benzotriazin-4(3<i>H</i>)-ones.....</b> | <b>2</b>  |
| <b>3. Experimental Section.....</b>                                                        | <b>2</b>  |
| <b>4. General Procedure for the Synthesis of Products 3.....</b>                           | <b>7</b>  |
| <b>5. Characterization Data of the Product.....</b>                                        | <b>8</b>  |
| <b>6. References.....</b>                                                                  | <b>19</b> |
| <b>7. <sup>1</sup>H and <sup>13</sup>C Spectrums of Compounds.....</b>                     | <b>19</b> |

## 1. General Information

Unless otherwise noted, all reactions were carried out without exclusion of air or moisture. Commercial solvents and reagents were used without further purification. Analytical thin layer chromatography (TLC) was performed using silica gel GF254 plates. Column chromatography was performed using silica gel (300-400 mesh) eluting with petroleum ether and ethyl acetate. Nuclear magnetic resonance spectra ( $^1\text{H}$  NMR,  $^{13}\text{C}$  NMR and  $^{19}\text{F}$  NMR) were recorded with a Bruker Magnet system 400' 54 Ascend ( $^1\text{H}$  at 400 MHz,  $^{13}\text{C}$  at 100 MHz and  $^{19}\text{F}$  at 376 MHz). Unless otherwise noted, all spectra were acquired in  $\text{CDCl}_3$ . Chemical shifts are reported in parts per million (ppm,  $\delta$ ), downfield from tetramethylsilane (TMS,  $\delta = 0.00$  ppm) and are referenced to residual solvent ( $\text{CDCl}_3$ ,  $\delta = 7.26$  ppm ( $^1\text{H}$ ), 77.0 ppm ( $^{13}\text{C}$ )). Coupling constants were reported in hertz (Hz). High-resolution mass spectrometry was performed on an Agilent 1290-6540 UHPLC Q-ToF HR-MS System ESI spectrometer.

## 2. General Procedure for the Synthesis of 1,2,3-benzotriazin-4(3H)-ones <sup>[1]</sup>

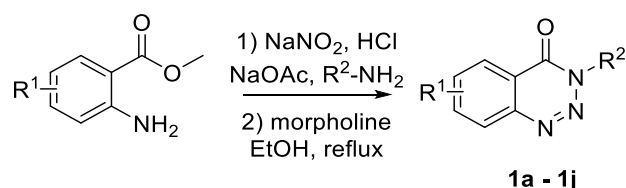

To a mixture of methyl anthranilate (10 mmol, 1.0 equiv) in  $\text{HCl}$  (con., 2.5 mL) was drop-wise added a solution of  $\text{NaNO}_2$  (11 mmol, 1.1 equiv) in water (5 mL) at  $0^\circ\text{C}$ . The resulting solution was stirred for 30 min. Then, a solution of  $\text{NaOAc}$  (38 mmol, 3.8 equiv) in water (10 mL) was slowly added followed by addition of aryl amine (15 mmol, 1.5 equiv) at  $0^\circ\text{C}$ . The resulting mixture was stirred at  $0^\circ\text{C}$  for 5 h. The precipitate was collected by filtration, washed with cold water (50 mL), and purified by recrystallization from ethanol to afford triazene. The above triazene and morpholine (2.70 g, 30 mmol, 3.0 equiv.) were refluxed (oil bath) in ethanol (100 mL) until triazene was completely consumed by TLC. The reaction mixture was cooled to afford 1,2,3-benzotriazinones via crystallization.

## 3. Experimental Section

1) Conditions optimizing

**Table SI-1** Optimization of electrolytes and solvents<sup>a</sup>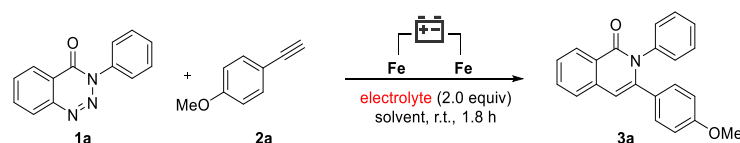

| entry | electrolytes                                   | solvent                      | yield <sup>b</sup> |
|-------|------------------------------------------------|------------------------------|--------------------|
| 1     | <sup>n</sup> Bu <sub>4</sub> NBF <sub>4</sub>  | DMSO                         | 44                 |
| 2     | <sup>n</sup> Bu <sub>4</sub> NBF <sub>4</sub>  | DMF                          | trace              |
| 4     | <sup>n</sup> Bu <sub>4</sub> NBF <sub>4</sub>  | MeCN                         | 42                 |
| 6     | <sup>n</sup> Bu <sub>4</sub> NBF <sub>4</sub>  | THF                          | 22                 |
| 7     | <sup>n</sup> Bu <sub>4</sub> NBF <sub>4</sub>  | 1,4-dioxane                  | trace              |
| 8     | <sup>n</sup> Bu <sub>4</sub> NBF <sub>4</sub>  | HFIP                         | Trace              |
| 14    | <sup>n</sup> Bu <sub>4</sub> NBF <sub>4</sub>  | DMSO:H <sub>2</sub> O = 40:1 | 55                 |
| 15    | <sup>n</sup> Bu <sub>4</sub> NBF <sub>4</sub>  | DMSO:H <sub>2</sub> O = 20:1 | 68                 |
| 16    | <sup>n</sup> Bu <sub>4</sub> NBF <sub>4</sub>  | DMSO:H <sub>2</sub> O = 10:1 | 70                 |
| 17    | <sup>n</sup> Bu <sub>4</sub> NBF <sub>4</sub>  | DMSO:H <sub>2</sub> O = 8:1  | 78                 |
| 18    | <sup>n</sup> Bu <sub>4</sub> NBF <sub>4</sub>  | DMSO:H <sub>2</sub> O = 8:1  | 64 <sup>c</sup>    |
| 19    | <sup>n</sup> Bu <sub>4</sub> NBF <sub>4</sub>  | DMSO:H <sub>2</sub> O = 8:1  | 67 <sup>d</sup>    |
|       | <sup>n</sup> Bu <sub>4</sub> NPF <sub>6</sub>  | DMSO:H <sub>2</sub> O = 8:1  | 51                 |
| 9     | <sup>n</sup> Bu <sub>4</sub> NCIO <sub>4</sub> | DMSO:H <sub>2</sub> O = 8:1  | 62                 |
| 10    | <sup>n</sup> Bu <sub>4</sub> NOAc              | DMSO:H <sub>2</sub> O = 8:1  | 36                 |
| 11    | KPF <sub>6</sub>                               | DMSO:H <sub>2</sub> O = 8:1  | 0                  |
| 13    | <sup>n</sup> Bu <sub>4</sub> NBr               | DMSO                         | 41                 |
| 14    | <sup>n</sup> Bu <sub>4</sub> NBF <sub>4</sub>  | DMSO:H <sub>2</sub> O = 8:1  | 62 <sup>e</sup>    |

<sup>a</sup>Reaction conditions: **1a** (0.2 mmol), **2a** (0.4 mmol), electrolytes (2.0 equiv), solvent (4.5 mL), 10 mA, 1.8 h (3.4 F/mol), under Air. <sup>b</sup> Isolated yields. <sup>c</sup> 5 mA, 3.6 h was used. <sup>d</sup> 20 mA, 0.9 h. <sup>e</sup> DIPEA (2.0 equiv) was used.

**Table SI-2** Optimization of electrodes<sup>a</sup>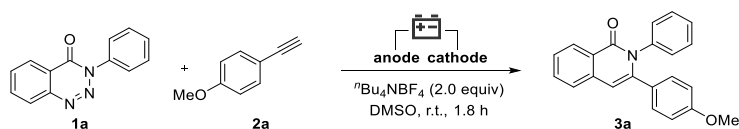

| entry | anode | cathode      | yield <sup>b</sup> |
|-------|-------|--------------|--------------------|
| 1     | Fe    | Graphite rod | 42                 |
| 2     | Pt    | Fe           | 39                 |
| 3     | Fe    | Pt           | 49                 |

<sup>a</sup>Reaction conditions: **1a** (0.2 mmol), **2a** (0.4 mmol), <sup>n</sup>Bu<sub>4</sub>NBF<sub>4</sub> (0.4 mmol), DMSO:H<sub>2</sub>O = 8:1 (4.5 mL), 10 mA, 1.8 h (3.4 F/mol), under Air. <sup>b</sup> Isolated yields.

## 2) Mechanism Studies

### (1) radical trapping experiments

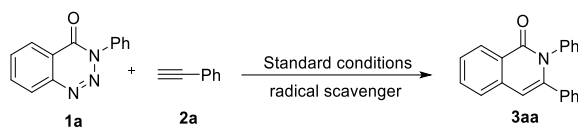

| entry | radical scavenger | yield |
|-------|-------------------|-------|
| 1     | TEMPO (2.0 equiv) | -     |
| 2     | BHT (2.0 equiv)   | -     |

A mixture of **1a** (1.0 equiv, 0.2 mmol), **2a** (3 equiv, 0.6 mmol), TEMPO or BHT (2.0 equiv, 0.4 mmol), and  $n\text{Bu}_4\text{NBF}_4$  (0.4 mmol, 2.0 equiv) in mixed DMSO (4.0 mL) and  $\text{H}_2\text{O}$  (0.5 mL) solution was added to a 20 mL oven-dried sealed tube with a magnetic stir bar. Subsequently, the tube was equipped with a Fe plate (anode, 20 mm  $\times$  10 mm  $\times$  0.1 mm) and a Fe plate (cathode, 20 mm  $\times$  10 mm  $\times$  5 mm), the distance between which was approximately 0.8 cm. All operations are performed in air. The constant current (10 mA) electrolysis was then performed at room temperature (Sealed tube) with vigorous stirring 1.8 h. Upon completion, the reaction mixture was poured into 20 mL  $\text{H}_2\text{O}$  and extracted with 50 mL EtOAc for three times. The combined organic layer was washed with 20 mL  $\text{H}_2\text{O}$  for two times and dried over anhydrous  $\text{Na}_2\text{SO}_4$ . Subsequently, the solvent was removed under reduced pressure. The resulting mixture was analyzed by LC-MS. When TEMPO or BHT was present, the corresponding product **3aa** was not detected. Instead, the radical-trapped product **4** could be detected by LC-MS in the presence of TEMPO.

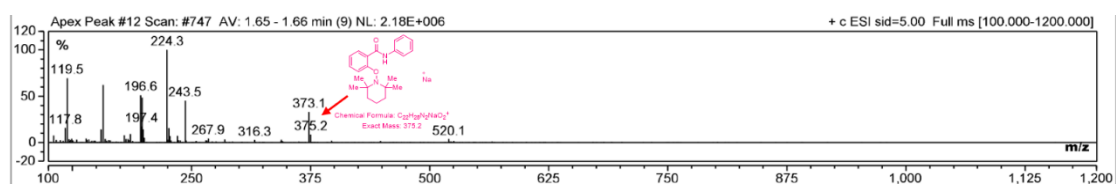

## (2) divided cell experiments

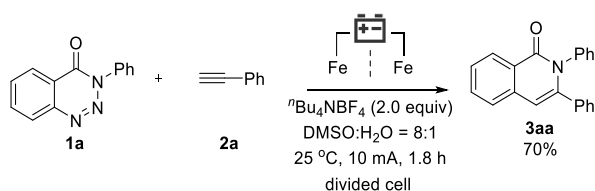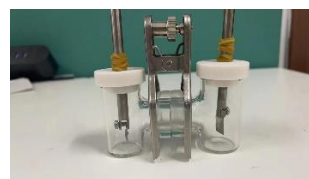

The reaction vessel is an H-type divided electrolytic cell (10 mL+ 10 mL) separated by a hydrogen

ion permeable membranel (Dupont N-117). And this H-type cell was equipped with a Fe anode (20 mm × 10 mm × 0.1 mm ) and a Fe cathode (20 mm × 10 mm × 0.1 mm ) and connected to a direct current (DC) regulated power supply. To the anodic chamber was added <sup>n</sup>Bu<sub>4</sub>NBF<sub>4</sub> (0.4 mmol, 2.0 equiv) in mixed DMSO (4.0 mL) and H<sub>2</sub>O (0.5 mL). To the cathodic chamber was added **1a** (1.0 equiv, 0.2 mmol), **2a** (3 equiv, 0.6 mmol), and <sup>n</sup>Bu<sub>4</sub>NBF<sub>4</sub> (0.4 mmol, 2.0 equiv) in mixed DMSO (4.0 mL) and H<sub>2</sub>O (0.5 mL). The resulting mixture was electrolyzed under constant current conditions (I = 10 mA ) at room temperature for 1.8 h under magnetic stirring (air atmosphere). Upon completion of the reaction, the reaction mixture was poured into 20 mL H<sub>2</sub>O and extracted with 50 mL EtOAc for three times. The combined organic layer was washed with 20 mL H<sub>2</sub>O for two times and dried over anhydrous Na<sub>2</sub>SO<sub>4</sub>. Subsequently, the solvent was removed under reduced pressure. The resulting mixture was purified by chromatography on silica gel with PE/EA (40:1 to 20:1) to give the **3aa** (41.6 mg, 70%).

### (3) CV experiments

The general procedure for cyclic voltammetry experiments: Cyclic voltammetry (CV) experiments were conducted in a 20 mL glass vial fitted with a platinum wire working electrode, a Ag/AgCl reference electrode, and a glassy carbon counter electrode (3 mm in diameter). All measurements were carried out in 20 mL anhydrous DMSO:H<sub>2</sub>O = 8:1 with an electrolyte (<sup>n</sup>Bu<sub>4</sub>NBF<sub>4</sub>, 2.0 equiv), using a scan rate of 100 mV/s.

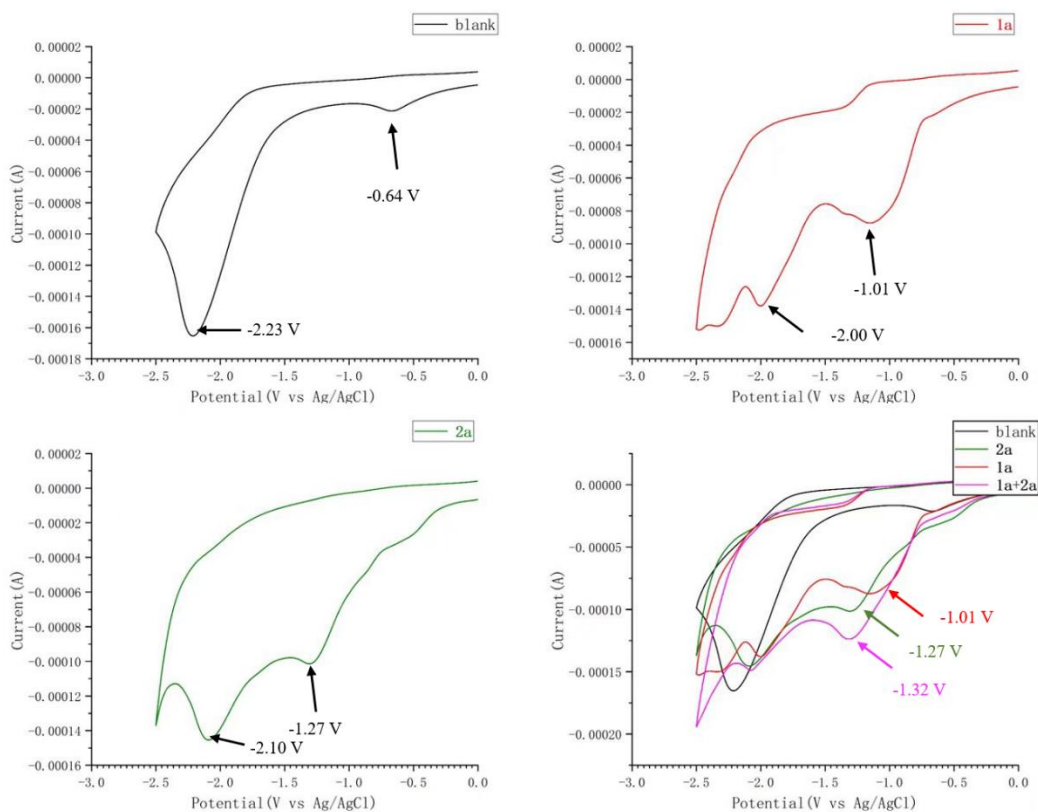

**Figure SI-1** CV experiments of blank, **1a**, **2a**, and **1a+2a** in an electrolyte of  ${}^n\text{Bu}_4\text{NBF}_4$  from -3.0V to 0.0 V at room temperature

(4) intermediate trapping experiments

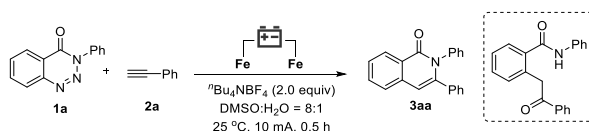

A mixture of **1a** (1.0 equiv, 0.2 mmol), alkyne **2a** (3 equiv, 0.6 mmol), and  ${}^n\text{Bu}_4\text{NBF}_4$  (0.4 mmol, 2.0 equiv) in mixed DMSO (4.0 mL) and  $\text{H}_2\text{O}$  (0.5 mL) solution was added to a 20 mL oven-dried sealed tube with a magnetic stir bar. Subsequently, the tube was equipped with a Fe plate (anode, 20 mm  $\times$  10 mm  $\times$  0.1 mm) and a Fe plate (cathode, 20 mm  $\times$  10 mm  $\times$  5 mm), the distance between which was approximately 0.8 cm. All operations are performed in air. The constant current (10 mA) electrolysis was then performed at room temperature (Sealed tube) with vigorous stirring 0.5 h. Upon completion, the reaction mixture was poured into 20 mL  $\text{H}_2\text{O}$  and extracted with 50 mL

EtOAc for three times. The combined organic layer was washed with 20 mL H<sub>2</sub>O for two times and dried over anhydrous Na<sub>2</sub>SO<sub>4</sub>. Subsequently, the solvent was removed under reduced pressure. The resulting mixture was analyzed by LC-MS, the intermediate could be detected by LC-MS.

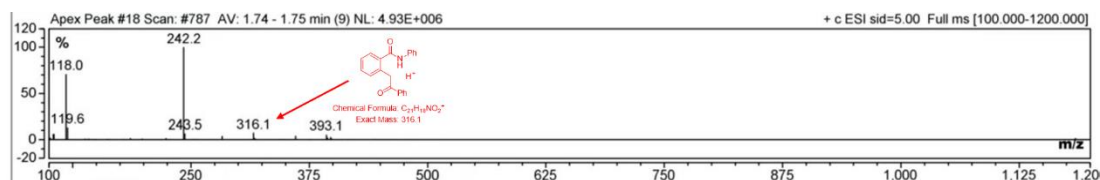

#### 4. General Procedure for the Synthesis of Products 3

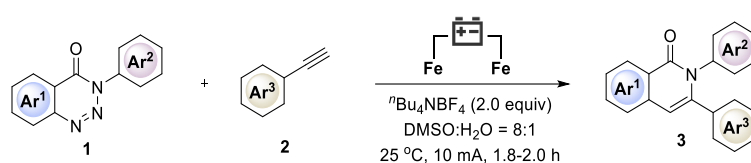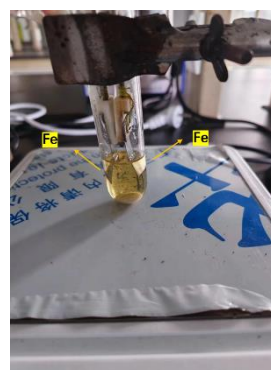

A mixture of **1** (1.0 equiv, 0.2 mmol), alkyne **2** (3 equiv, 0.6 mmol), and  $t\text{Bu}_4\text{NBF}_4$  (0.4 mmol, 2.0 equiv) in mixed DMSO (4.0 mL) and H<sub>2</sub>O (0.5 mL) solution was added to a 20 mL oven-dried sealed tube with a magnetic stir bar. Subsequently, the tube was equipped with a Fe plate (anode, 20 mm × 10 mm × 0.1 mm) and a Fe plate (cathode, 20 mm × 10 mm × 5 mm), the distance between which was approximately 0.8 cm. All operations are performed in air. The constant current (10 mA) electrolysis was then performed at room temperature (Sealed tube) with vigorous stirring 1.8-2.0 h, 3.4-3.7 F/mol. Upon completion, the reaction mixture was poured into 20 mL H<sub>2</sub>O and extracted with 50 mL EtOAc for three times. The combined organic layer was washed with 20 mL H<sub>2</sub>O for two times and dried over anhydrous Na<sub>2</sub>SO<sub>4</sub>. Subsequently, the solvent was removed under reduced pressure. The resulting mixture was purified by chromatography on silica gel with PE/EA (100:1 to 6:1) to give the **3**.

Gram-scale:

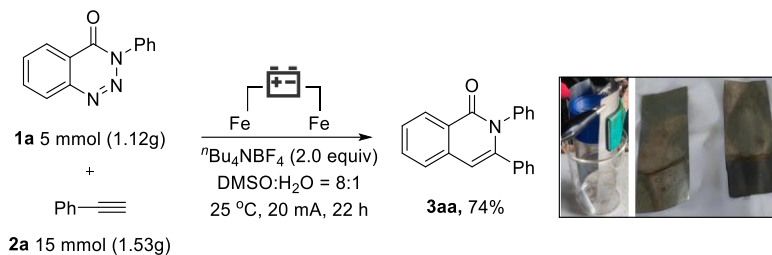

A mixture of **1a** (1.0 equiv, 5.0 mmol), alkyne **2a** (3 equiv, 15 mmol), and  $t\text{Bu}_4\text{NBF}_4$  (10 mmol, 2.0 equiv) in mixed DMSO (80 mL) and  $\text{H}_2\text{O}$  (10 mL) solution was added to a 150 mL oven-dried beaker with a magnetic stir bar. Subsequently, the beaker was equipped with a Fe plate (anode, 20 cm  $\times$  10 cm  $\times$  0.1 mm) and a Fe plate (cathode, 20 cm  $\times$  10 cm  $\times$  0.1 mm), the distance between which was approximately 2.5cm. All operations are performed in air. The constant current (20 mA) electrolysis was then performed at room temperature with vigorous stirring 22 h. Upon completion, the reaction mixture was poured into 100 mL  $\text{H}_2\text{O}$  and extracted with 150 mL EtOAc for three times. The combined organic layer was washed with 100 mL  $\text{H}_2\text{O}$  for two times and dried over anhydrous  $\text{Na}_2\text{SO}_4$ . Subsequently, the solvent was removed under reduced pressure. The resulting mixture was purified by chromatography on silica gel with PE/EA (50:1 to 30:1) to give the **3aa** (1.10 g, 74%).

## 5. Characterization Data of the Product

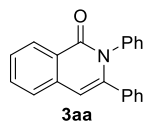

### 2,3-diphenylisoquinolin-1(2H)-one (**3aa**)

**3aa** was prepared according to general procedure; Eluent: petroleum ether/ethyl acetate (50:1);

White solid (46.4 mg, 78%). M.P.: 177.4-178.7  $^\circ\text{C}$ ,  $^1\text{H NMR}$  (400 MHz,  $\text{CDCl}_3$ )  $\delta$  8.46 (d,  $J = 7.9$

Hz, 1H), 7.72-7.68 (m, 1H), 7.56 (d,  $J = 7.9$  Hz, 1H), 7.51 (t,  $J = 7.5$  Hz, 1H), 7.29-7.25 (m, 2H),



7.23-7.03 (m, 8H), 6.60 (s, 1H).  $^{13}\text{C}$  NMR (100 MHz,  $\text{CDCl}_3$ )  $\delta$  163.1, 143.5, 139.0, 136.7, 136.2, 132.8, 129.4, 129.2, 128.6, 128.3, 128.0, 127.8, 127.6, 126.9, 126.0, 125.4, 107.9. These data are consistent with that in the literature.<sup>[2]</sup>

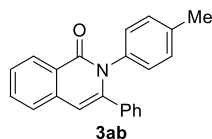

### 3-phenyl-2-(*p*-tolyl)isoquinolin-1(2*H*)-one (3ab)

**3ab** was prepared according to general procedure; Eluent: petroleum ether/ethyl acetate (50:1); White solid (38.6 mg, 62%). M.P.: 157.4-159.5 °C.  $^1\text{H}$  NMR (400 MHz,  $\text{CDCl}_3$ )  $\delta$  8.46 (dd,  $J = 8.0$ , 1.2 Hz, 1H), 7.66-7.70 (m, 1H), 7.61-7.43 (m, 2H), 7.23-7.12 (m, 5H), 7.06 (d,  $J = 8.1$  Hz, 2H), 7.00 (d,  $J = 8.3$  Hz, 2H), 6.59 (s, 1H), 2.28 (s, 3H).  $^{13}\text{C}$  NMR (100 MHz,  $\text{CDCl}_3$ )  $\delta$  163.2, 143.7, 137.4, 136.7, 136.4, 136.3, 132.7, 129.3, 129.3, 129.0, 128.4, 127.9, 127.8, 126.8, 126.0, 125.4, 107.8, 21.1. These data are consistent with that in the literature.<sup>[2]</sup>

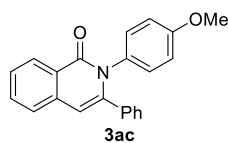

### 2-(4-methoxyphenyl)-3-phenylisoquinolin-1(2*H*)-one (3ac)

**3ac** was prepared according to general procedure; Eluent: petroleum ether/ethyl acetate (10:1); White solid (36.7 mg, 56%). M.P.: 173.5-175.2 °C.  $^1\text{H}$  NMR (400 MHz,  $\text{CDCl}_3$ )  $\delta$  8.46 (d,  $J = 8.0$  Hz, 1H), 7.66-7.70 (m, 1H), 7.60-7.43 (m, 2H), 7.23-7.14 (m, 5H), 7.03 (d,  $J = 8.9$  Hz, 2H), 6.78 (d,  $J = 8.9$  Hz, 2H), 6.59 (s, 1H), 3.75 (s, 3H).  $^{13}\text{C}$  NMR (100 MHz,  $\text{CDCl}_3$ )  $\delta$  163.3, 158.5, 143.9, 136.7, 136.3, 132.7, 131.8, 130.2, 129.2, 128.3, 127.9, 127.8, 126.8, 126.0, 125.4, 113.9, 107.7, 55.3. These data are consistent with that in the literature.<sup>[2]</sup>

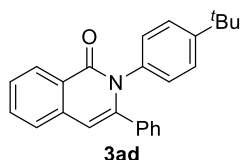

**2-(4-(*tert*-butyl)phenyl)-3-phenylisoquinolin-1(2*H*)-one (3ad)**

**3ad** was prepared according to general procedure; Eluent: petroleum ether/ethyl acetate (50:1); White solid (48.8 mg, 69%). M.P.: 161.2-164.7 °C. <sup>1</sup>H NMR (400 MHz, CDCl<sub>3</sub>) δ 8.46 (dd, *J* = 7.9, 1.2 Hz, 1H), 7.71-7.61 (m, 1H), 7.59-7.45 (m, 2H), 7.29-7.21 (m, 2H), 7.18-7.11 (m, 5H), 7.06-6.96 (m, 2H), 6.59 (s, 1H), 1.24 (s, 9H). <sup>13</sup>C NMR (100 MHz, CDCl<sub>3</sub>) δ 163.2, 150.5, 143.8, 136.8, 136.3, 136.3, 132.7, 129.2, 128.7, 128.4, 127.9, 127.7, 126.8, 126.0, 125.5, 125.4, 107.8, 34.5, 31.2. These data are consistent with that in the literature.<sup>[3]</sup>

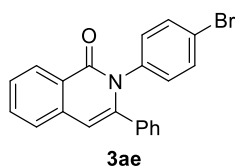

**2-(4-bromophenyl)-3-phenylisoquinolin-1(2*H*)-one (3ae)**

**3ae** was prepared according to general procedure; Eluent: petroleum ether/ethyl acetate (50:1); White solid (38.4 mg, 51%). M.P.: 164.5-167.1 °C. <sup>1</sup>H NMR (400 MHz, CDCl<sub>3</sub>) δ 8.45 (d, *J* = 8.0 Hz, 1H), 7.73-7.66 (m, 1H), 7.59-7.49 (m, 2H), 7.39 (d, *J* = 8.6 Hz, 2H), 7.25-7.09 (m, 5H), 7.01 (d, *J* = 8.6 Hz, 2H), 6.61 (s, 1H). <sup>13</sup>C NMR (100 MHz, CDCl<sub>3</sub>) δ 162.9, 143.1, 138.1, 136.7, 135.8, 133.0, 131.8, 131.0, 129.2, 128.3, 128.3, 128.1, 127.1, 126.1, 125.2, 121.6, 108.2. These data are consistent with that in the literature.<sup>[3]</sup>

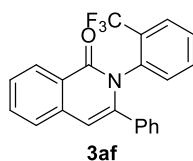

**3-phenyl-2-(2-(trifluoromethyl)phenyl)isoquinolin-1(2*H*)-one (3af)**

**3af** was prepared according to general procedure; Eluent: petroleum ether/ethyl acetate (50:1);

White solid (29.9 mg, 41%). M.P.: 167.1-169.6 °C. <sup>1</sup>H NMR (400 MHz, CDCl<sub>3</sub>) δ 8.45 (d, *J* = 7.8 Hz, 1H), 7.77-7.66 (m, 1H), 7.66-7.45 (m, 4H), 7.42-7.35 (m, 1H), 7.28-7.24 (m, 1H), 7.23-7.13 (m, 5H), 6.59 (s, 1H). <sup>13</sup>C NMR (100 MHz, CDCl<sub>3</sub>) δ 163.2, 143.4, 136.8, 135.3, 133.6, 133.0, 132.6, 132.2, 129.7, 128.8, 128.4 (q, *J* = 32.8 Hz), 127.6, 127.8, 127.1 (q, *J* = 4.1 Hz), 126.1, 126.1, 122.9 (q, *J* = 270.4 Hz), 108.1. HRMS calcd. for: C<sub>22</sub>H<sub>15</sub>F<sub>3</sub>NO [M+H]<sup>+</sup> 366.1100, found 366.1097.

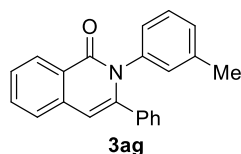

### **3-phenyl-2-(*m*-tolyl)isoquinolin-1(2*H*)-one (3ag)**

**3ag** was prepared according to general procedure; Eluent: petroleum ether/ethyl acetate (50:1); White solid (41.1 mg, 66%). M.P.: 164.1-167.4 °C. <sup>1</sup>H NMR (400 MHz, CDCl<sub>3</sub>) δ 8.47 (dd, *J* = 8.1, 1.2 Hz, 1H), 7.72-7.66 (m, 1H), 7.62-7.46 (m, 2H), 7.31-7.24 (m, 2H), 7.24-7.16 (m, 1H), 7.16-7.10 (m, 2H), 7.08-6.96 (m, 3H), 6.96-6.91 m, 1H), 6.60 (s, 1H), 2.22 (s, 3H). <sup>13</sup>C NMR (100 MHz, CDCl<sub>3</sub>) δ 163.1, 143.7, 139.1, 137.5, 136.8, 136.1, 132.7, 129.9, 129.4, 128.7, 128.5, 128.3, 127.6, 126.8, 126.4, 126.0, 125.4, 107.7, 21.2. HRMS calcd. for: C<sub>22</sub>H<sub>18</sub>NO [M+H]<sup>+</sup> 283.1264, found 283.1264.

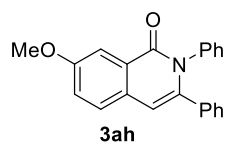

### **7-methoxy-2,3-diphenylisoquinolin-1(2*H*)-one (3ah)**

**3ag** was prepared according to general procedure; Eluent: petroleum ether/ethyl acetate (10:1); Yellow solid (41.8 mg, 64%). M.P.: 200.4-203.8 °C. <sup>1</sup>H NMR (400 MHz, CDCl<sub>3</sub>) δ 7.88 (d, *J* = 2.7

Hz, 1H), 7.50 (d,  $J = 8.7$  Hz, 1H), 7.35-7.22 (m, 3H), 7.22-7.18 (m, 1H), 7.18-7.10 (m, 7H), 6.58 (s, 1H), 3.94 (s, 3H).  $^{13}\text{C}$  NMR (100 MHz,  $\text{CDCl}_3$ )  $\delta$  162.8, 158.9, 141.3, 139.2, 136.3, 130.8, 129.4, 129.3, 128.5, 127.8, 127.7, 127.7, 127.6, 126.5, 123.3, 108.1, 107.7, 55.6. These data are consistent with that in the literature.<sup>[3]</sup>

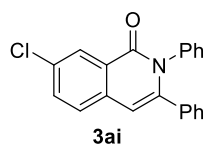

### 7-chloro-2,3-diphenylisoquinolin-1(2H)-one (3ai)

**3ai** was prepared according to general procedure; Eluent: petroleum ether/ethyl acetate (50:1); White solid (44.5 mg, 67%). M.P.: 184.3-186.1 °C.  $^1\text{H}$  NMR (400 MHz,  $\text{CDCl}_3$ )  $\delta$  8.42 (d,  $J = 2.2$  Hz, 1H), 7.66-7.60 (m, 1H), 7.54-7.48 (m, 1H), 7.32-7.23 (m, 2H), 7.24-7.13 (m, 7H), 7.13-7.08 (m, 1H), 6.57 (s, 1H).  $^{13}\text{C}$  NMR (100 MHz,  $\text{CDCl}_3$ )  $\delta$  162.1, 144.0, 138.8, 135.9, 135.1, 133.2, 132.8, 129.3, 129.2, 128.7, 128.2, 127.9, 127.8, 127.8, 127.6, 126.5, 107.1. HRMS calcd. for:  $\text{C}_{21}\text{H}_{14}\text{ClNNaO}$   $[\text{M}+\text{Na}]^+$  354.0662, found 354.0655.

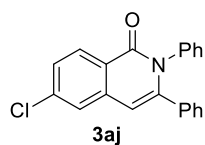

### 6-chloro-2,3-diphenylisoquinolin-1(2H)-one (3aj)

**3aj** was prepared according to general procedure; Eluent: petroleum ether/ethyl acetate (50:1); Yellow solid (39.1 mg, 59%). M.P.: 195.3-198.6 °C.  $^1\text{H}$  NMR (400 MHz,  $\text{CDCl}_3$ )  $\delta$  8.39 (d,  $J = 8.6$  Hz, 1H), 7.54 (d,  $J = 1.9$  Hz, 1H), 7.45 (dd,  $J = 8.6, 2.0$  Hz, 1H), 7.30-7.24 (m, 2H), 7.23-7.05 (m, 8H), 6.51 (s, 1H).  $^{13}\text{C}$  NMR (100 MHz,  $\text{CDCl}_3$ )  $\delta$  162.5, 145.1, 139.2, 138.7, 138.0, 135.8, 130.2, 129.3, 129.2, 128.7, 128.3, 127.9, 127.8, 127.4, 125.2, 123.7, 106.7. These data are consistent with that in the literature.<sup>[3]</sup>

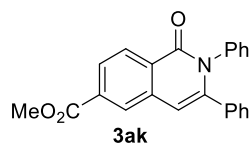

**methyl 1-oxo-2,3-diphenyl-1,2-dihydroisoquinoline-6-carboxylate (3ak)**

**3ak** was prepared according to general procedure; Eluent: petroleum ether/ethyl acetate (10:1);

Colorless liquid (26.3 mg, 37%). <sup>1</sup>H NMR (400 MHz, CDCl<sub>3</sub>) δ 8.51 (d, *J* = 8.4 Hz, 1H), 8.27 (d, *J* = 1.6 Hz, 1H), 8.10 (dd, *J* = 8.4, 1.6 Hz, 1H), 7.31-7.26 (m, 2H), 7.24-7.15 (m, 6H), 7.15-7.08 (m, 2H), 6.66 (s, 1H), 4.00 (s, 3H). <sup>13</sup>C NMR (100 MHz, CDCl<sub>3</sub>) δ 166.5, 162.6, 144.5, 138.8, 136.5, 135.8, 133.8, 129.2, 129.2, 128.7, 128.7, 128.2, 128.2, 128.1, 127.9, 127.9, 126.8, 107.7, 52.6.

HRMS calcd. for: C<sub>23</sub>H<sub>18</sub>NO<sub>3</sub> [M+H]<sup>+</sup> 356.1281, found 356.1287.

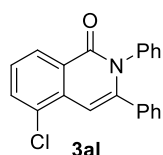

**5-chloro-2,3-diphenylisoquinolin-1(2H)-one (3al)**

**3al** was prepared according to general procedure; Eluent: petroleum ether/ethyl acetate (50:1);

White solid (41.8 mg, 63%). M.P.: 190.7-194.1 °C. <sup>1</sup>H NMR (400 MHz, CDCl<sub>3</sub>) δ 8.39 (d, *J* = 8.0 Hz, 1H), 7.75 (dd, *J* = 7.7, 1.1 Hz, 1H), 7.43 (t, *J* = 7.9 Hz, 1H), 7.32-7.25 (m, 2H), 7.24-7.16 (m, 6H), 7.14-7.07 (m, 2H), 6.96 (s, 1H). <sup>13</sup>C NMR (100 MHz, CDCl<sub>3</sub>) δ 162.5, 144.8, 138.7, 136.0, 134.6, 132.9, 130.5, 129.2, 128.7, 128.3, 127.9, 127.9, 127.3, 127.0, 126.9, 125.9, 103.9. These data are consistent with that in the literature.<sup>[3]</sup>

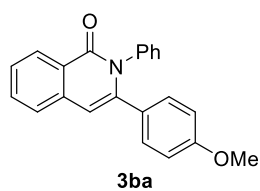

**3-(4-methoxyphenyl)-2-phenylisoquinolin-1(2H)-one (3ba)**

**3al** was prepared according to general procedure; Eluent: petroleum ether/ethyl acetate (10:1); Colorless liquid (47.4 mg, 72%). <sup>1</sup>H NMR (400 MHz, CDCl<sub>3</sub>) δ 8.45 (dd, *J* = 8.1, 1.2 Hz, 1H), 7.73-7.64 (m, 1H), 7.60-7.54 (m, 1H), 7.53-7.46 (m, 1H), 7.33-7.24 (m, 2H), 7.25-7.19 (m, 1H), 7.15-7.10 (m, 2H), 7.10-7.04 (m, 2H), 6.72-6.67 (m, 2H), 6.58 (s, 1H), 3.74 (s, 3H). <sup>13</sup>C NMR (100 MHz, CDCl<sub>3</sub>) δ 163.2, 159.1, 143.3, 139.1, 136.8, 132.7, 130.5, 129.3, 128.6, 128.6, 128.3, 127.6, 126.7, 125.9, 125.2, 113.2, 107.7, 55.1. These data are consistent with that in the literature.<sup>[2]</sup>

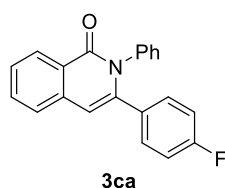

### **3-(4-fluorophenyl)-2-phenylisoquinolin-1(2H)-one (3ca)**

**3ca** was prepared according to general procedure; Eluent: petroleum ether/ethyl acetate (50:1); White solid (42.9 mg, 68%). M.P.: 206.7-208.5 °C. <sup>1</sup>H NMR (400 MHz, CDCl<sub>3</sub>) δ 8.44 (d, *J* = 9.3 Hz, 1H), 7.67 (t, *J* = 8.2 Hz, 1H), 7.56-7.44 (m, 2H), 7.31-7.22 (m, 2H), 7.22-7.16 (m, 1H), 7.14-7.02 (m, 4H), 6.84 (t, *J* = 8.6 Hz, 2H), 6.56 (s, 1H). <sup>13</sup>C NMR (100 MHz, CDCl<sub>3</sub>) δ 162.2 (d, *J* = 248.9 Hz), 163.0, 142.5, 139.0, 136.6, 132.8, 132.3 (d, *J* = 3.6 Hz), 131.1 (d, *J* = 8.3 Hz), 129.3, 128.7, 128.4, 127.8, 127.1, 126.0, 125.5, 114.9 (d, *J* = 21.7 Hz), 108.0. These data are consistent with that in the literature.<sup>[3]</sup>

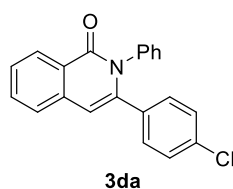

### **3-(4-chlorophenyl)-2-phenylisoquinolin-1(2H)-one (3da)**

**3da** was prepared according to general procedure; Eluent: petroleum ether/ethyl acetate (50:1); White solid (45.8 mg, 69%). M.P.: 190.7-193.5 °C. <sup>1</sup>H NMR (400 MHz, CDCl<sub>3</sub>) δ 8.42 (dd, *J* = 8.1,

1.2 Hz, 1H), 7.73-7.58 (m, 1H), 7.58-7.44 (m, 2H), 7.34-7.16 (m, 3H), 7.15-7.02 (m, 6H), 6.54 (s, 1H). <sup>13</sup>C NMR (100 MHz, CDCl<sub>3</sub>) δ 162.9, 142.3, 138.8, 136.5, 134.6, 134.1, 132.8, 130.4, 129.3, 128.8, 128.3, 128.1, 127.8, 127.1, 126.0, 125.4, 108.1. These data are consistent with that in the literature.<sup>[3]</sup>

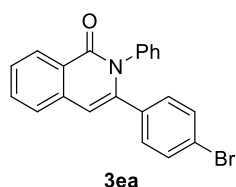

### **3-(4-bromophenyl)-2-phenylisoquinolin-1(2H)-one (3ea)**

**3ea** was prepared according to general procedure; Eluent: petroleum ether/ethyl acetate (50:1);

White solid (30.8 mg, 41%). M.P.: 188.3-191.1 °C. <sup>1</sup>H NMR (400 MHz, CDCl<sub>3</sub>) δ 8.46 (dd, *J* = 8.0, 1.2 Hz, 1H), 7.75-7.66 (m, 1H), 7.61-7.45 (m, 2H), 7.34-7.27 (m, 4H), 7.26-7.19 (m, 1H), 7.15-7.08 (m, 2H), 7.06-6.99 (m, 2H), 6.58 (s, 1H). <sup>13</sup>C NMR (100 MHz, CDCl<sub>3</sub>) δ 163.0, 142.3, 138.8, 136.5, 135.1, 132.9, 131.1, 130.7, 129.3, 128.8, 128.4, 127.9, 127.2, 126.1, 125.5, 122.4, 108.1. These data are consistent with that in the literature.<sup>[2]</sup>

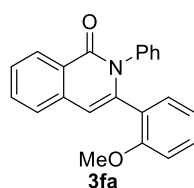

### **3-(2-methoxyphenyl)-2-phenylisoquinolin-1(2H)-one (3fa)**

**3fa** was prepared according to general procedure; Eluent: petroleum ether/ethyl acetate (10:1);

White solid (27.5 mg, 42%). M.P.: 139.1-141.2 °C. <sup>1</sup>H NMR (400 MHz, CDCl<sub>3</sub>) δ 8.48 (dd, *J* = 8.1, 1.2 Hz, 1H), 7.68-7.63 (m, 1H), 7.60-7.45 (m, 2H), 7.45-7.04 (m, 6H), 6.88-6.83 (m, 2H), 6.60-6.53 (m, 2H), 3.57 (s, 3H). <sup>13</sup>C NMR (100 MHz, CDCl<sub>3</sub>) δ 163.0, 156.0, 141.2, 138.8, 136.9,

132.5, 131.1, 130.4, 128.2, 127.5, 126.7, 125.9, 125.7, 125.3, 120.0, 110.0, 107.5, 54.7. These data are consistent with that in the literature.<sup>[4]</sup>

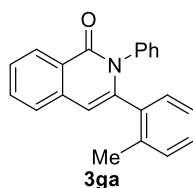

### 2-phenyl-3-(*o*-tolyl)isoquinolin-1(2*H*)-one (3ga)

**3ga** was prepared according to general procedure; Eluent: petroleum ether/ethyl acetate (50:1); White solid (37.4 mg, 60%). M.P.: 139.1-141.2 °C. <sup>1</sup>H NMR (400 MHz, CDCl<sub>3</sub>) δ 8.49 (dd, *J* = 8.1, 1.2 Hz, 1H), 7.78-7.65 (m, 1H), 7.59-7.48 (m, 2H), 7.25-7.07 (m, 7H), 7.03 (t, *J* = 6.8 Hz, 2H), 6.51 (s, 1H), 2.21 (s, 3H). <sup>13</sup>C NMR (100 MHz, CDCl<sub>3</sub>) δ 163.1, 142.7, 138.6, 136.7, 136.0, 135.4, 132.7, 130.6, 129.8, 128.5, 128.4, 128.3, 127.8, 126.8, 125.9, 125.5, 125.0, 107.4, 20.1. HRMS calcd. for: C<sub>22</sub>H<sub>18</sub>NO [M+H]<sup>+</sup> 283.1264, found 283.1268.

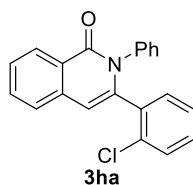

### 3-(2-chlorophenyl)-2-phenylisoquinolin-1(2*H*)-one (3ha)

**3ha** was prepared according to general procedure; Eluent: petroleum ether/ethyl acetate (50:1); White solid (44.5 mg, 67%). M.P.: 186.4-188.7 °C. <sup>1</sup>H NMR (400 MHz, CDCl<sub>3</sub>) δ 8.49 (dd, *J* = 8.1, 1.2 Hz, 1H), 7.75-7.67 (m, 1H), 7.61-7.48 (m, 2H), 7.43-7.32 (m, 1H), 7.25-6.99 (m, 8H), 6.56 (s, 1H). <sup>13</sup>C NMR (100 MHz, CDCl<sub>3</sub>) δ 162.9, 140.3, 138.5, 136.5, 134.9, 133.5, 132.7, 132.0, 129.9, 129.3, 129.2, 128.7, 128.4, 128.3, 128.0, 127.2, 126.1, 126.0, 125.8, 108.0. These data are consistent with that in the literature.<sup>[5]</sup>



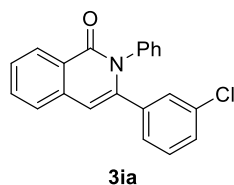

### 3-(3-chlorophenyl)-2-phenylisoquinolin-1(2H)-one (3ia)

**3ia** was prepared according to general procedure; Eluent: petroleum ether/ethyl acetate (50:1);

White solid (40.5 mg, 61%). M.P.: 166.4-169.7 °C. <sup>1</sup>H NMR (400 MHz, CDCl<sub>3</sub>) δ 8.47 (d, *J* = 8.1 Hz, 1H), 7.74-7.67 (m, 1H), 7.64-7.47 (m, 2H), 7.38-7.20 (m, 4H), 7.19-7.05 (m, 4H), 7.04-6.98 (m, 1H), 6.60 (s, 1H). <sup>13</sup>C NMR (100 MHz, CDCl<sub>3</sub>) δ 162.9, 142.0, 138.7, 137.8, 136.5, 133.8, 132.9, 129.3, 129.3, 129.0, 128.8, 128.4, 128.2, 127.9, 127.5, 127.3, 126.1, 125.6, 108.2. These data are consistent with that in the literature.<sup>[6]</sup>

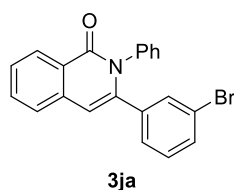

### 3-(3-bromophenyl)-2-phenylisoquinolin-1(2H)-one (3ja)

**3ja** was prepared according to general procedure; Eluent: petroleum ether/ethyl acetate (50:1);

White solid (32.3 mg, 43%). M.P.: 186.7-189.1 °C. <sup>1</sup>H NMR (400 MHz, CDCl<sub>3</sub>) δ 8.42 (dd, *J* = 8.1, 1.2 Hz, 1H), 7.69-7.62 (m, 1H), 7.57-7.45 (m, 2H), 7.35-7.31 (m, 1H), 7.30-7.16 (m, 4H), 7.12-7.05 (m, 2H), 7.04-6.93 (m, 2H), 6.55 (s, 1H). <sup>13</sup>C NMR (100 MHz, CDCl<sub>3</sub>) δ 162.9, 141.9, 138.7, 138.0, 136.4, 132.9, 132.1, 131.1, 129.3, 129.2, 128.8, 128.4, 127.9, 127.9, 127.3, 126.1, 125.5, 121.8, 108.2. These data are consistent with that in the literature.<sup>[5]</sup>

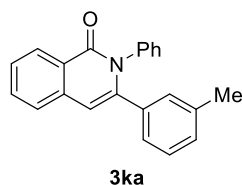

### 2-phenyl-3-(*m*-tolyl)isoquinolin-1(2H)-one (3ka)

**3ka** was prepared according to general procedure; Eluent: petroleum ether/ethyl acetate (50:1); White solid (38.6 mg, 62%). M.P.: 125.8-128.4 °C. <sup>1</sup>H NMR (400 MHz, CDCl<sub>3</sub>) δ 8.47 (dd, *J* = 8.1, 1.2 Hz, 1H), 7.72-7.66 (m, 1H), 7.62-7.47 (m, 2H), 7.31-7.24 (m, 2H), 7.23-7.17 (m, 1H), 7.15-7.11 (m, 2H), 7.08-6.97 (m, 3H), 6.96-6.91 (m, 1H), 6.60 (s, 1H), 2.22 (s, 3H). <sup>13</sup>C NMR (100 MHz, CDCl<sub>3</sub>) δ 163.1, 143.7, 139.1, 137.5, 136.8, 136.1, 132.7, 129.9, 129.4, 128.7, 128.5, 128.3, 127.6, 126.8, 126.4, 126.0, 125.4, 107.7, 21.2. These data are consistent with that in the literature.<sup>[5]</sup>

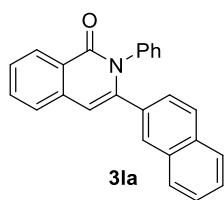

### 3-(naphthalen-2-yl)-2-phenylisoquinolin-1(2H)-one (3la)

**3la** was prepared according to general procedure; Eluent: petroleum ether/ethyl acetate (50:1); White solid (52.8 mg, 76%). M.P.: 196.1-198.4 °C. <sup>1</sup>H NMR (400 MHz, CDCl<sub>3</sub>) δ 8.50 (d, *J* = 8.0 Hz, 1H), 7.84-7.67 (m, 4H), 7.64-7.51 (m, 3H), 7.50-7.44 (m, 2H), 7.29-7.11 (m, 6H), 6.71 (s, 1H). <sup>13</sup>C NMR (100 MHz, CDCl<sub>3</sub>) δ 163.1, 143.5, 139.0, 136.8, 133.8, 132.8, 132.7, 132.4, 129.4, 128.6, 128.5, 128.4, 128.0, 127.7, 127.6, 127.2, 127.0, 126.6, 126.5, 126.4, 126.1, 125.4, 108.4. These data are consistent with that in the literature.<sup>[2]</sup>

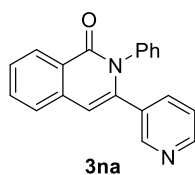

### 2-phenyl-3-(pyridin-3-yl)isoquinolin-1(2H)-one (3na)

**3na** was prepared according to general procedure; Eluent: petroleum ether/ethyl acetate (10:1 - 2:1); White solid (43.7 mg, 73%). M.P.: 193.4-194.7 °C. <sup>1</sup>H NMR (400 MHz, CDCl<sub>3</sub>) δ 8.55-8.51 (m, 1H), 8.50-8.45 (m, 1H), 8.43 (dd, *J* = 4.9, 1.7 Hz, 1H), 7.76-7.69 (m, 1H), 7.64-7.51 (m, 2H), 7.43-

7.36 (m, 1H), 7.36-7.27 (m, 2H), 7.26-7.21 (m, 1H), 7.16-7.11 (m, 2H), 7.10-7.05 (m, 1H), 6.63 (s, 1H). <sup>13</sup>C NMR (100 MHz, CDCl<sub>3</sub>) δ 162.9, 149.5, 149.1, 140.0, 138.5, 136.4, 136.3, 133.0, 132.2, 129.4, 129.0, 128.4, 128.1, 127.5, 126.2, 125.7, 122.5, 108.7. These data are consistent with that in the literature.<sup>[5]</sup>

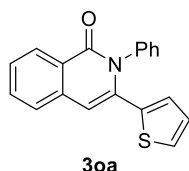

### 2-phenyl-3-(thiophen-2-yl)isoquinolin-1(2H)-one (3oa)

**3oa** was prepared according to general procedure; Eluent: petroleum ether/ethyl acetate (40:1 - 20:1); White solid (42.5 mg, 70%). M.P.: 179.2-179.6 °C. <sup>1</sup>H NMR (400 MHz, CDCl<sub>3</sub>) δ 8.44 (dd, *J* = 8.0, 1.3 Hz, 1H), 7.76-7.66 (m, 1H), 7.62-7.55 (m, 1H), 7.55-7.49 (m, 1H), 7.42-7.30 (m, 3H), 7.25-7.18 (m, 3H), 6.83-6.79 (m, 2H), 6.74 (dd, *J* = 3.6, 1.3 Hz, 1H). <sup>13</sup>C NMR (100 MHz, CDCl<sub>3</sub>) δ 163.1, 139.1, 137.2, 136.7, 136.5, 132.9, 129.3, 129.0, 128.8, 128.3, 128.3, 127.3, 127.2, 126.6, 126.1, 125.5, 108.7. HRMS calcd. for: C<sub>19</sub>H<sub>14</sub>NOS [M+H]<sup>+</sup> 304.0791, found 304.0791.

## 6. References

- [1] K. Madasamy, M. H. Balakrishnan, R. Korivi, S. Mannathan, *J. Org. Chem.* **2022**, *87*, 8752-8756.
- [2] D. Y. Li, X. S. Shang, G. R. Chen, P. N. Liu, *Org. Lett.* **2013**, *15*, 3848-3851.
- [3] M. Zhang, H.-J. Zhang, W. Ruan, T.-B. Wen, *Eur. J. Org. Chem.* **2015**, *2015*, 5914-5918.
- [4] H. Wang, S. Yu, *Org. Lett.* **2015**, *17*, 4272-4275.
- [5] H. Xie, Q. Xing, Z. Shan, F. Xiao, G.-J. Deng, *Adv. Synth. Catal.* **2019**, *361*, 1896-1901.

## 7. $^1\text{H}$ and $^{13}\text{C}$ Spectrums of Compounds

### $^1\text{H}$ NMR of 2,3-diphenylisoquinolin-1(2H)-one (3aa)

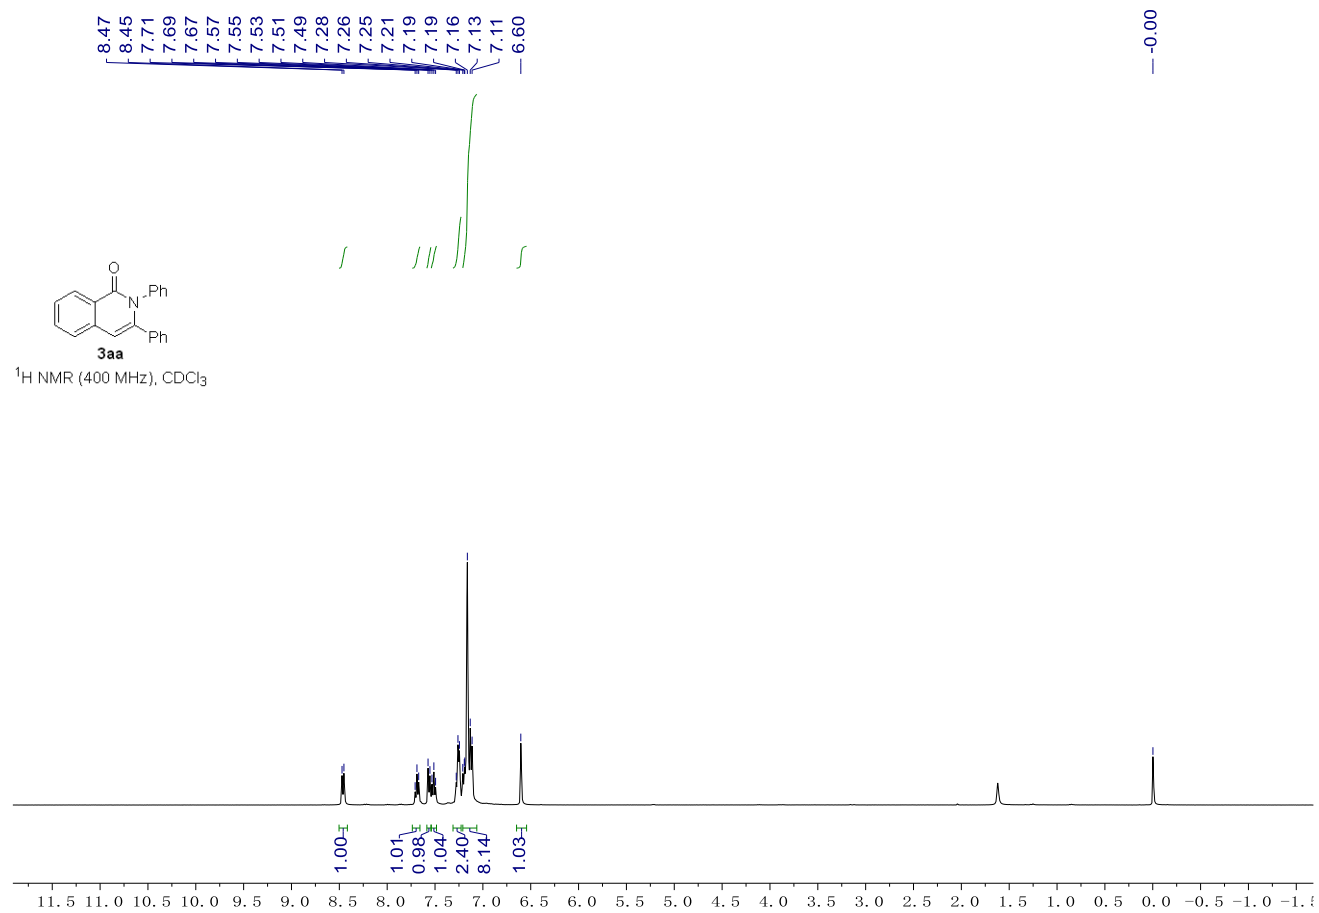

**<sup>13</sup>C NMR of 2,3-diphenylisoquinolin-1(2H)-one (3aa)**

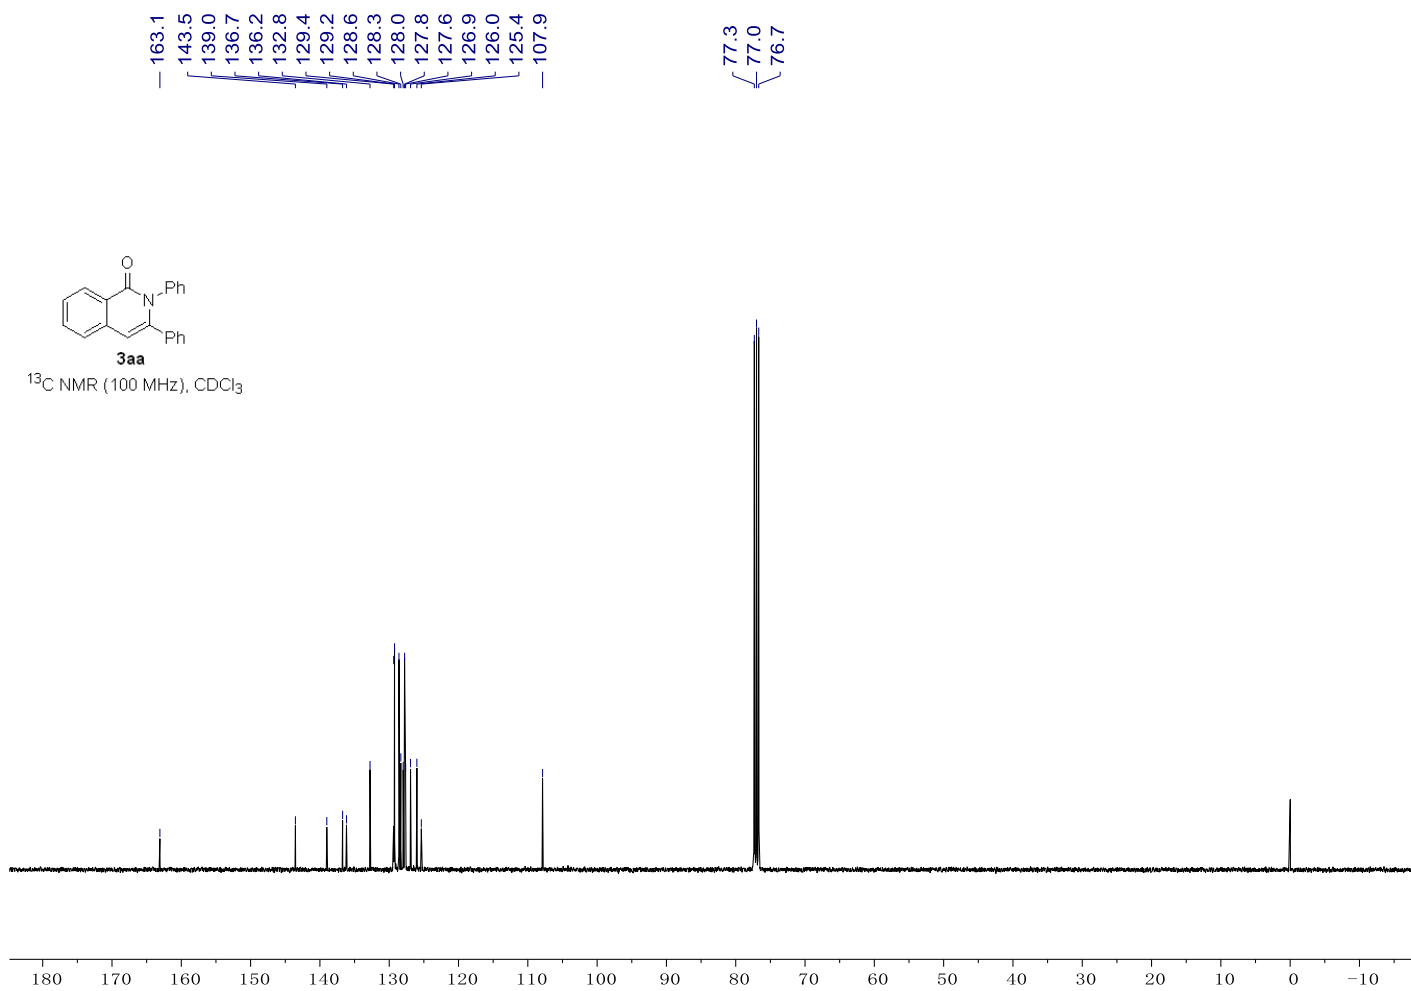

**<sup>1</sup>H NMR of 3-phenyl-2-(*p*-tolyl)isoquinolin-1(2*H*)-one (3ab)**

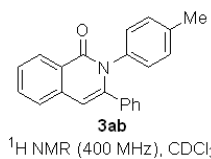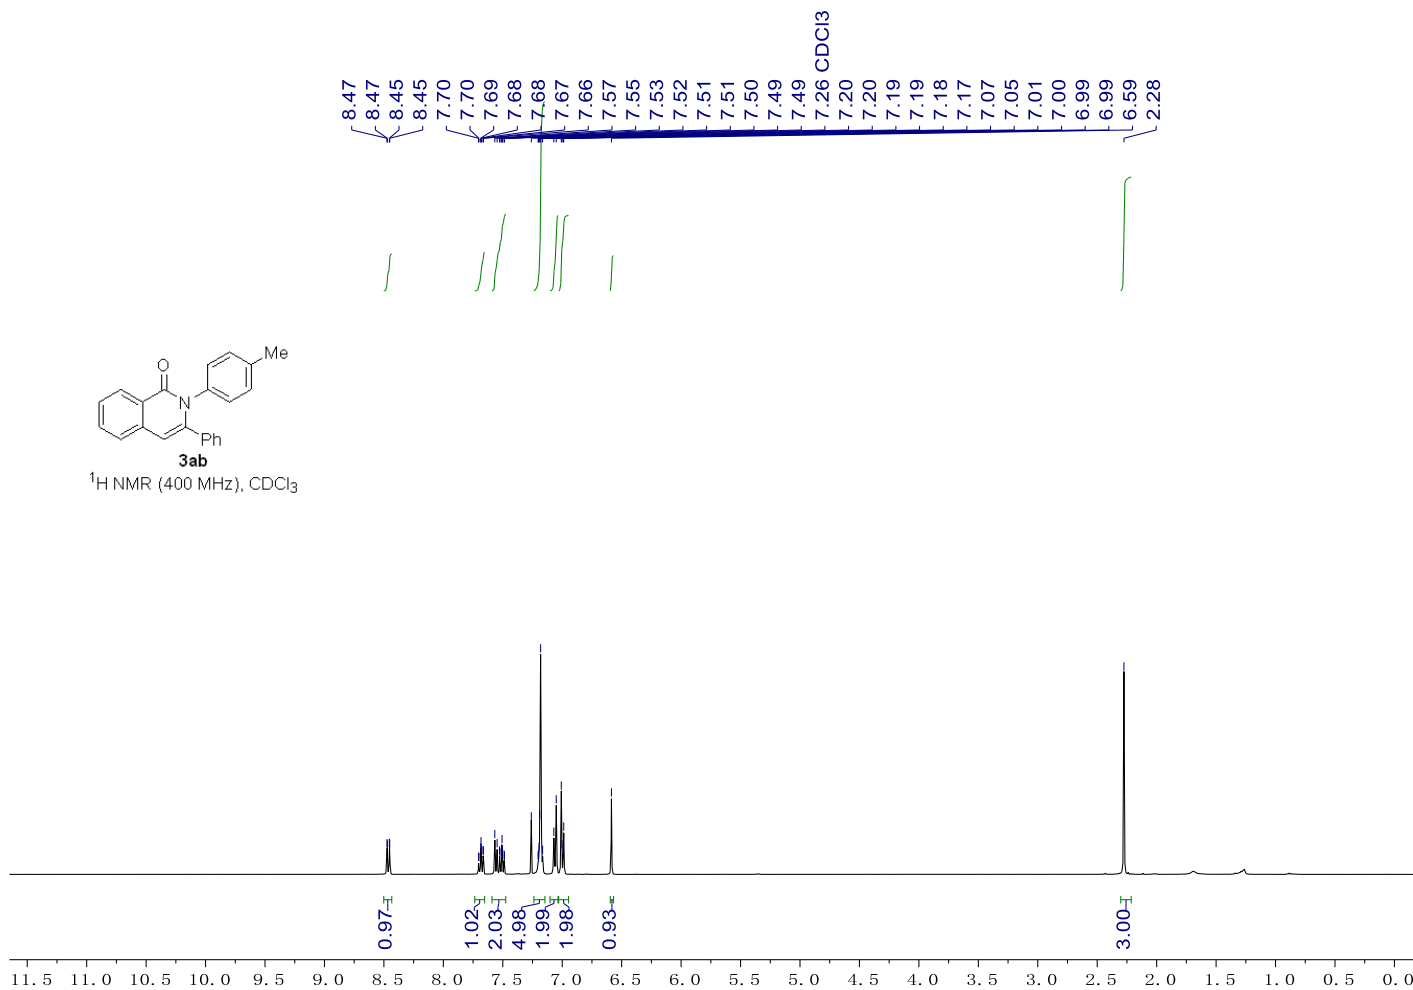

**<sup>13</sup>C NMR of 3-phenyl-2-(*p*-tolyl)isoquinolin-1(2*H*)-one (3ab)**

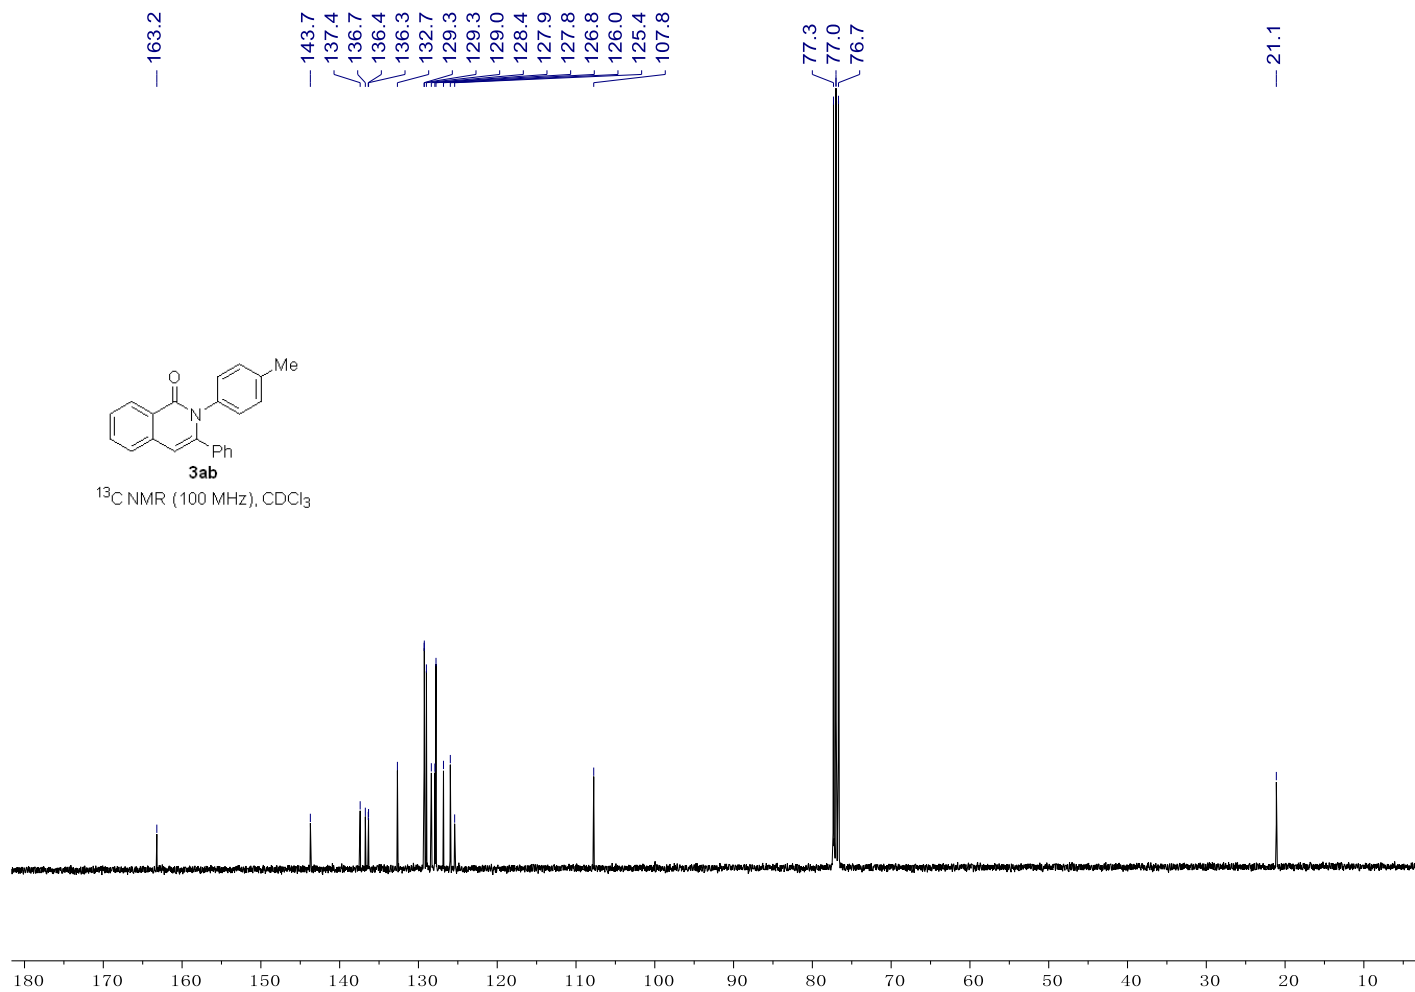

**<sup>1</sup>H NMR of 2-(4-methoxyphenyl)-3-phenylisoquinolin-1(2H)-one (3ac)**

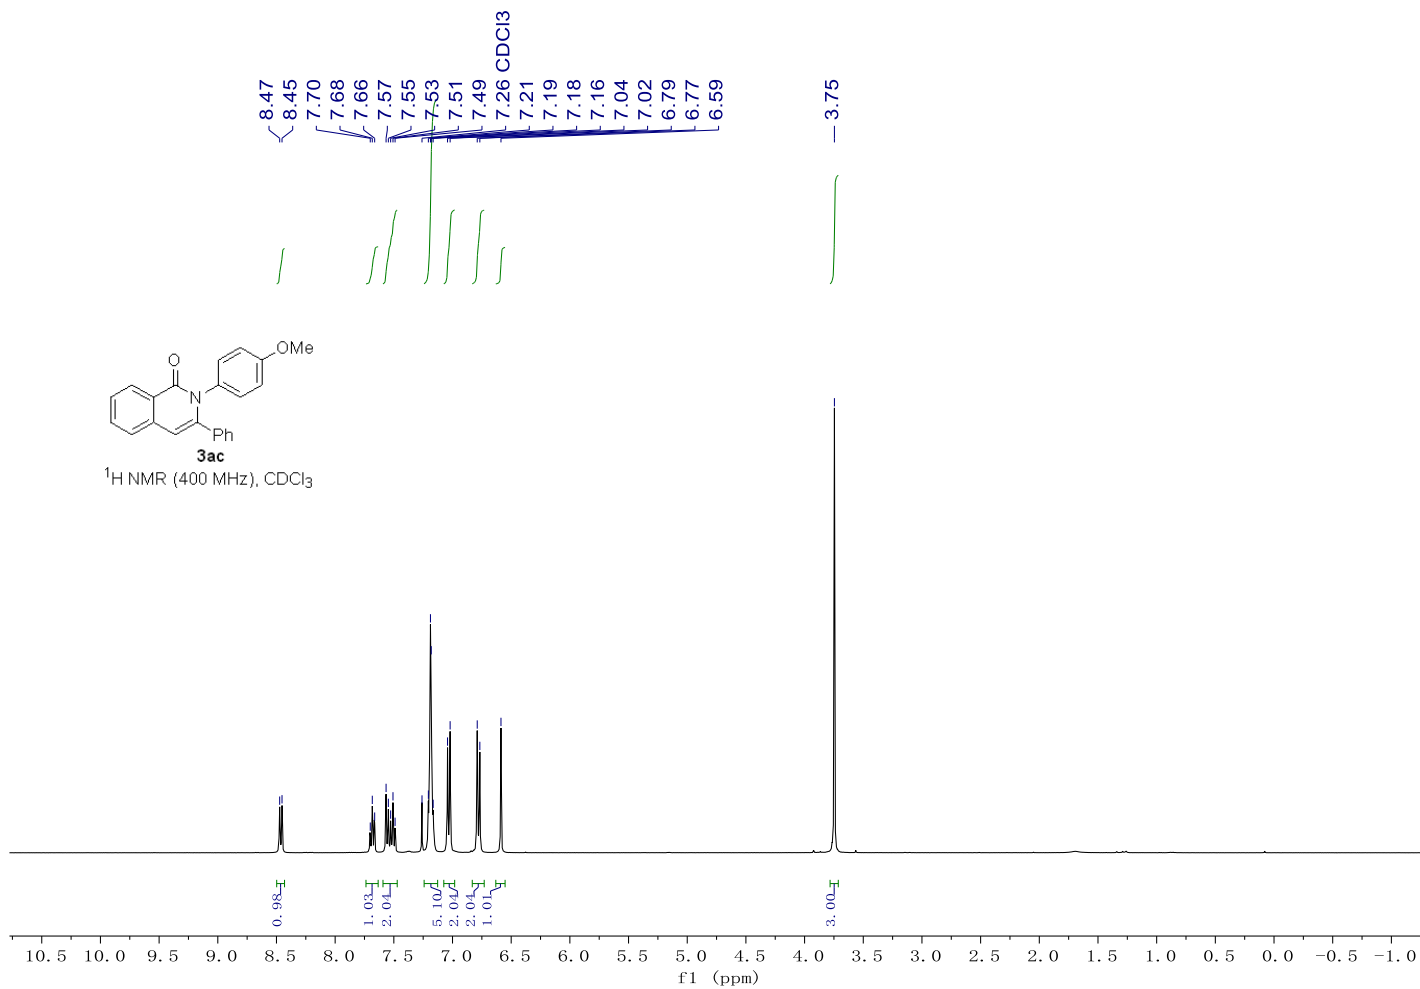



**<sup>13</sup>C NMR of 2-(4-methoxyphenyl)-3-phenylisoquinolin-1(2H)-one (3ac)**

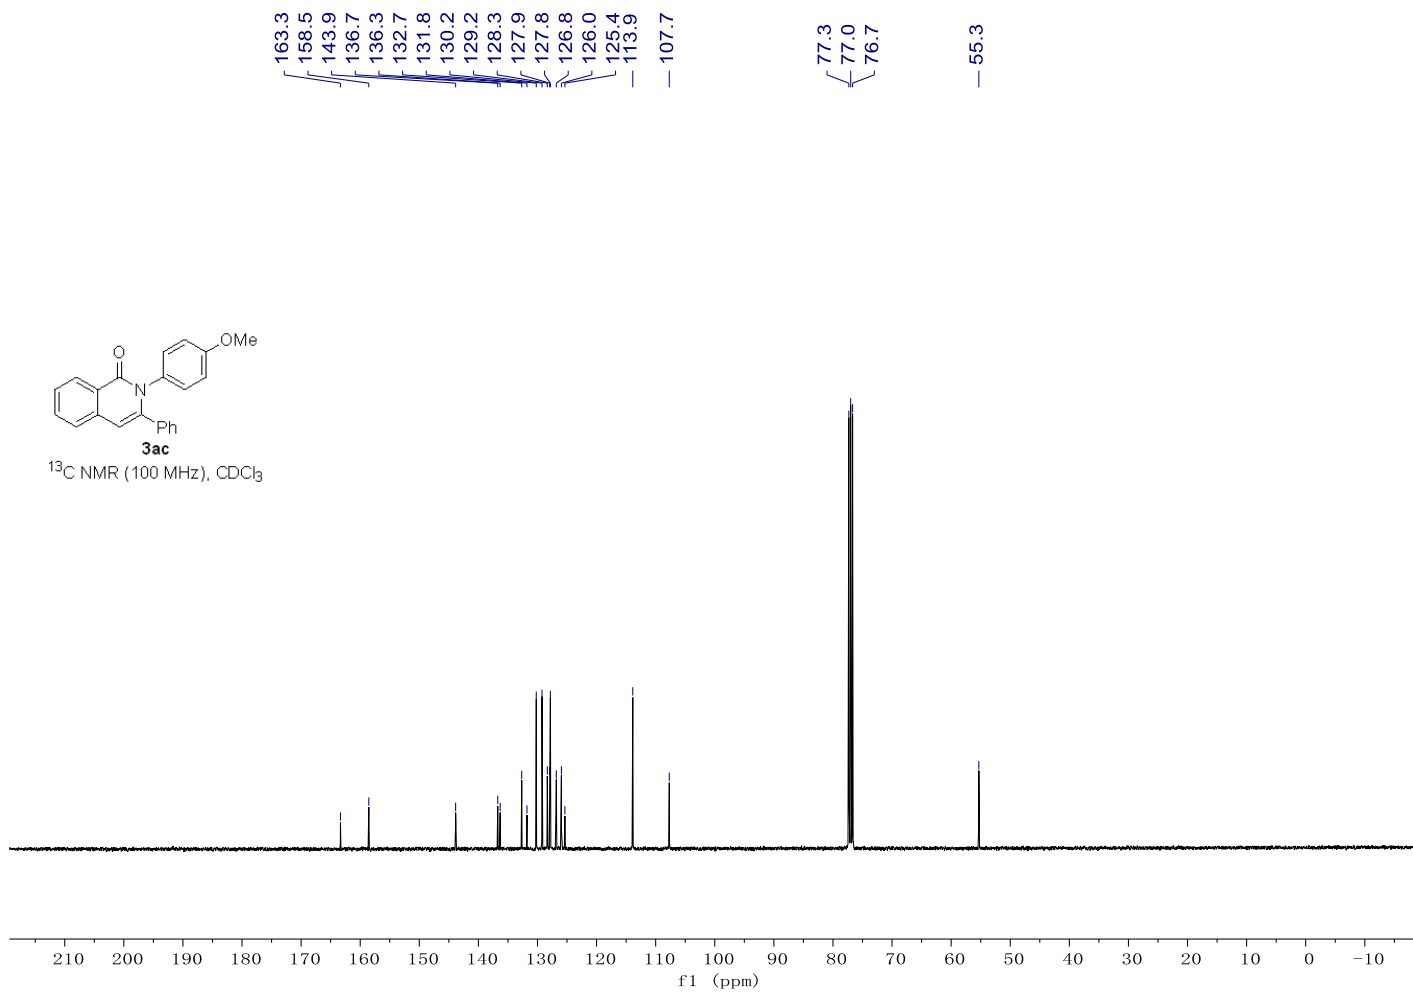

**<sup>1</sup>H NMR of 2-(4-(*tert*-butyl)phenyl)-3-phenylisoquinolin-1(2*H*)-one (3ad)**

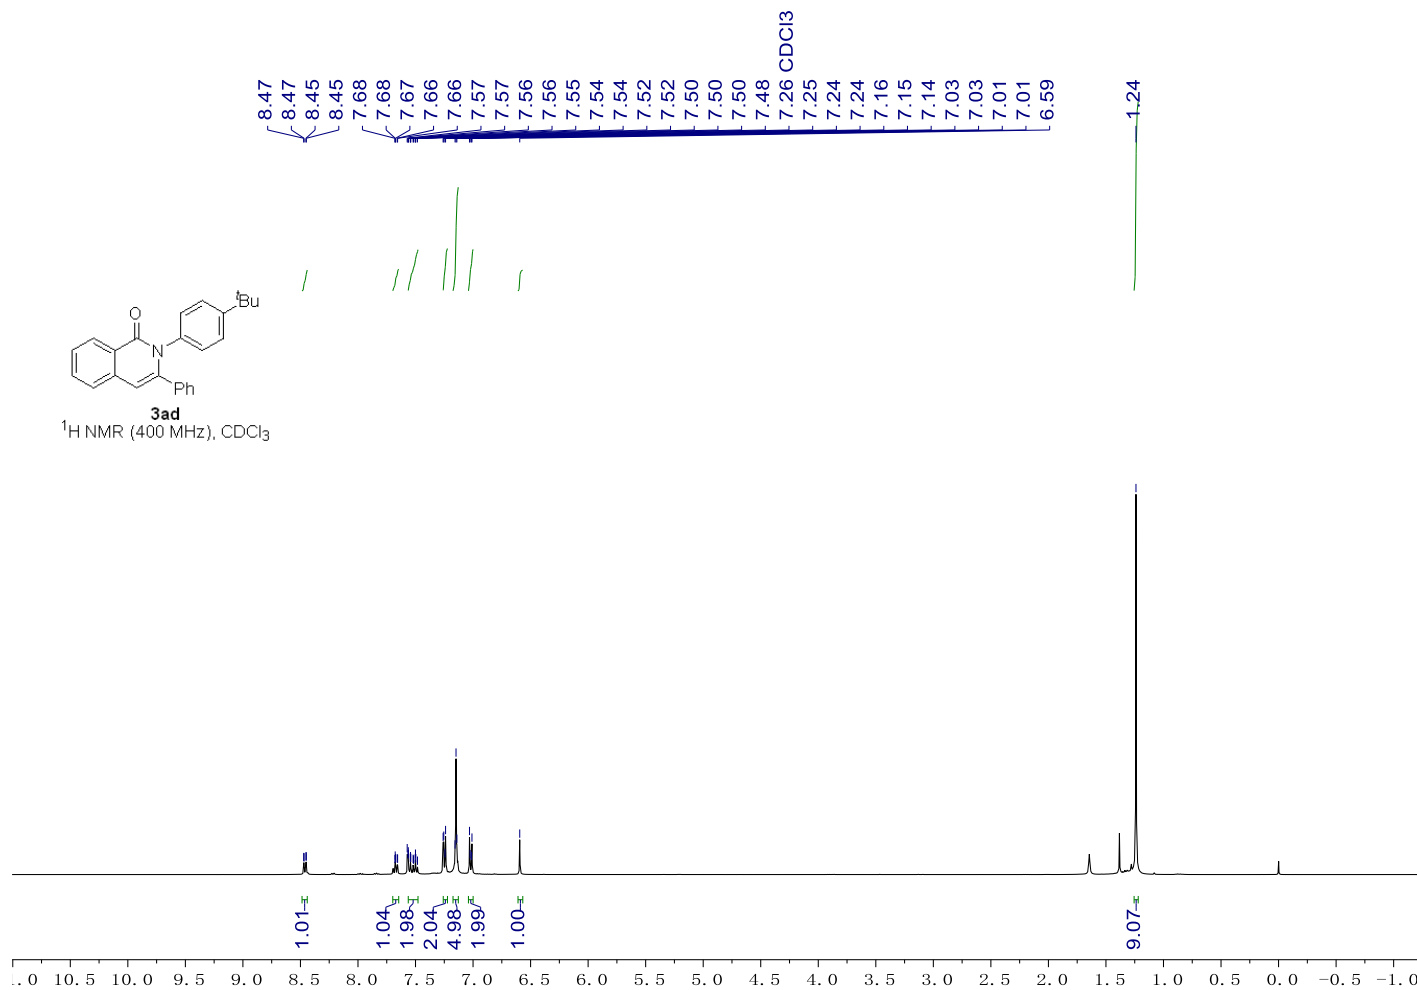

**<sup>13</sup>C NMR of 2-(4-(*tert*-butyl)phenyl)-3-phenylisoquinolin-1(2*H*)-one (3ad)**

163.2  
150.5  
143.8  
136.8  
136.3  
136.3  
132.7  
129.2  
128.7  
128.4  
127.9  
127.7  
126.8  
126.0  
125.5  
125.4  
— 107.8

77.3  
77.0  
76.7

— 34.5  
— 31.2

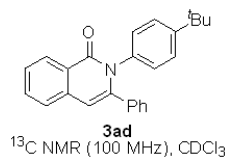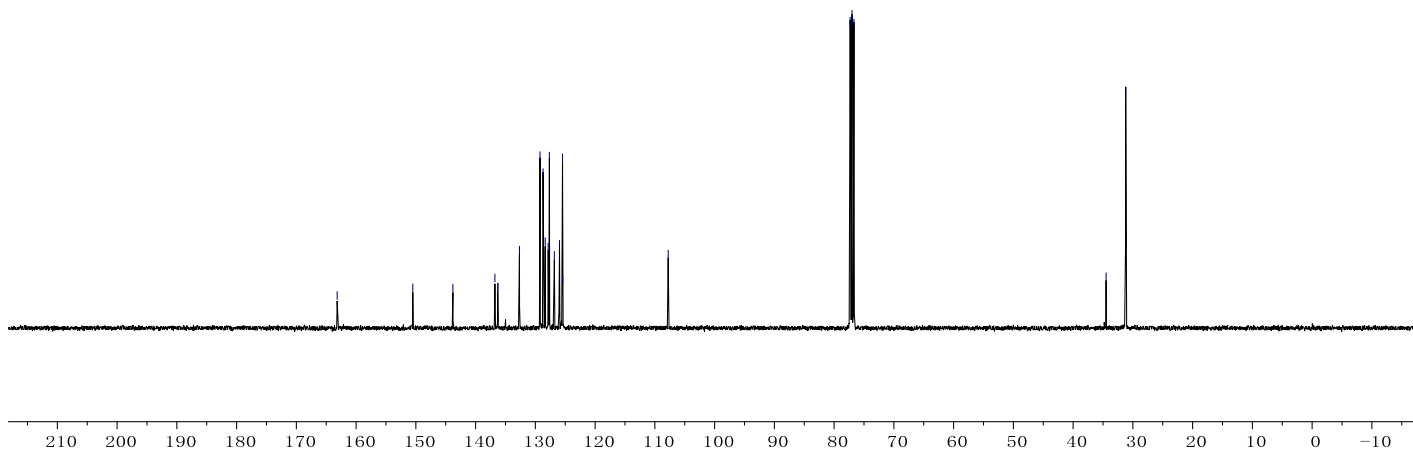

**<sup>1</sup>H NMR of 2-(4-bromophenyl)-3-phenylisoquinolin-1(2H)-one (3ae)**

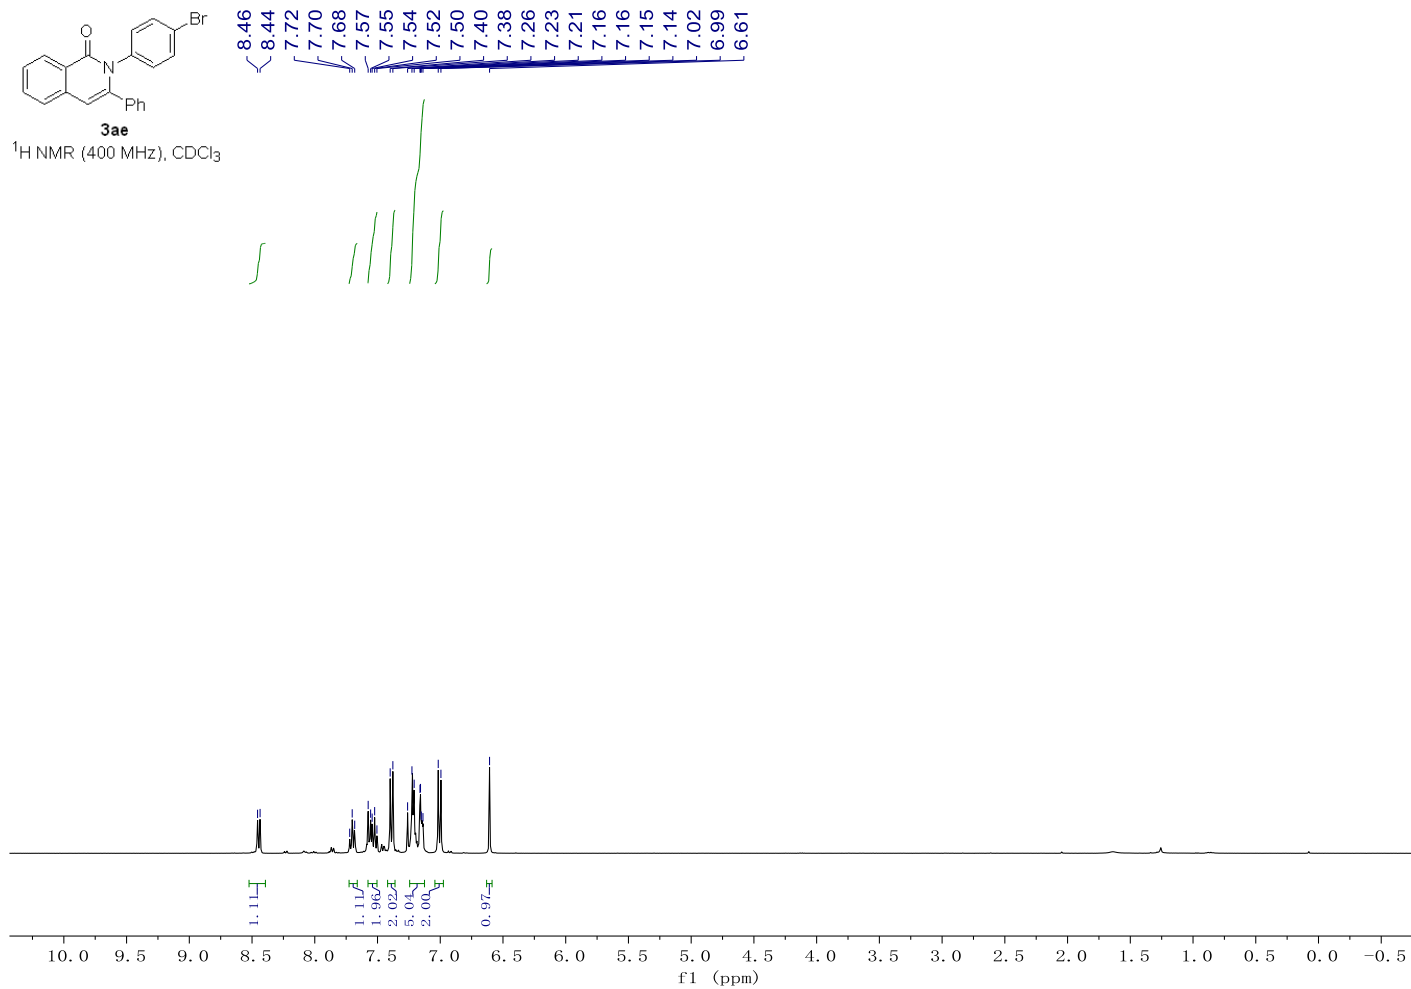

**<sup>13</sup>C NMR of 2-(4-bromophenyl)-3-phenylisoquinolin-1(2H)-one (3ae)**

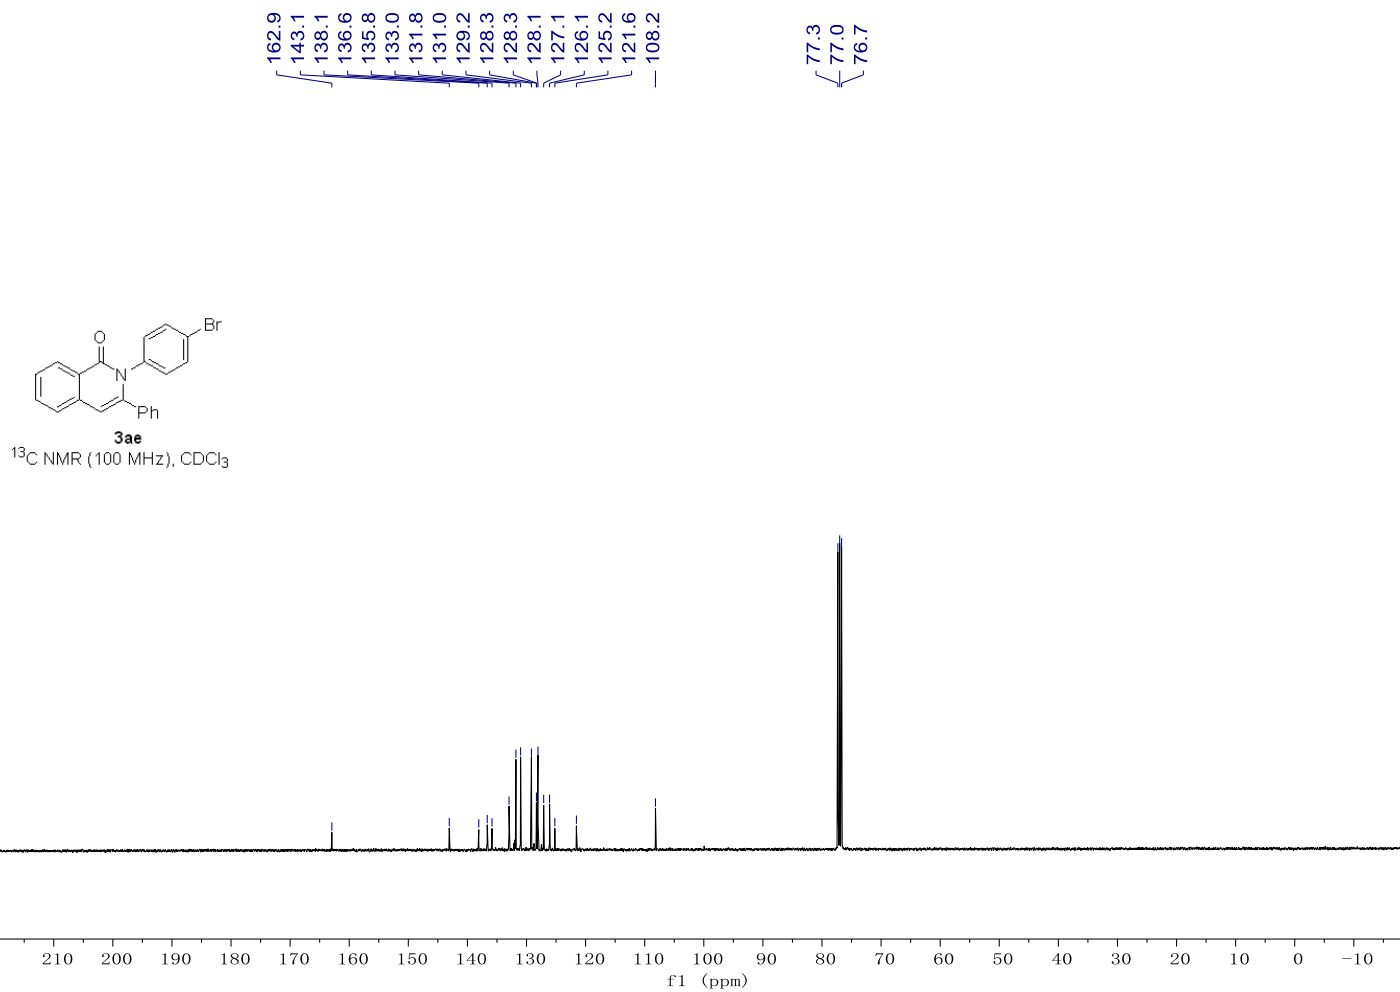

**<sup>1</sup>H NMR of 3-phenyl-2-(2-(trifluoromethyl)phenyl)isoquinolin-1(2H)-one (3af)**

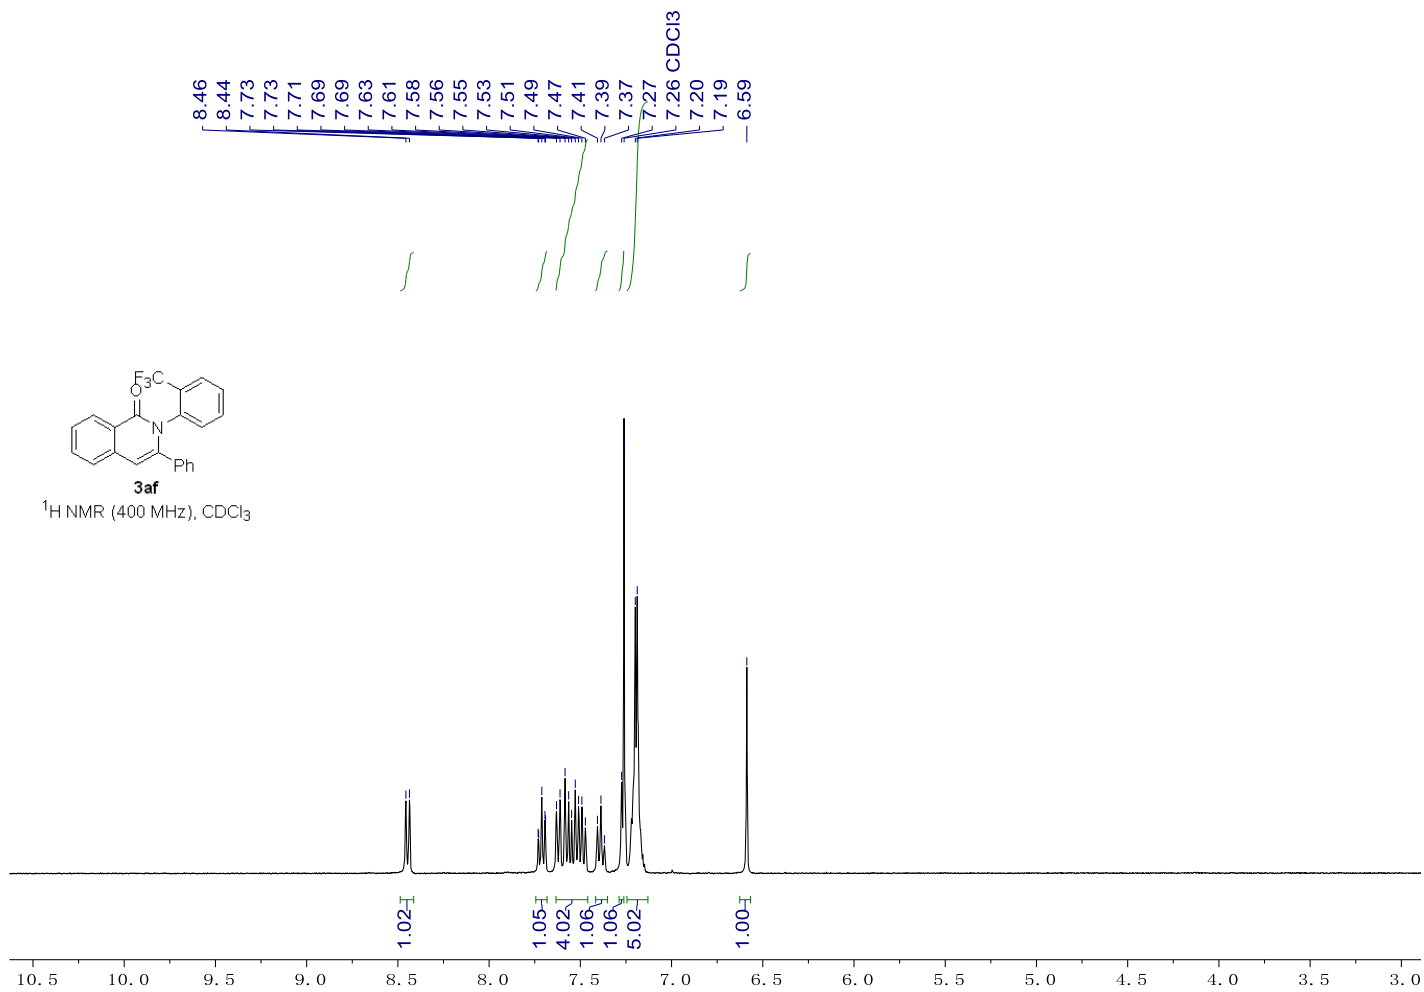

**<sup>13</sup>C NMR of 3-phenyl-2-(2-(trifluoromethyl)phenyl)isoquinolin-1(2H)-one (3af)**

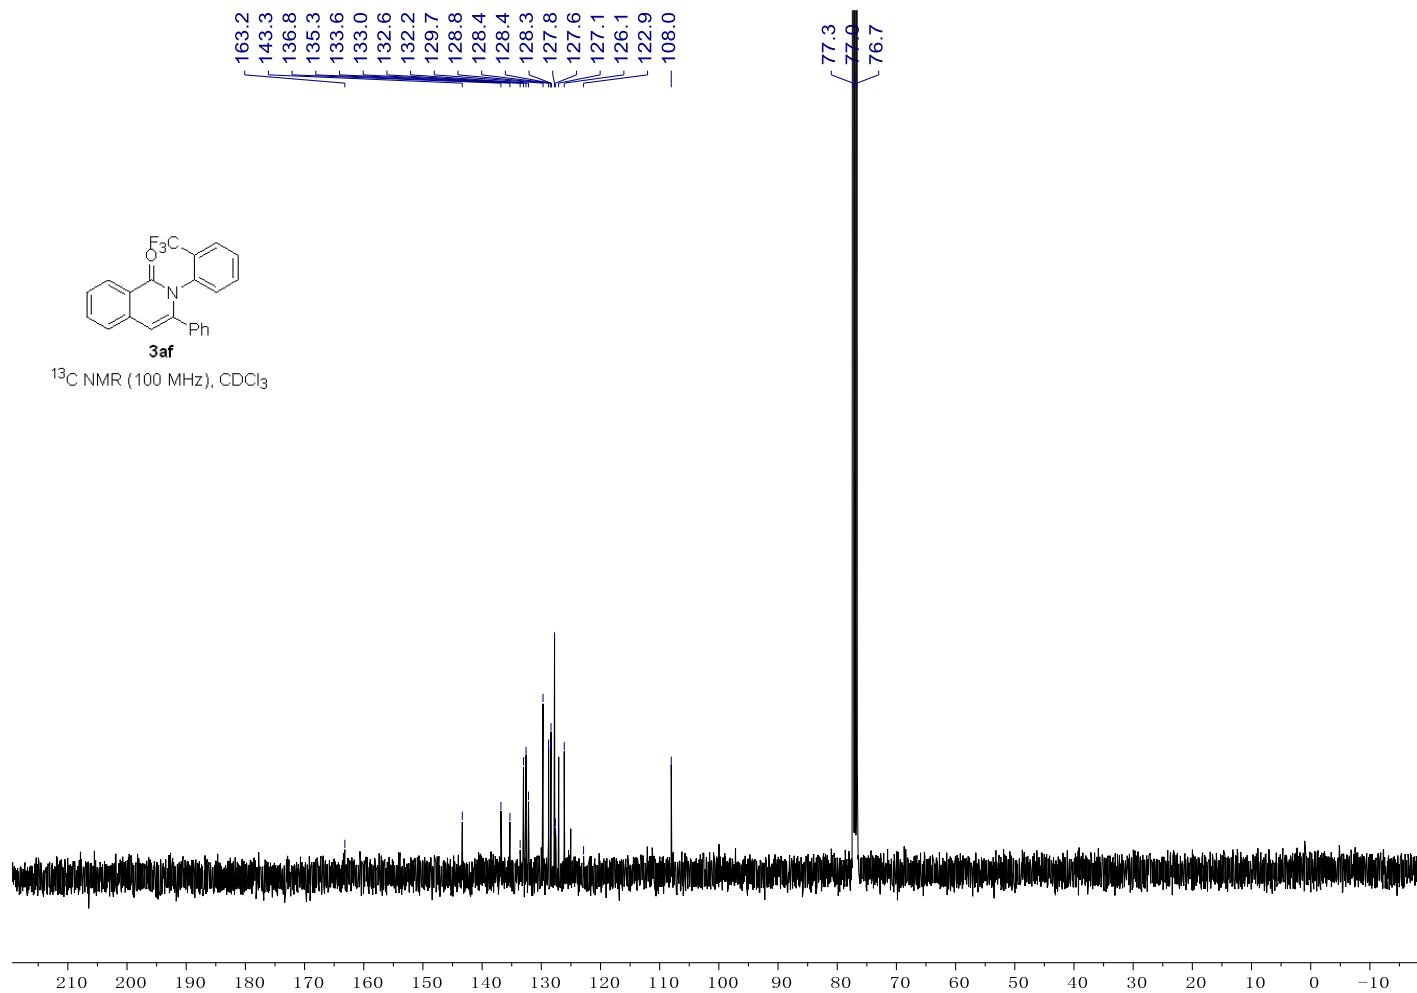

**<sup>1</sup>H NMR of 3-phenyl-2-(*m*-tolyl)isoquinolin-1(2*H*)-one (3ag)**

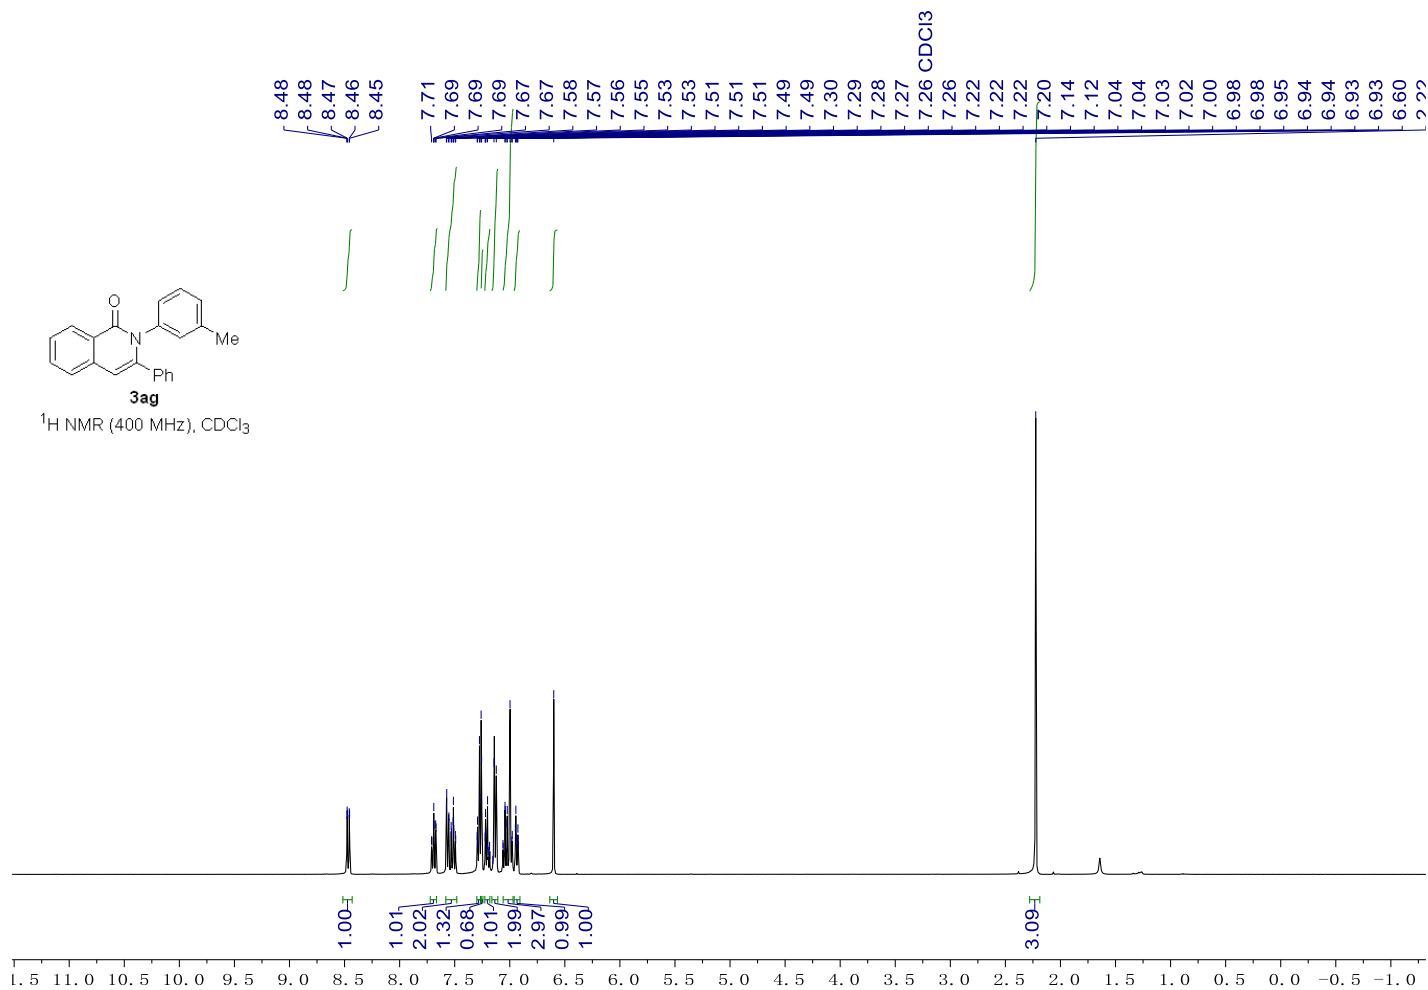



**<sup>13</sup>C NMR of 3-phenyl-2-(*m*-tolyl)isoquinolin-1(2*H*)-one (3ag)**

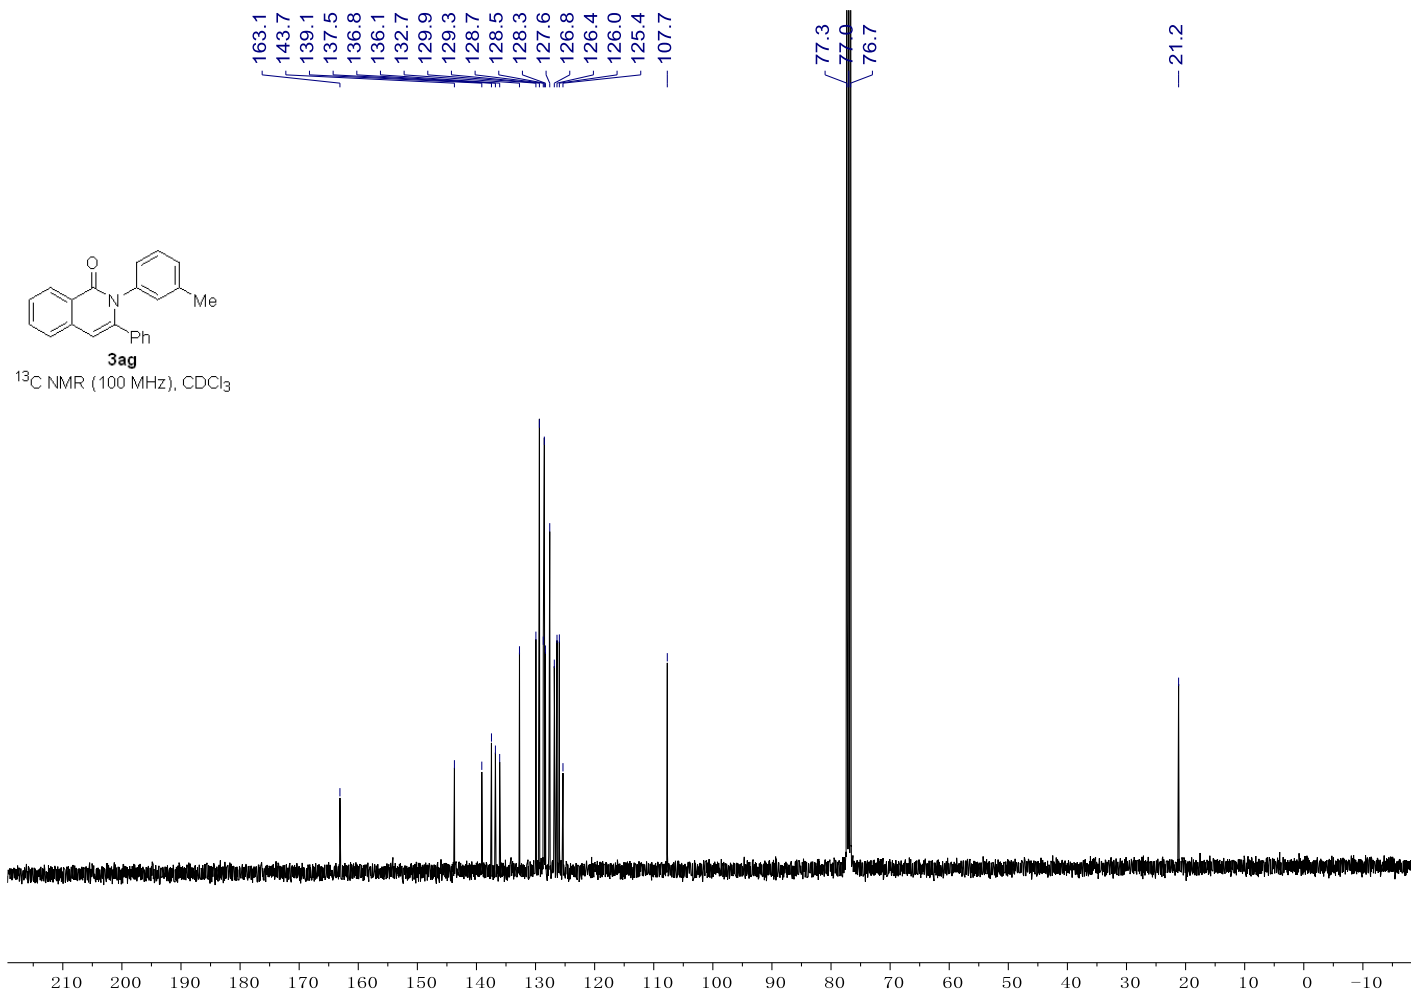

**<sup>1</sup>H NMR of 7-methoxy-2,3-diphenylisoquinolin-1(2H)-one (3ah)**

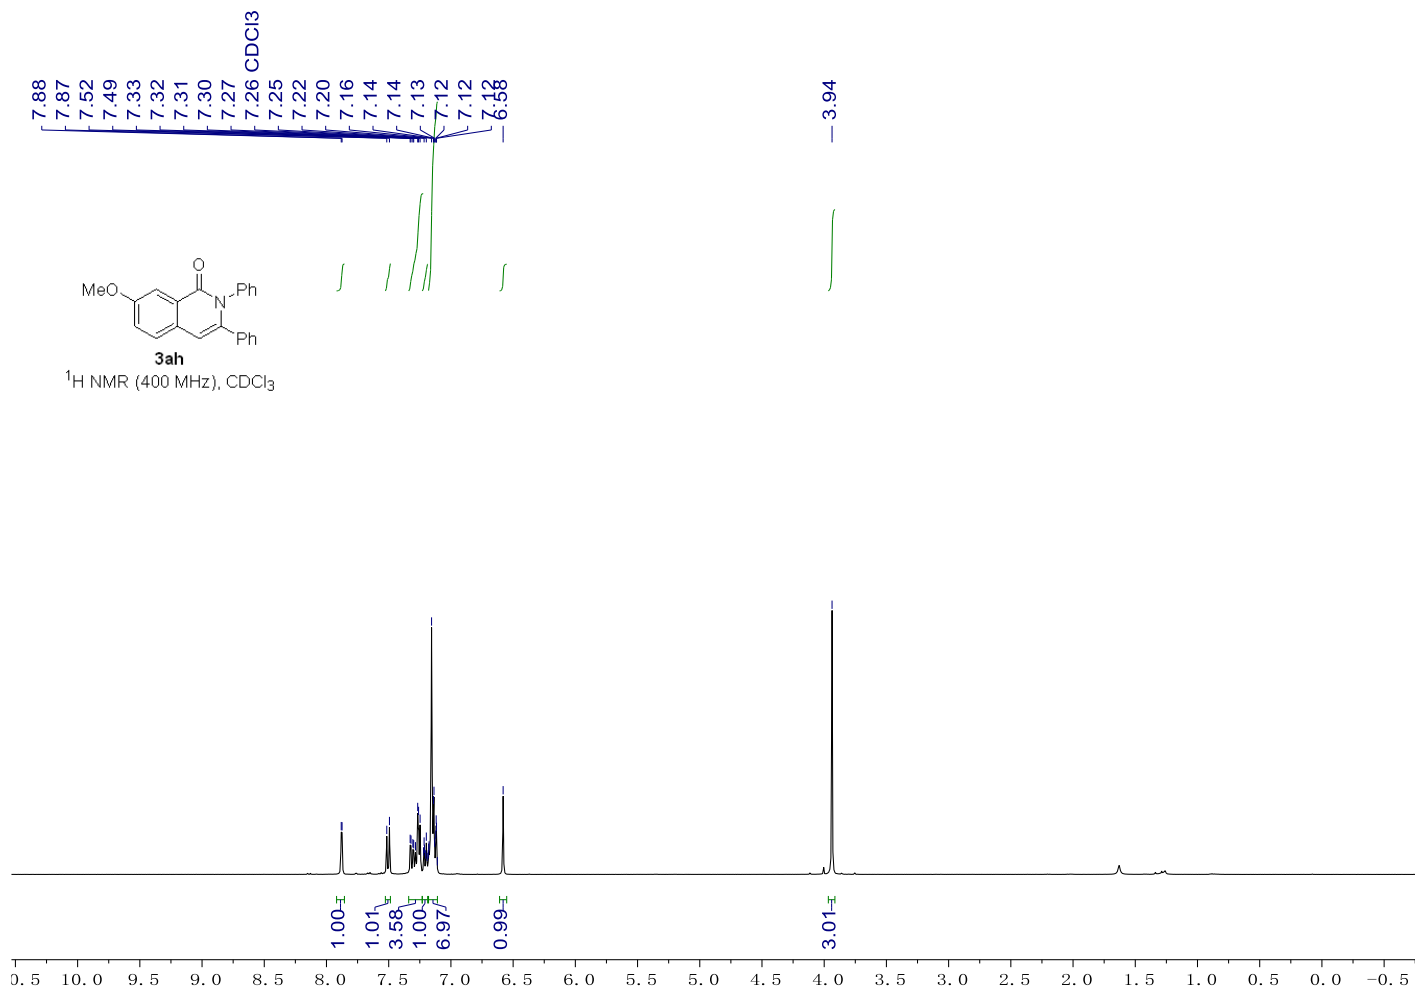

**<sup>13</sup>C NMR of 7-methoxy-2,3-diphenylisoquinolin-1(2*H*)-one (3ah)**

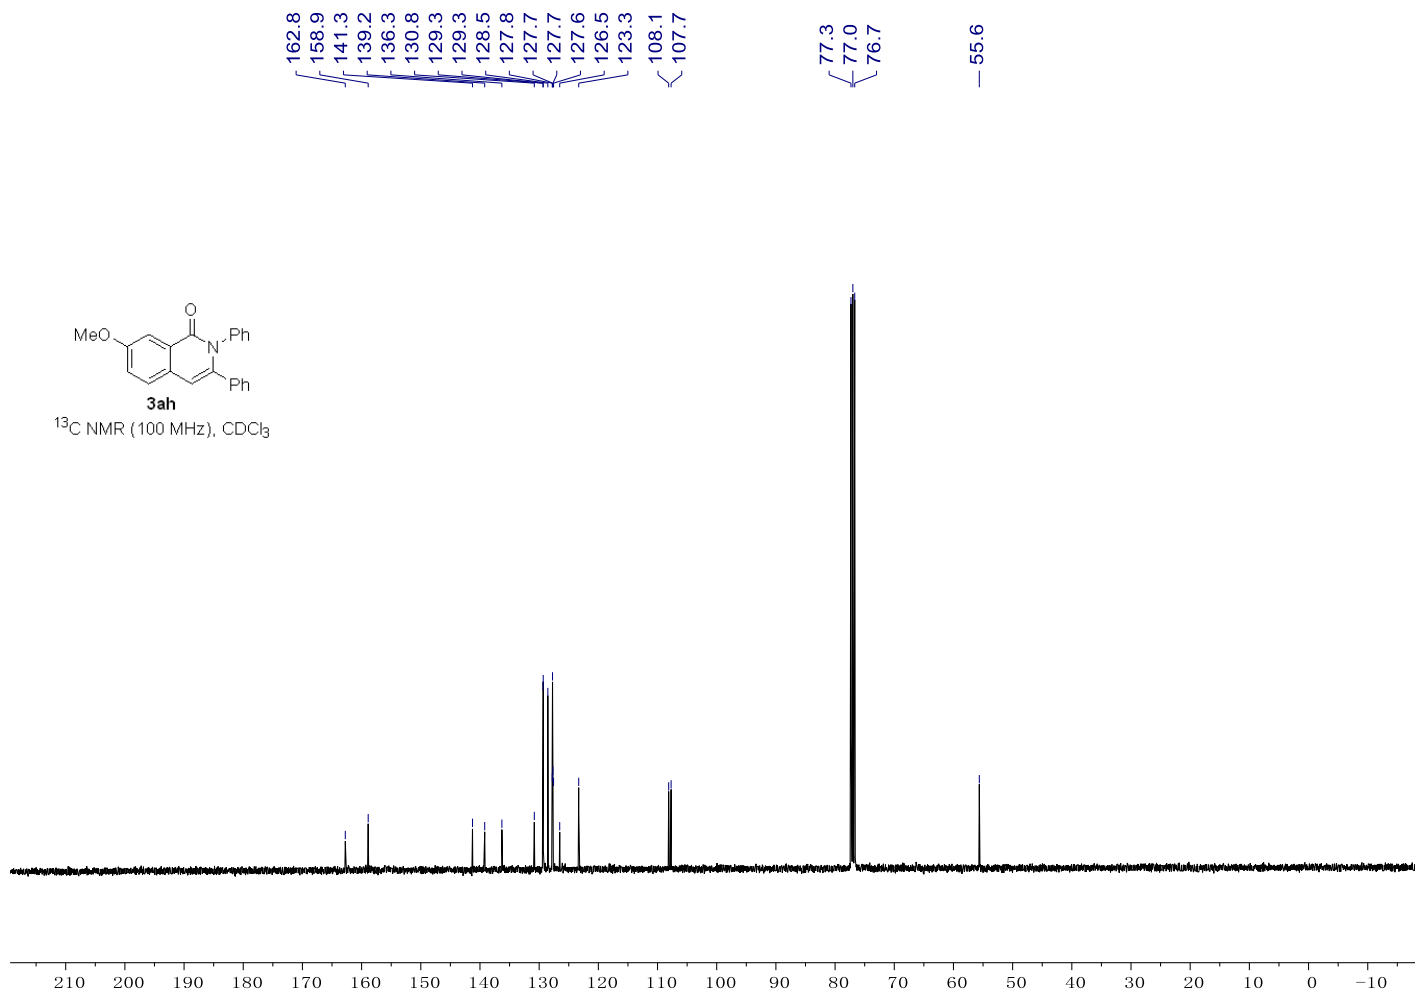

**<sup>1</sup>H NMR of 7-chloro-2,3-diphenylisoquinolin-1(2H)-one (3ai)**

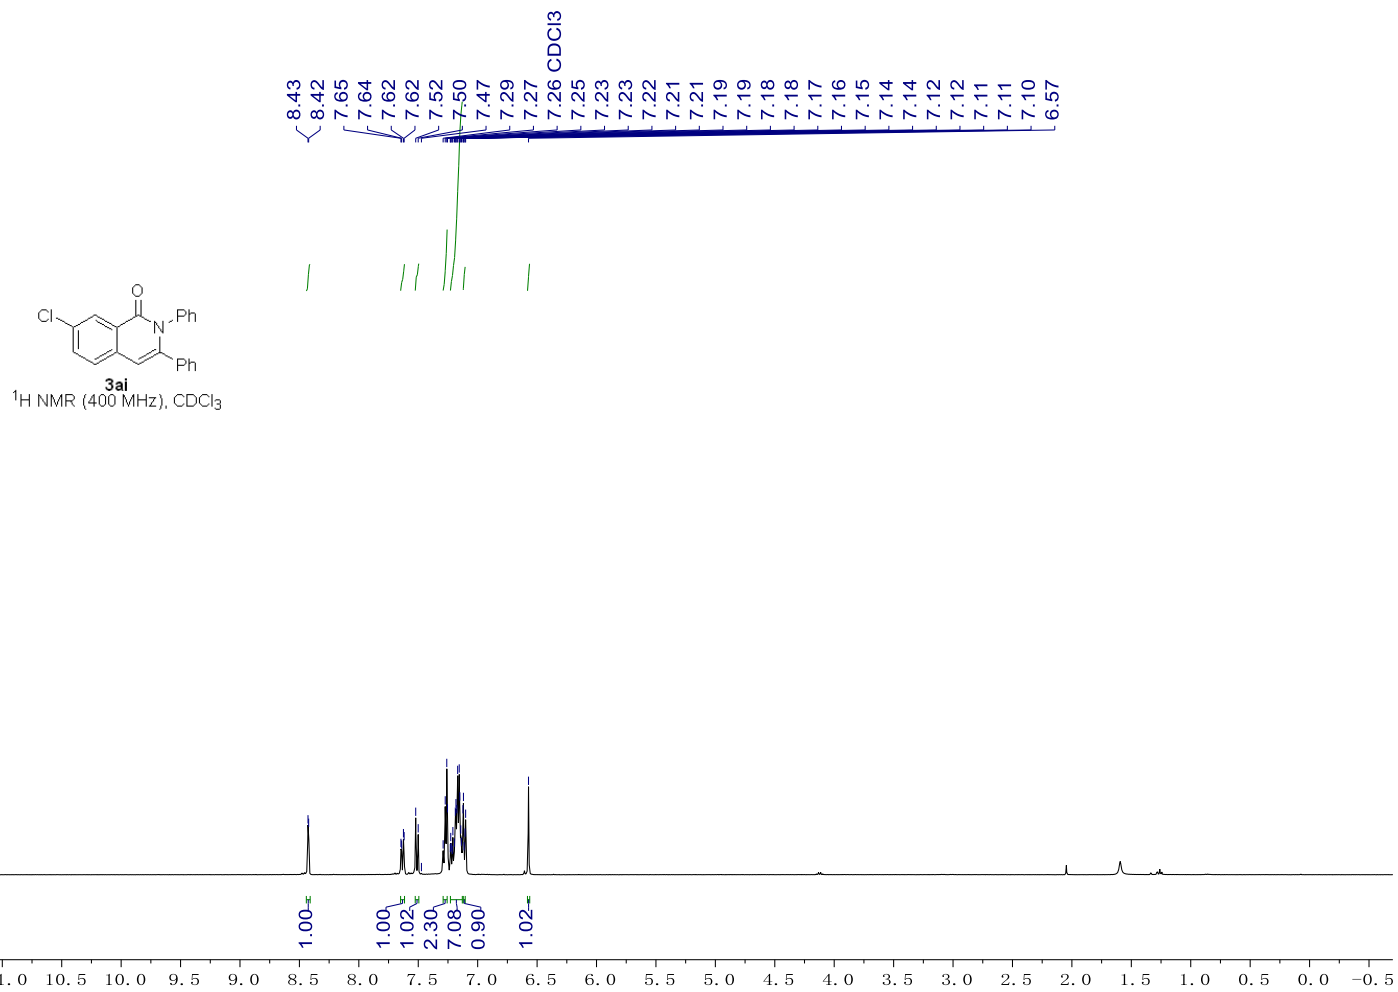

**<sup>13</sup>C NMR of 7-chloro-2,3-diphenylisoquinolin-1(2H)-one (3ai)**

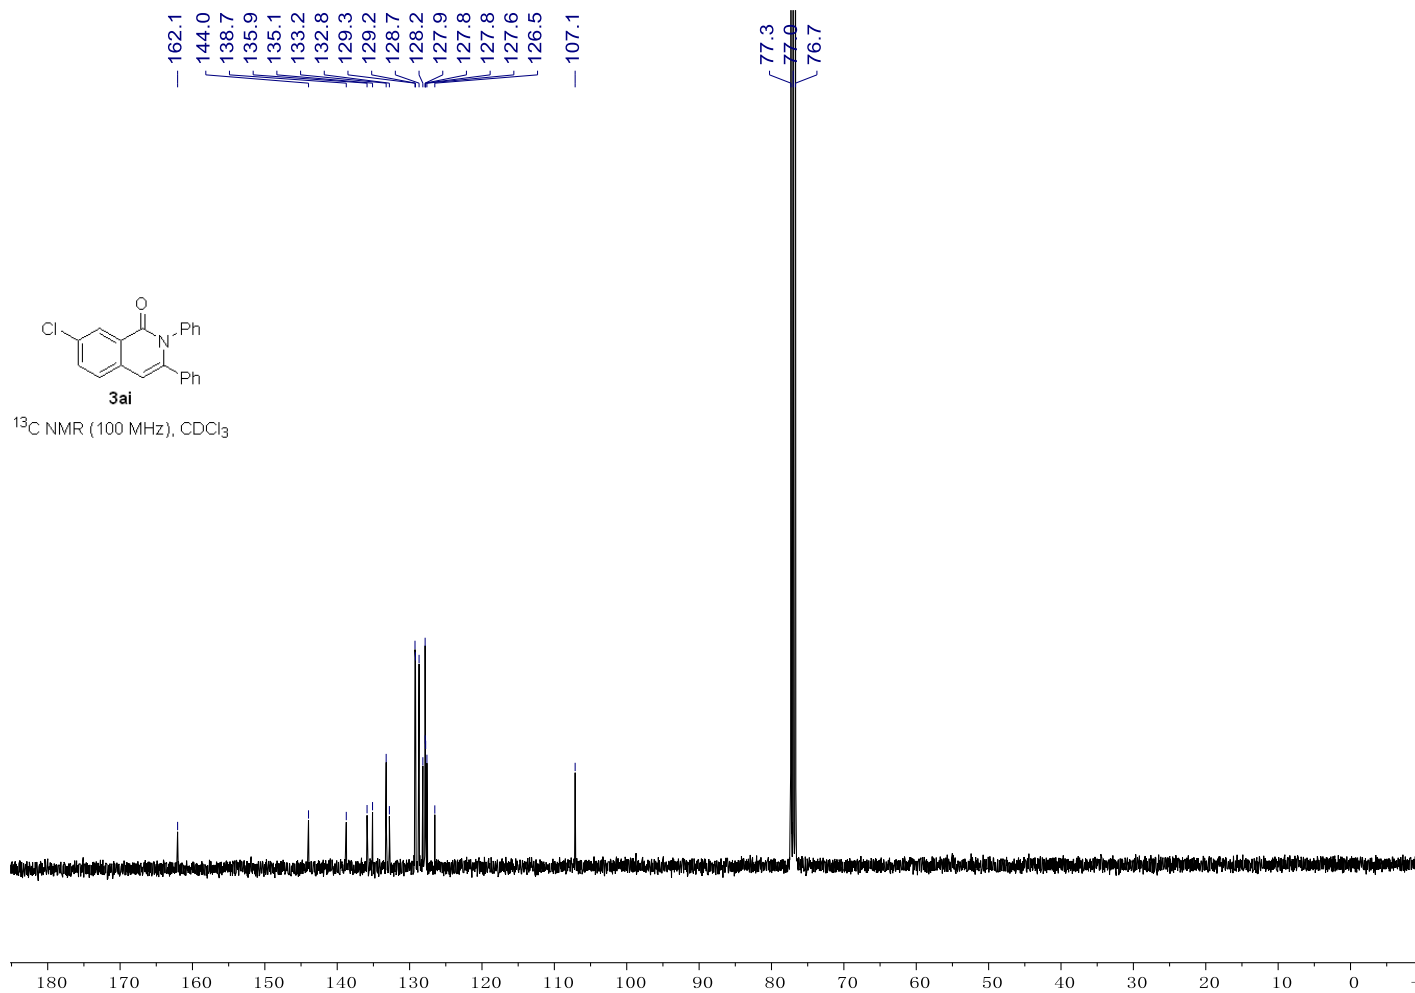

**<sup>1</sup>H NMR of 6-chloro-2,3-diphenylisoquinolin-1(2H)-one (3aj)**

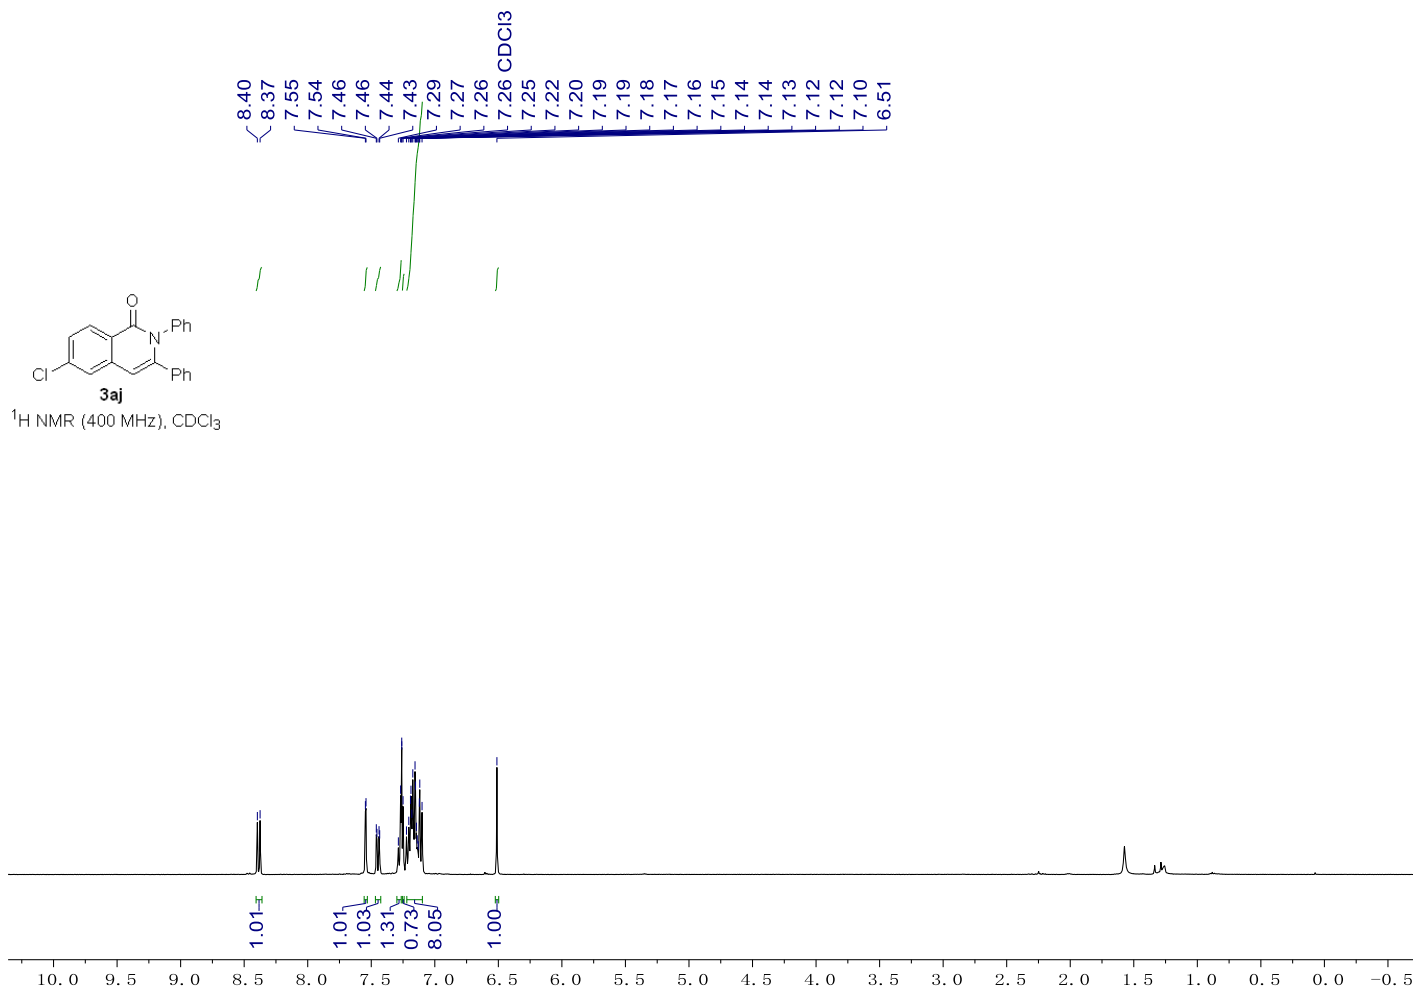

**<sup>13</sup>C NMR of 6-chloro-2,3-diphenylisoquinolin-1(2H)-one (3aj)**

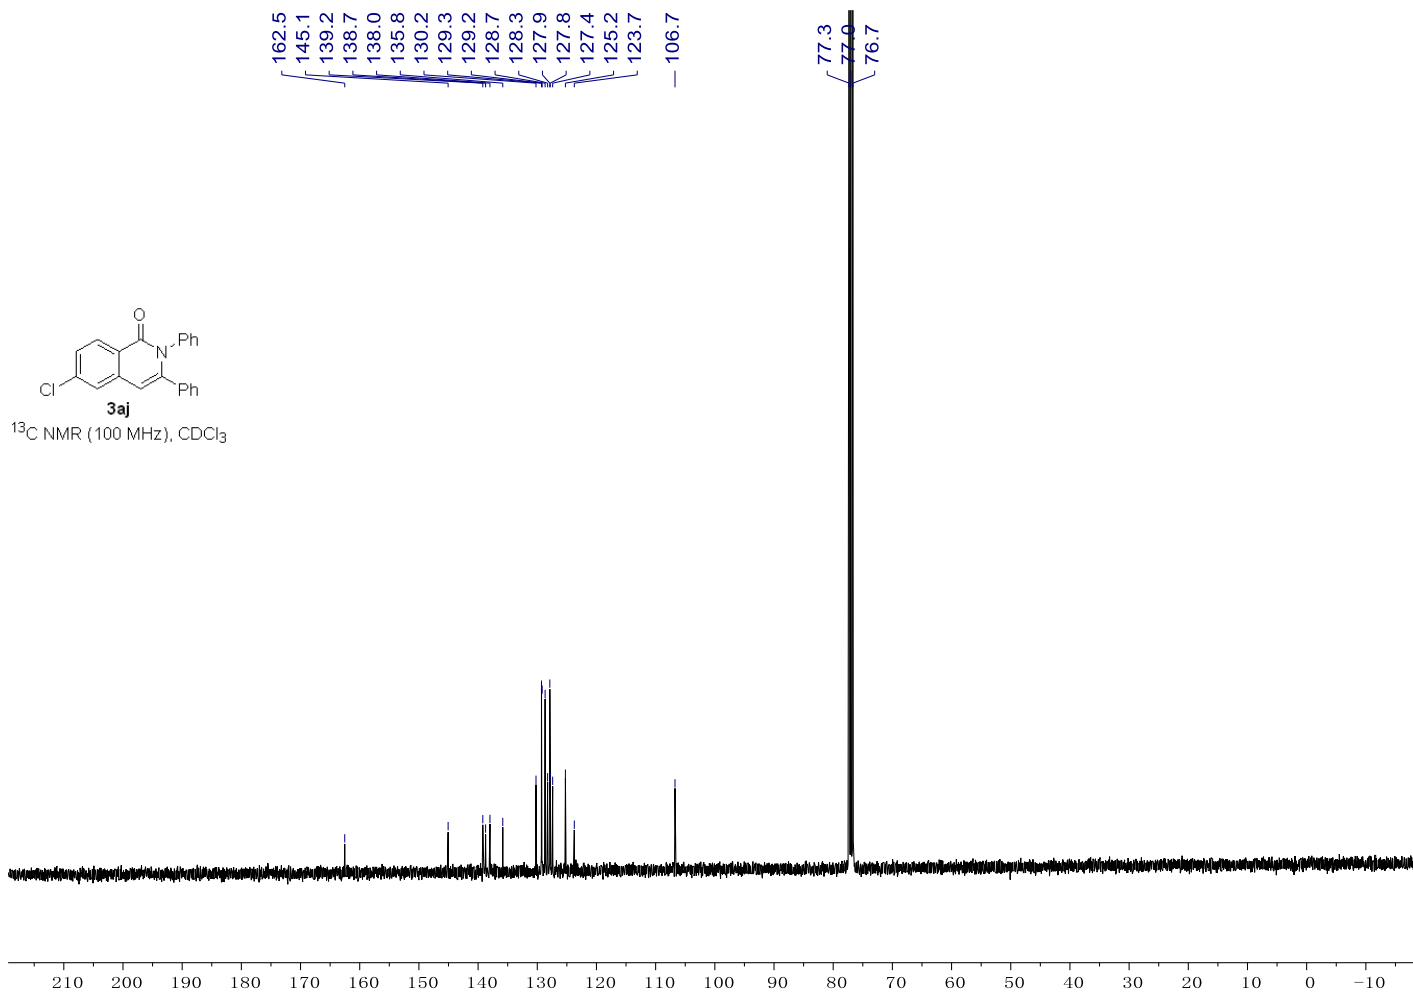

**<sup>1</sup>H NMR of methyl 1-oxo-2,3-diphenyl-1,2-dihydroisoquinoline-6-carboxylate (3ak)**

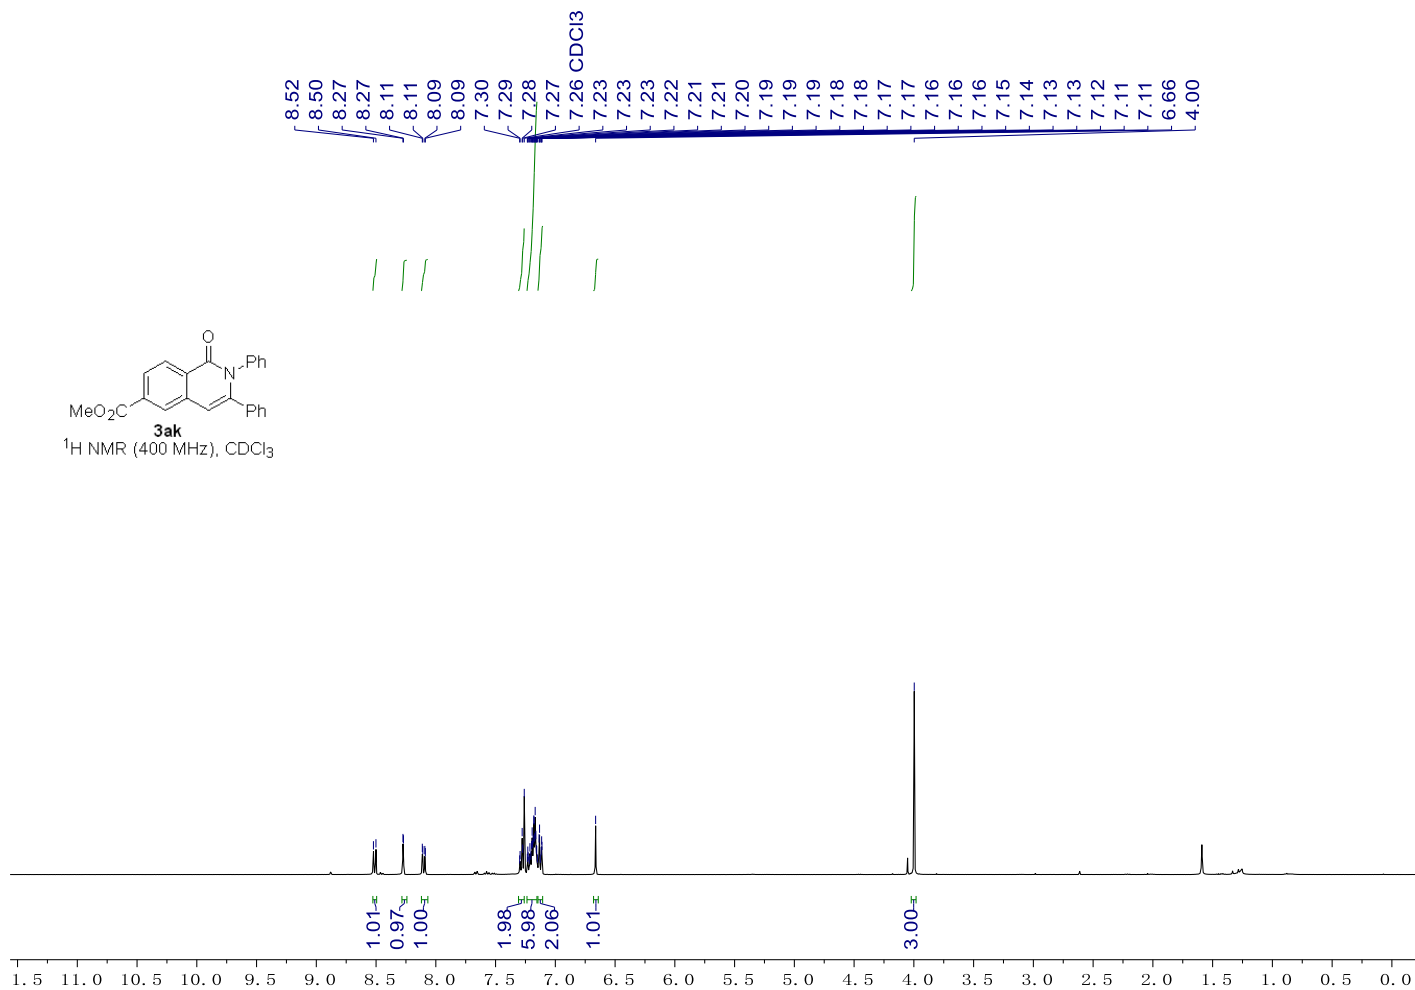



**<sup>13</sup>C NMR of methyl 1-oxo-2,3-diphenyl-1,2-dihydroisoquinoline-6-carboxylate (3ak)**

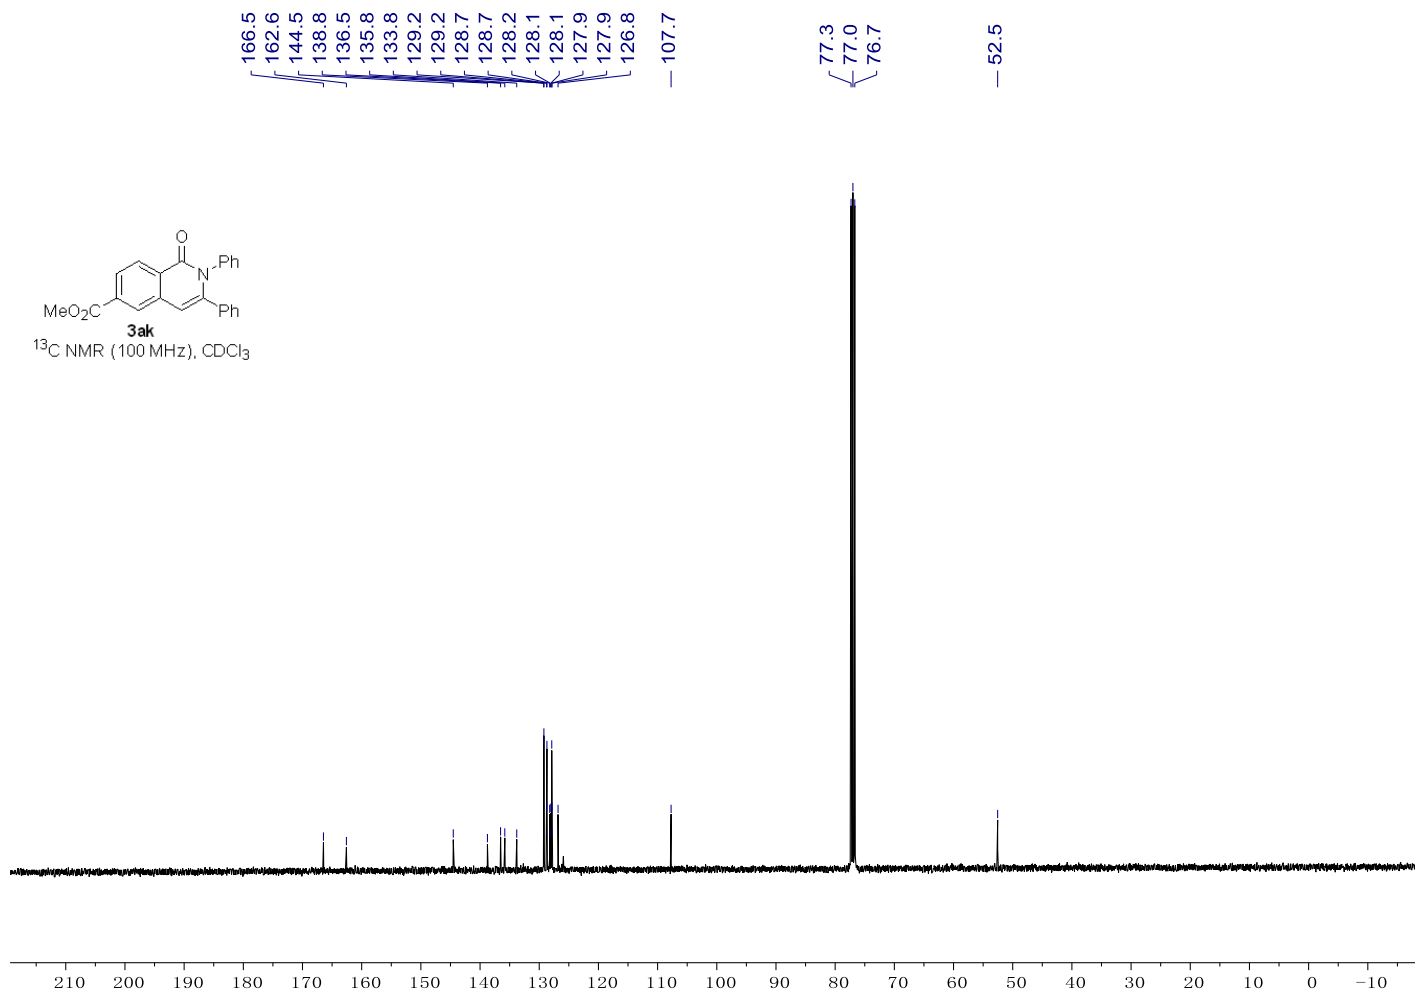

**<sup>1</sup>H NMR of 5-chloro-2,3-diphenylisoquinolin-1(2H)-one (3al)**

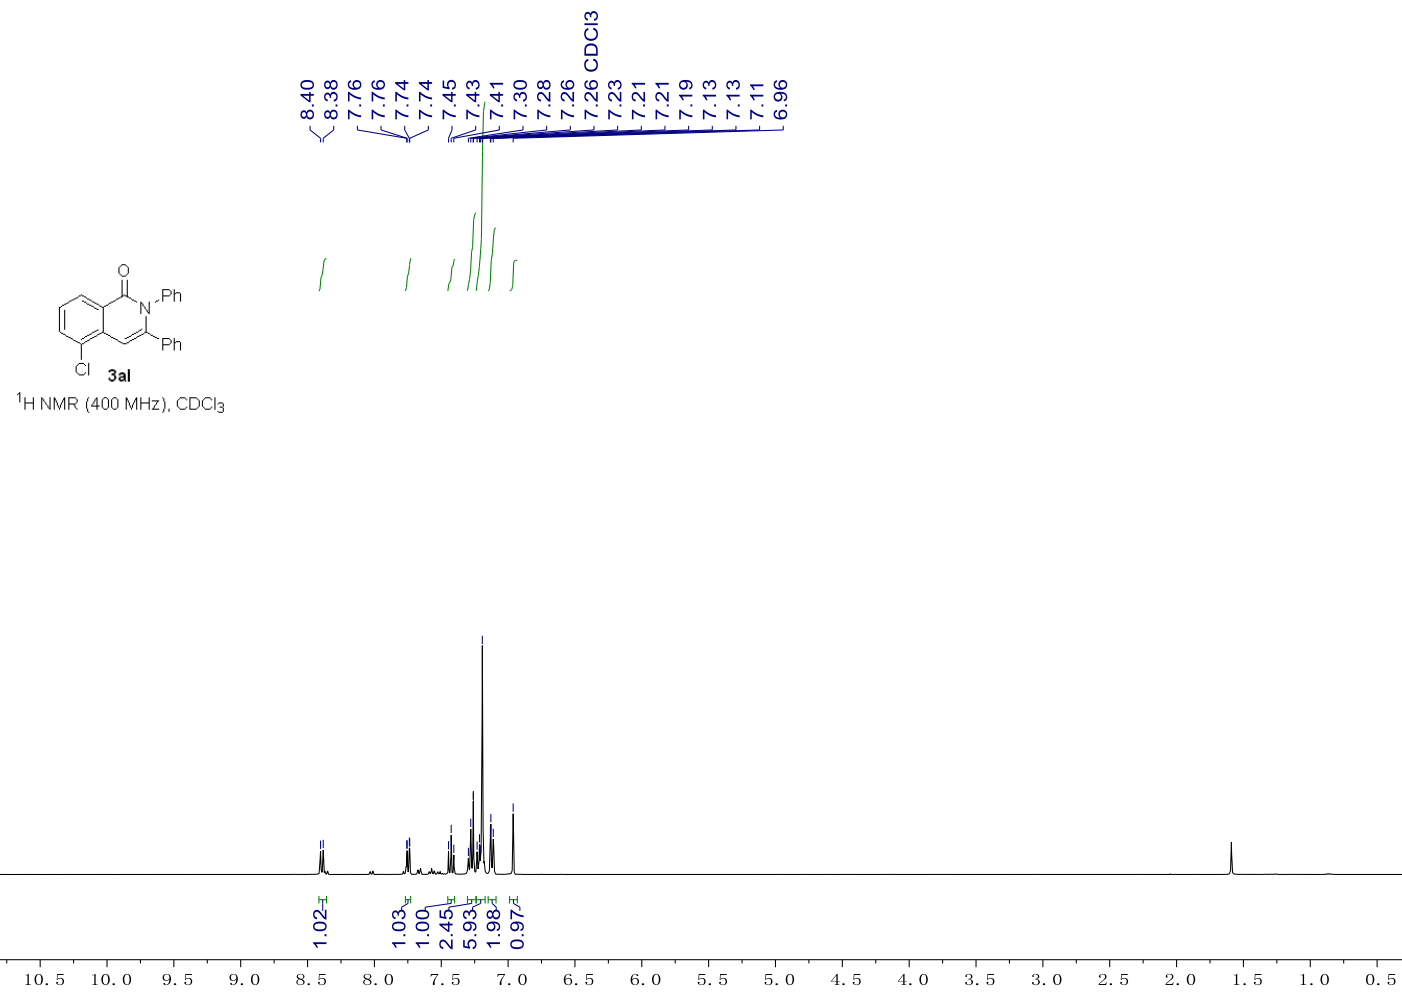

**<sup>13</sup>C NMR of 5-chloro-2,3-diphenylisoquinolin-1(2*H*)-one (3a)**

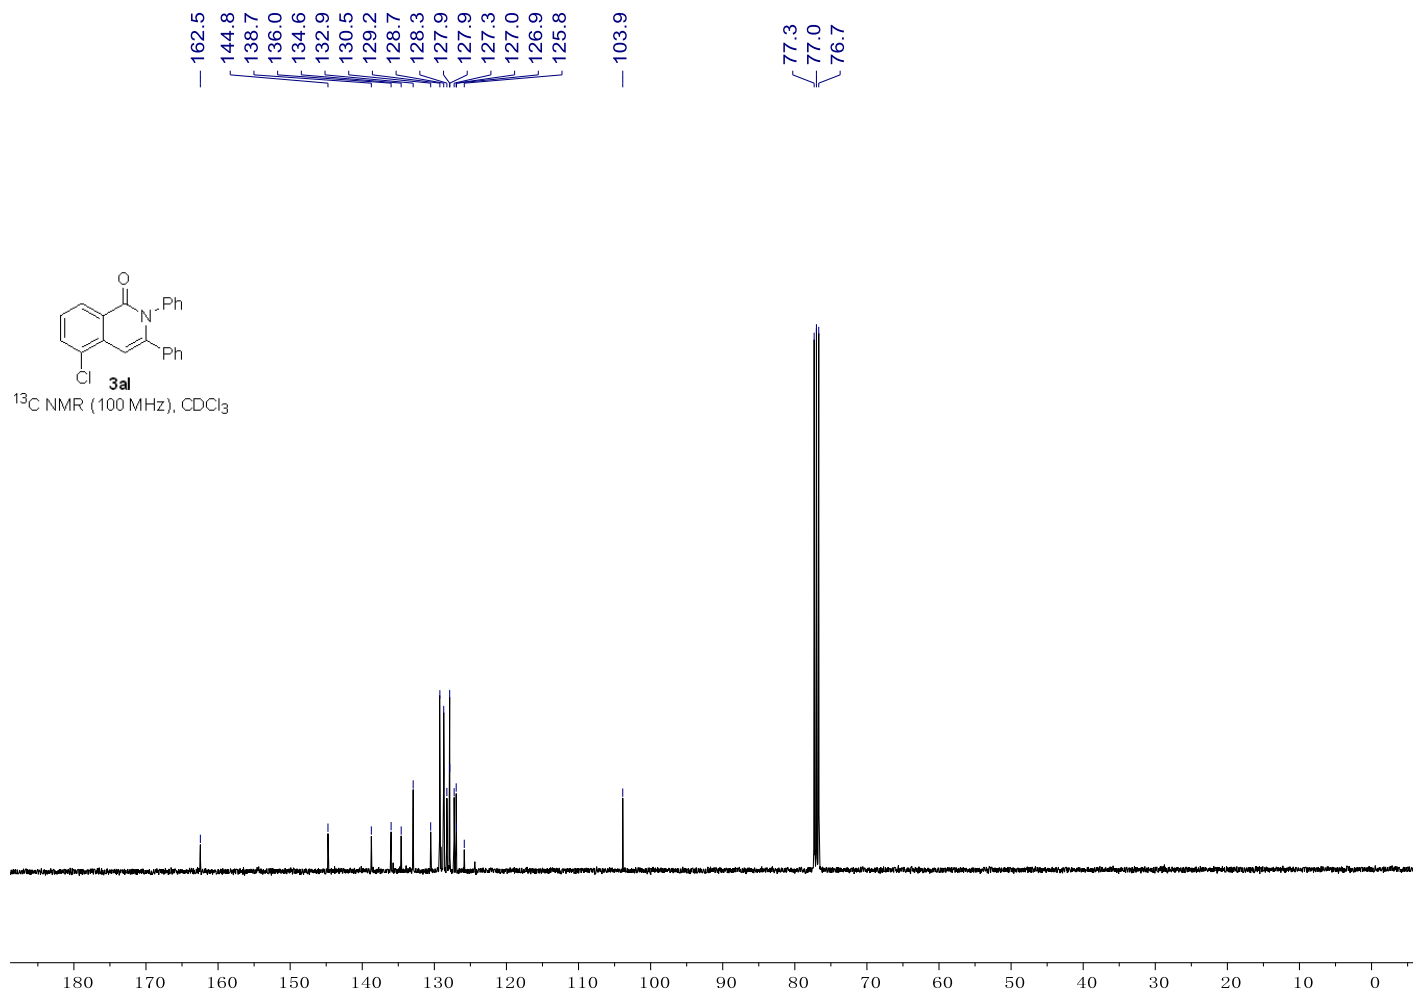

**<sup>1</sup>H NMR of 3-(4-methoxyphenyl)-2-phenylisoquinolin-1(2H)-one (3ba)**

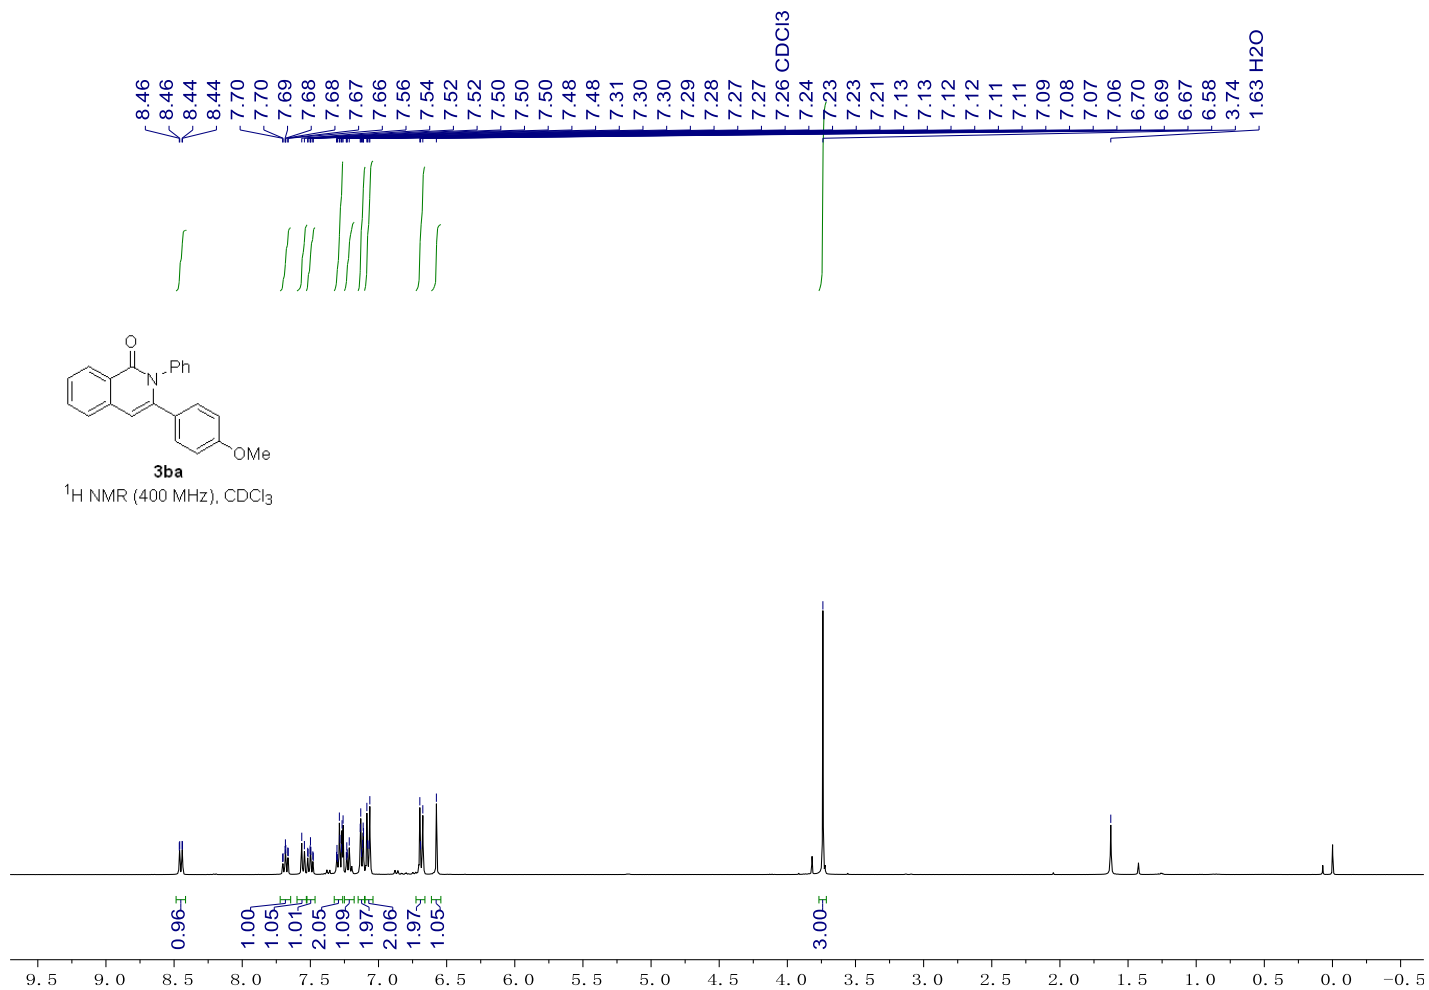

**<sup>13</sup>C NMR of 3-(4-methoxyphenyl)-2-phenylisoquinolin-1(2H)-one (3ba)**

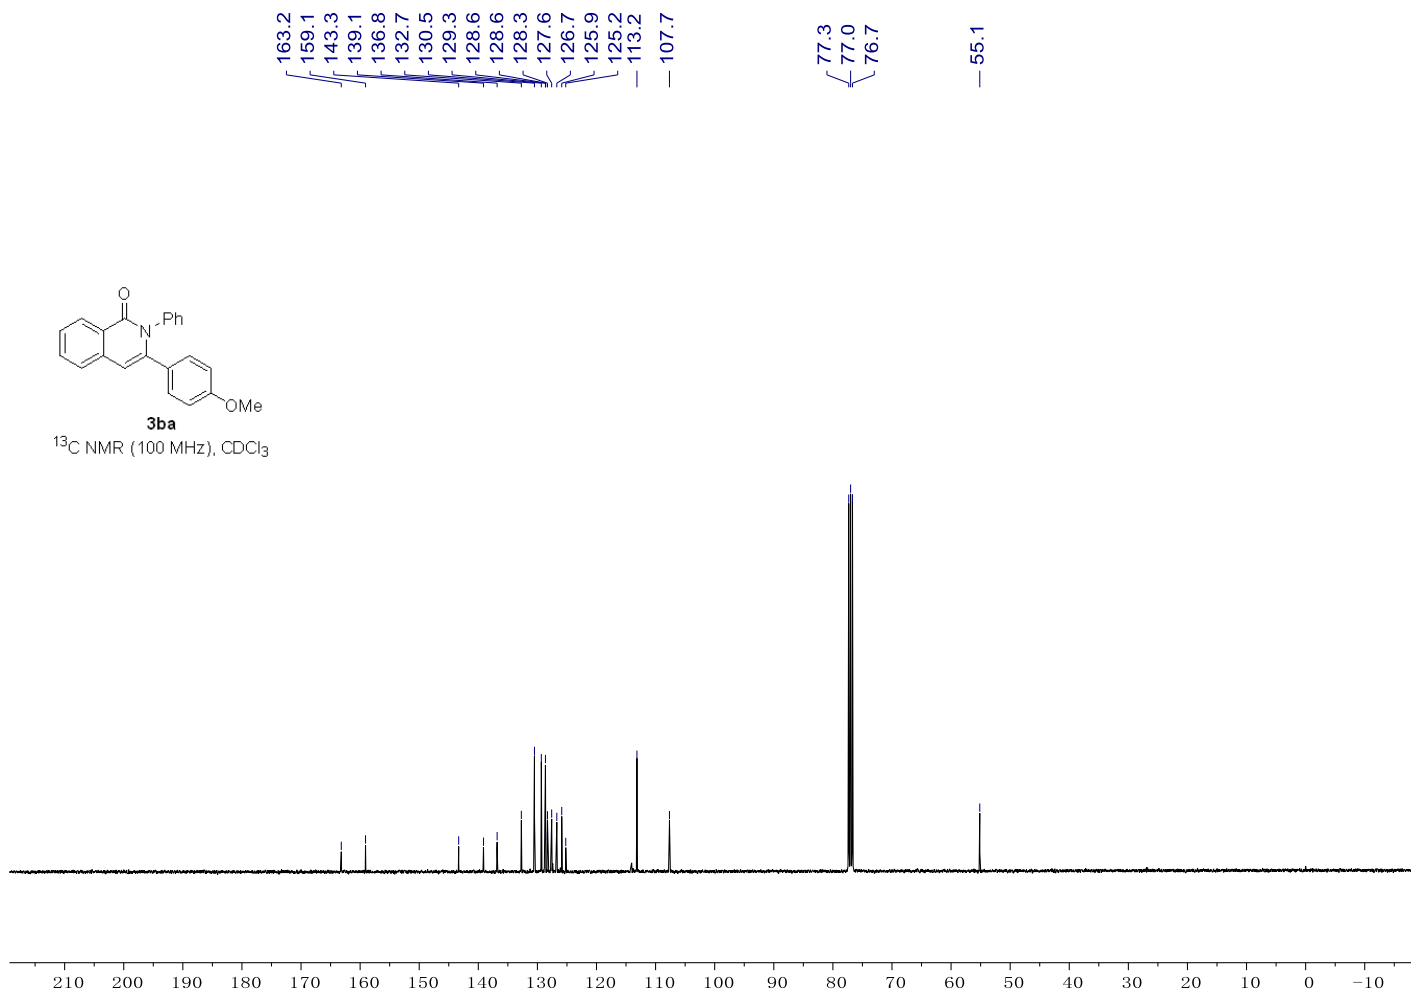

**<sup>1</sup>H NMR of 3-(4-fluorophenyl)-2-phenylisoquinolin-1(2H)-one (3ca)**

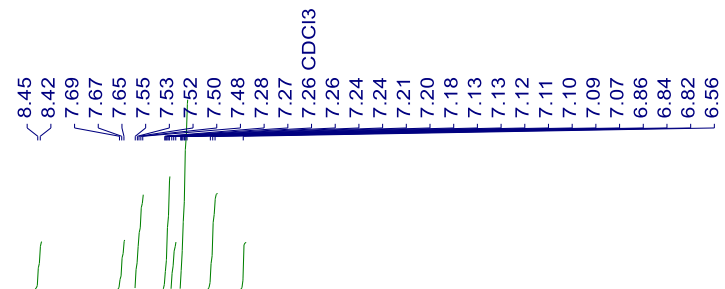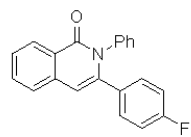

**3ca**

<sup>1</sup>H NMR (400 MHz), CDCl<sub>3</sub>

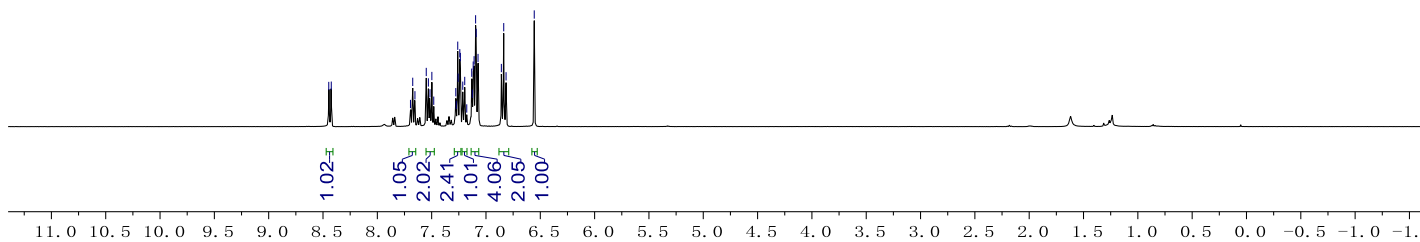

**<sup>13</sup>C NMR of 3-(4-fluorophenyl)-2-phenylisoquinolin-1(2H)-one (3ca)**

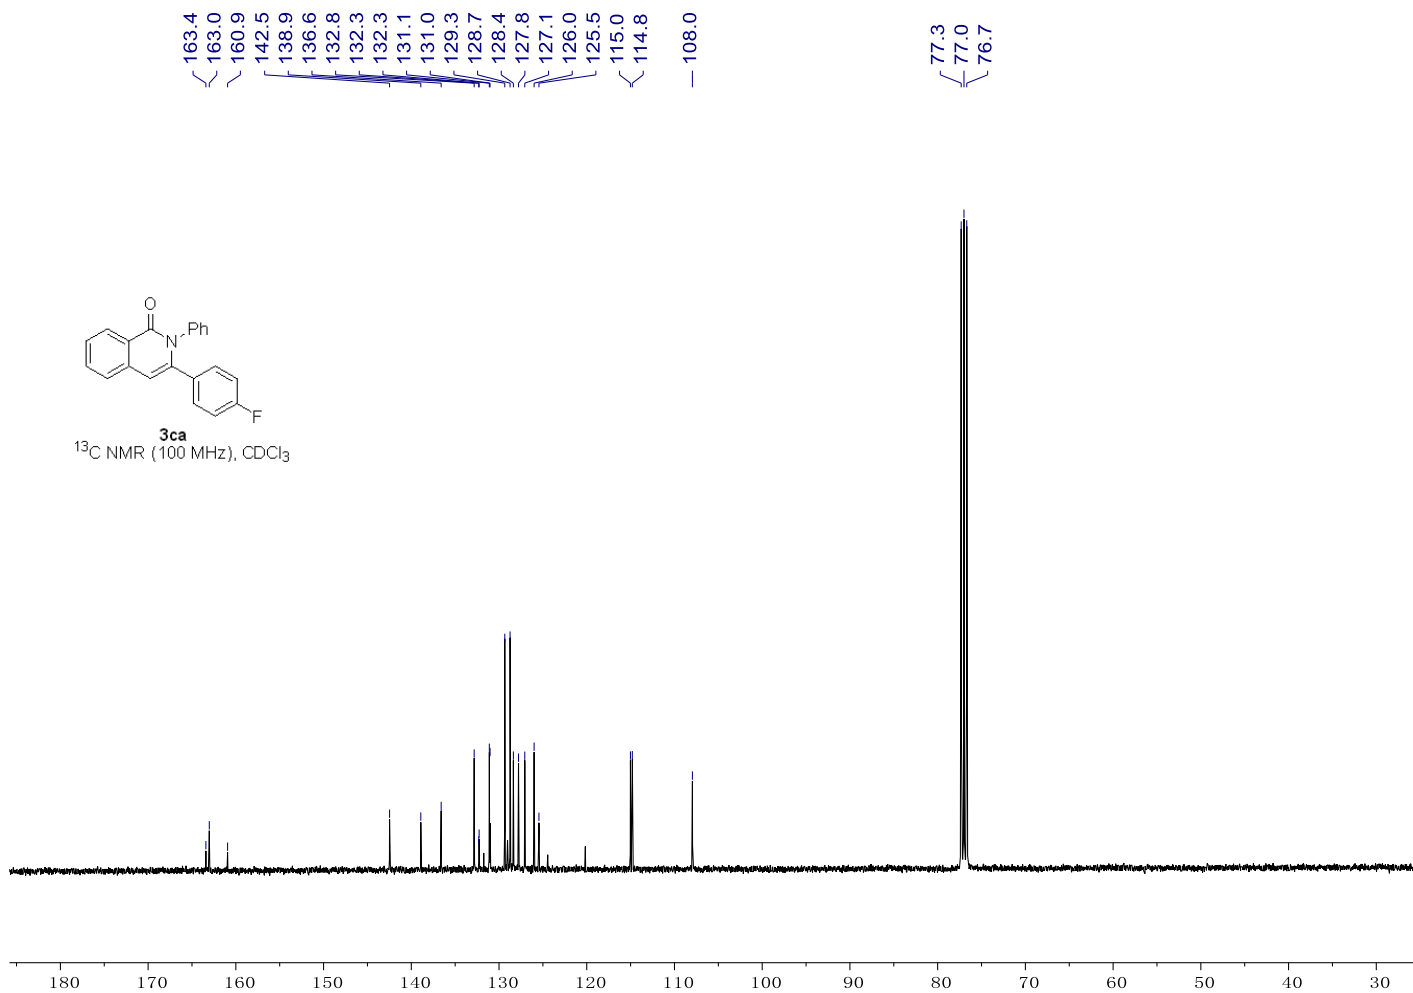

**<sup>1</sup>H NMR of 3-(4-chlorophenyl)-2-phenylisoquinolin-1(2H)-one (3da)**

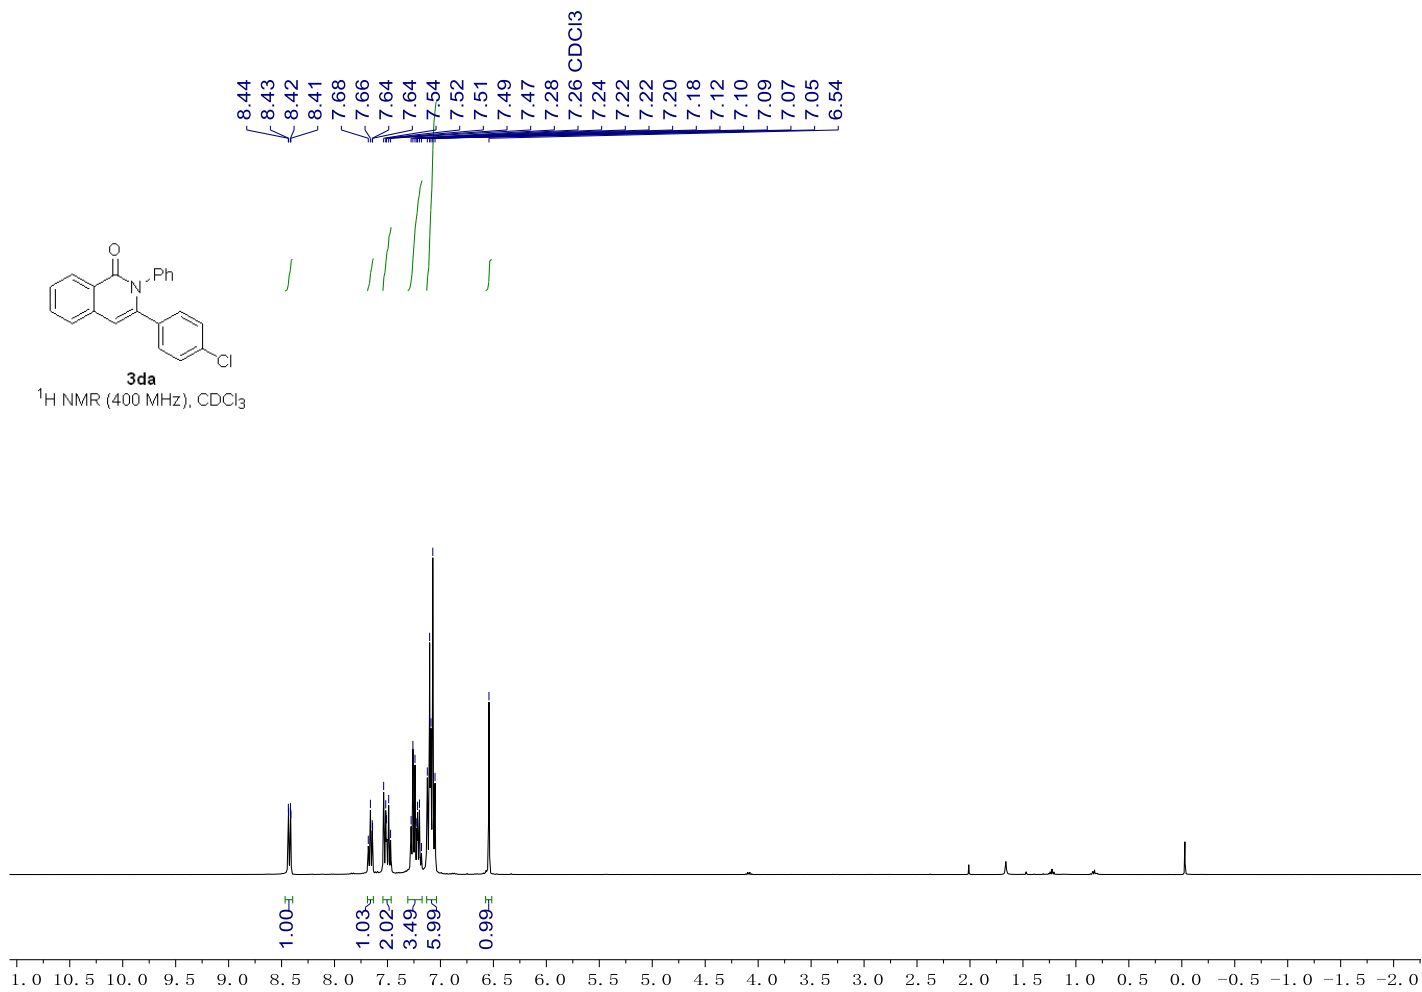



**<sup>13</sup>C NMR of 3-(4-chlorophenyl)-2-phenylisoquinolin-1(2H)-one (3da)**

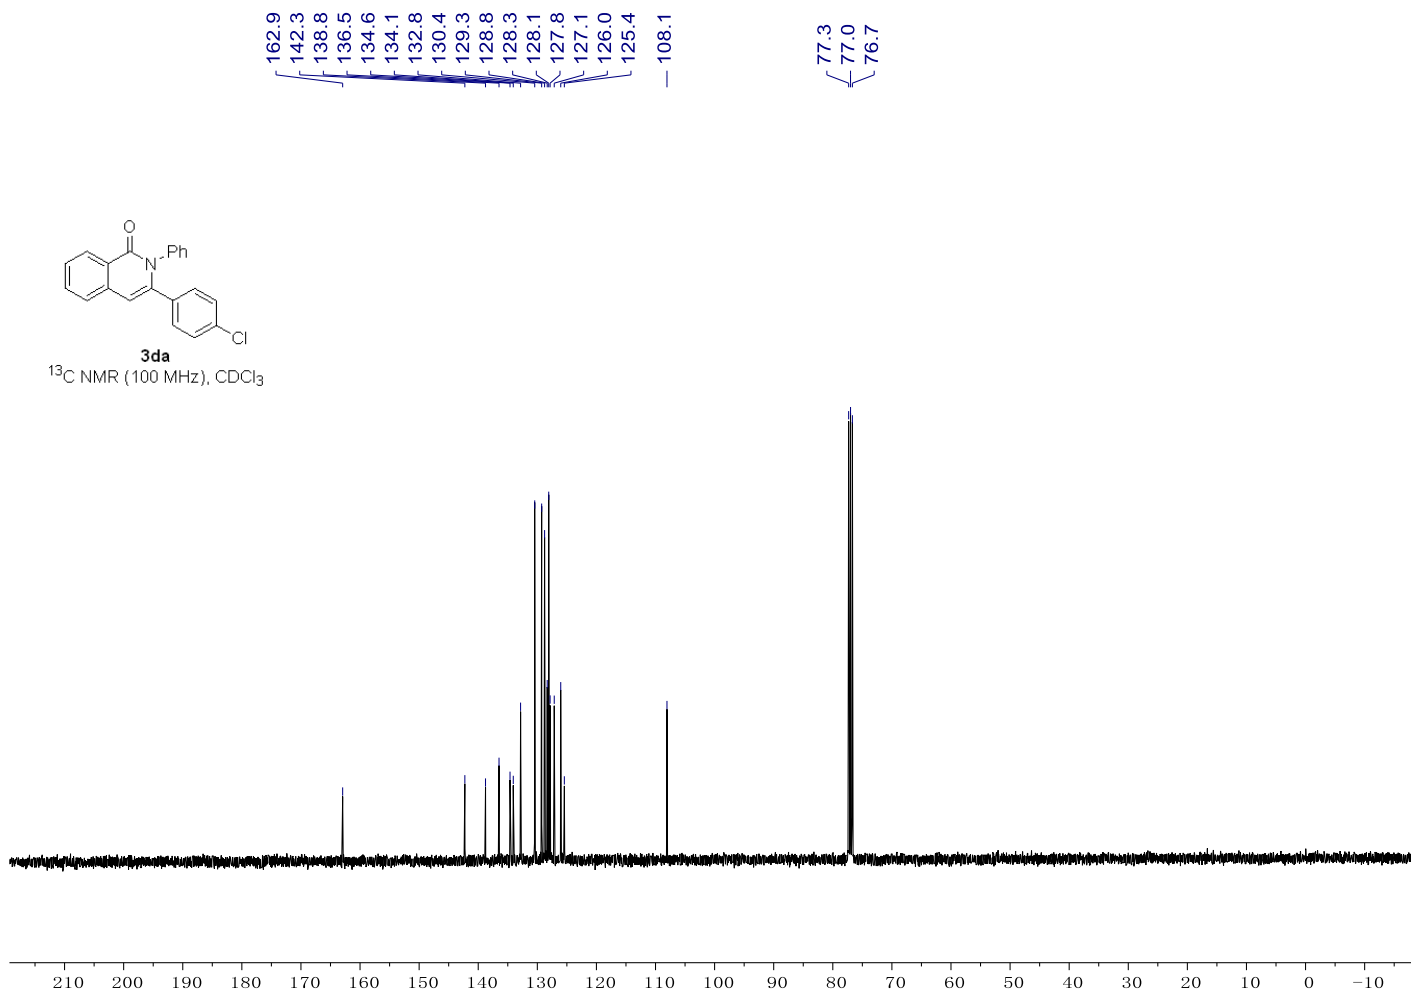

**<sup>1</sup>H NMR of 3-(4-bromophenyl)-2-phenylisoquinolin-1(2H)-one (3ea)**

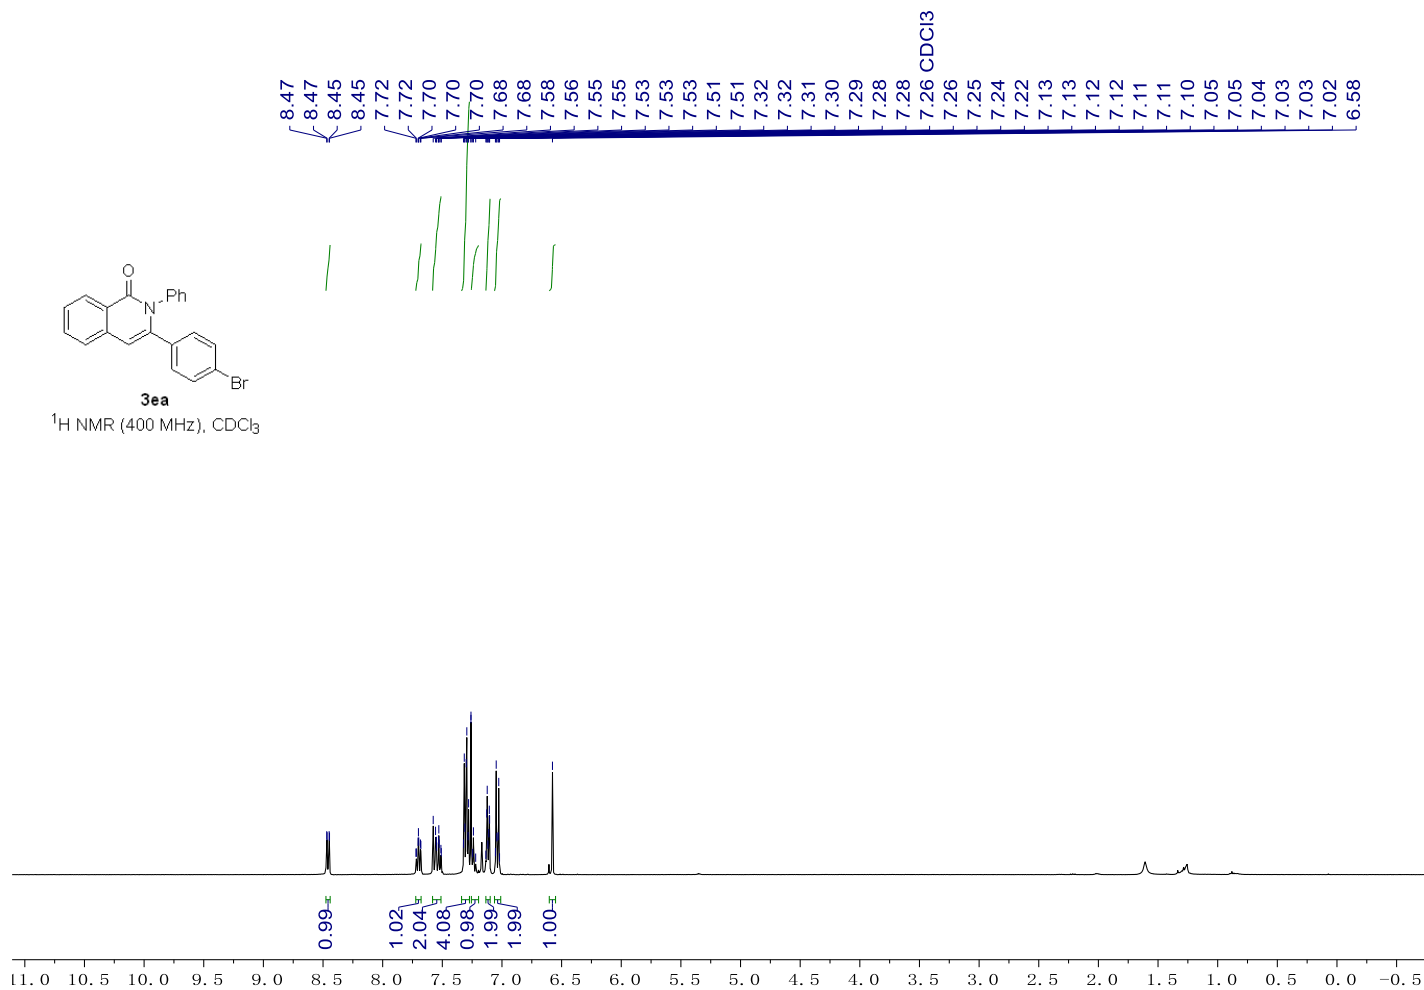

**<sup>13</sup>C NMR of 3-(4-bromophenyl)-2-phenylisoquinolin-1(2H)-one (3ea)**

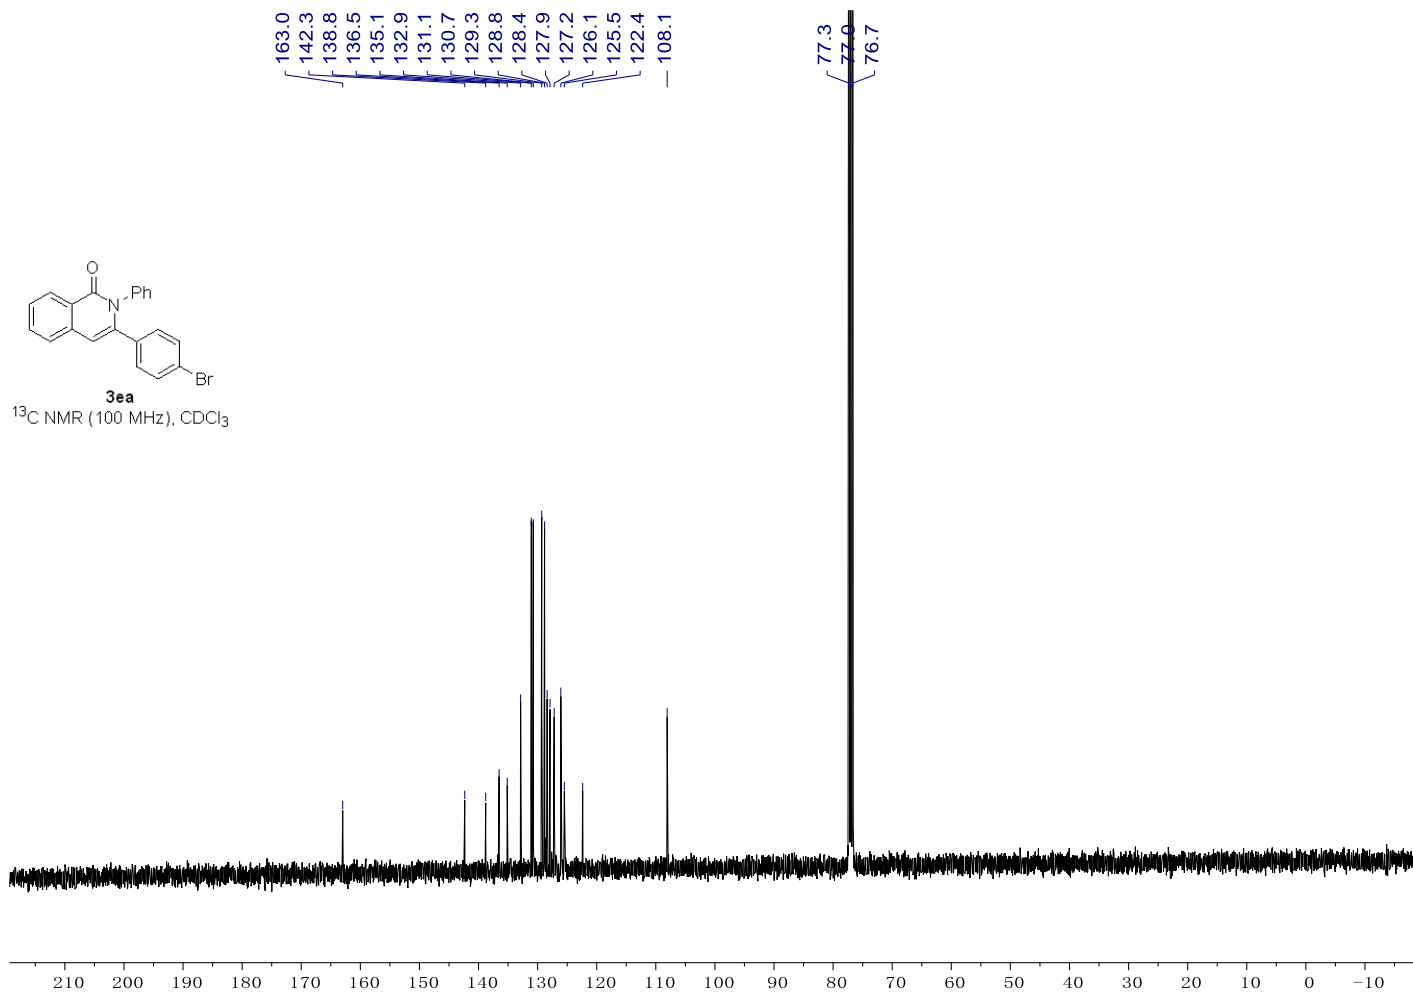

**<sup>1</sup>H NMR of 3-(2-methoxyphenyl)-2-phenylisoquinolin-1(2H)-one (3fa)**

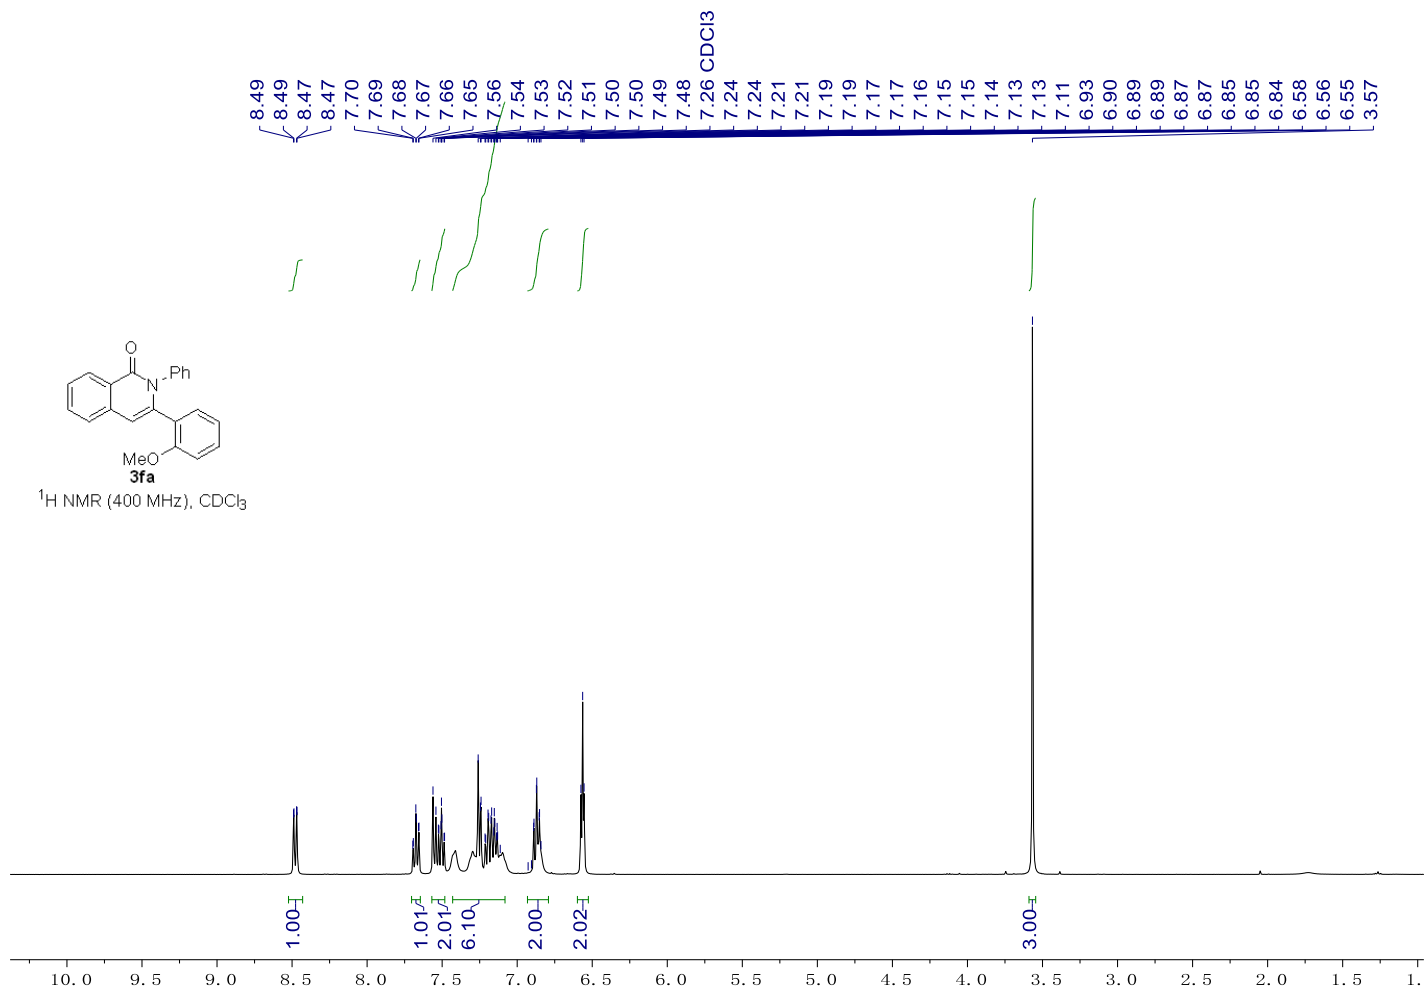

**<sup>13</sup>C NMR of 3-(2-methoxyphenyl)-2-phenylisoquinolin-1(2H)-one (3fa)**

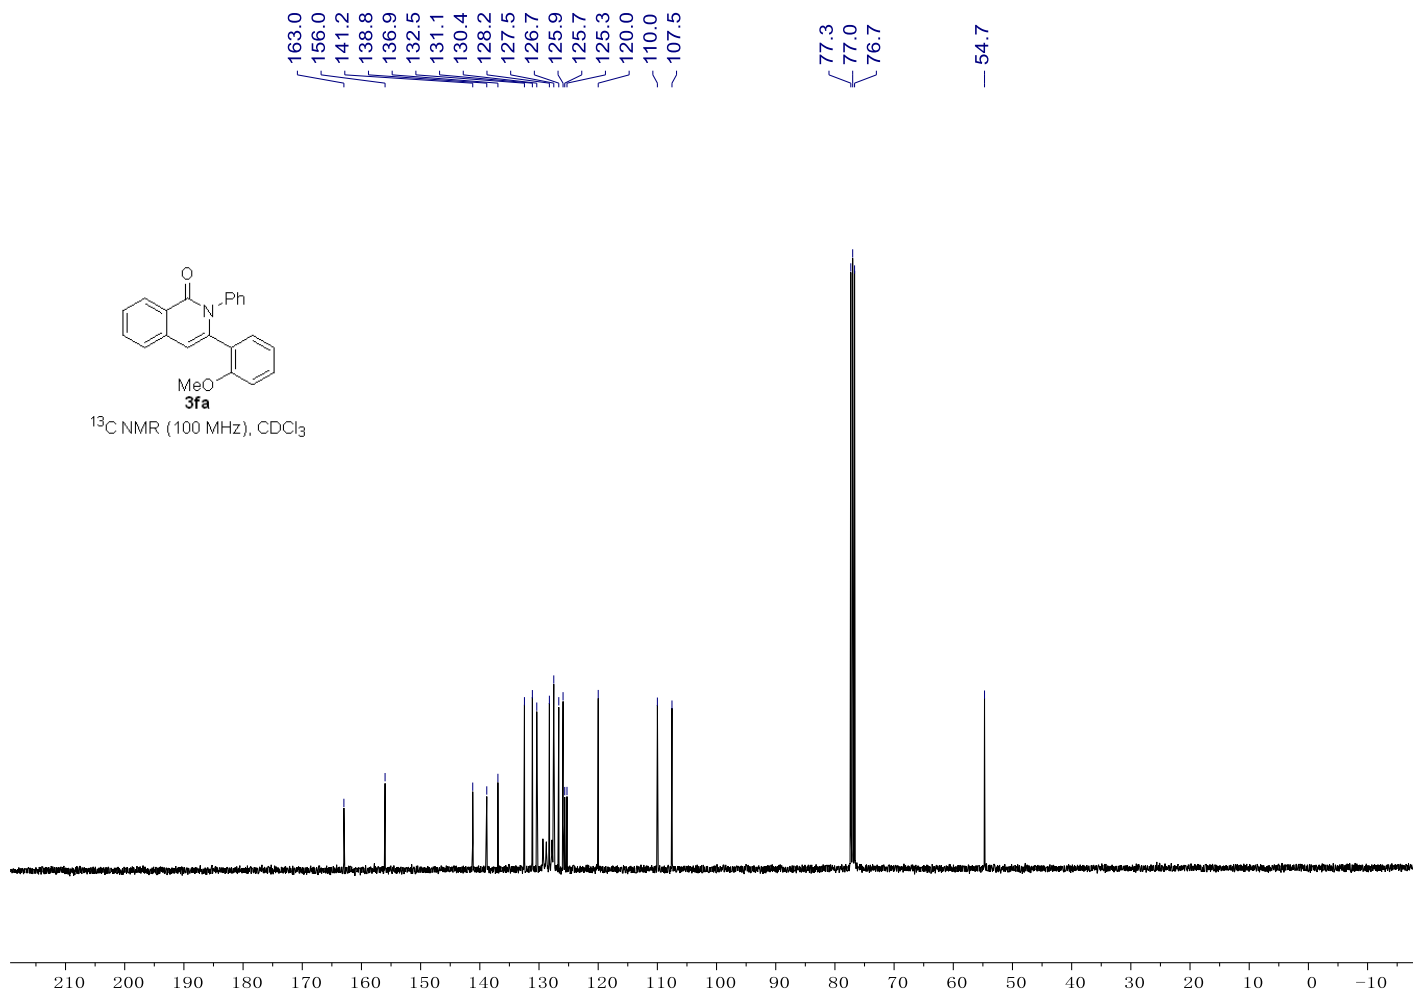

**<sup>1</sup>H NMR of 2-phenyl-3-(*o*-tolyl)isoquinolin-1(2*H*)-one (3ga)**

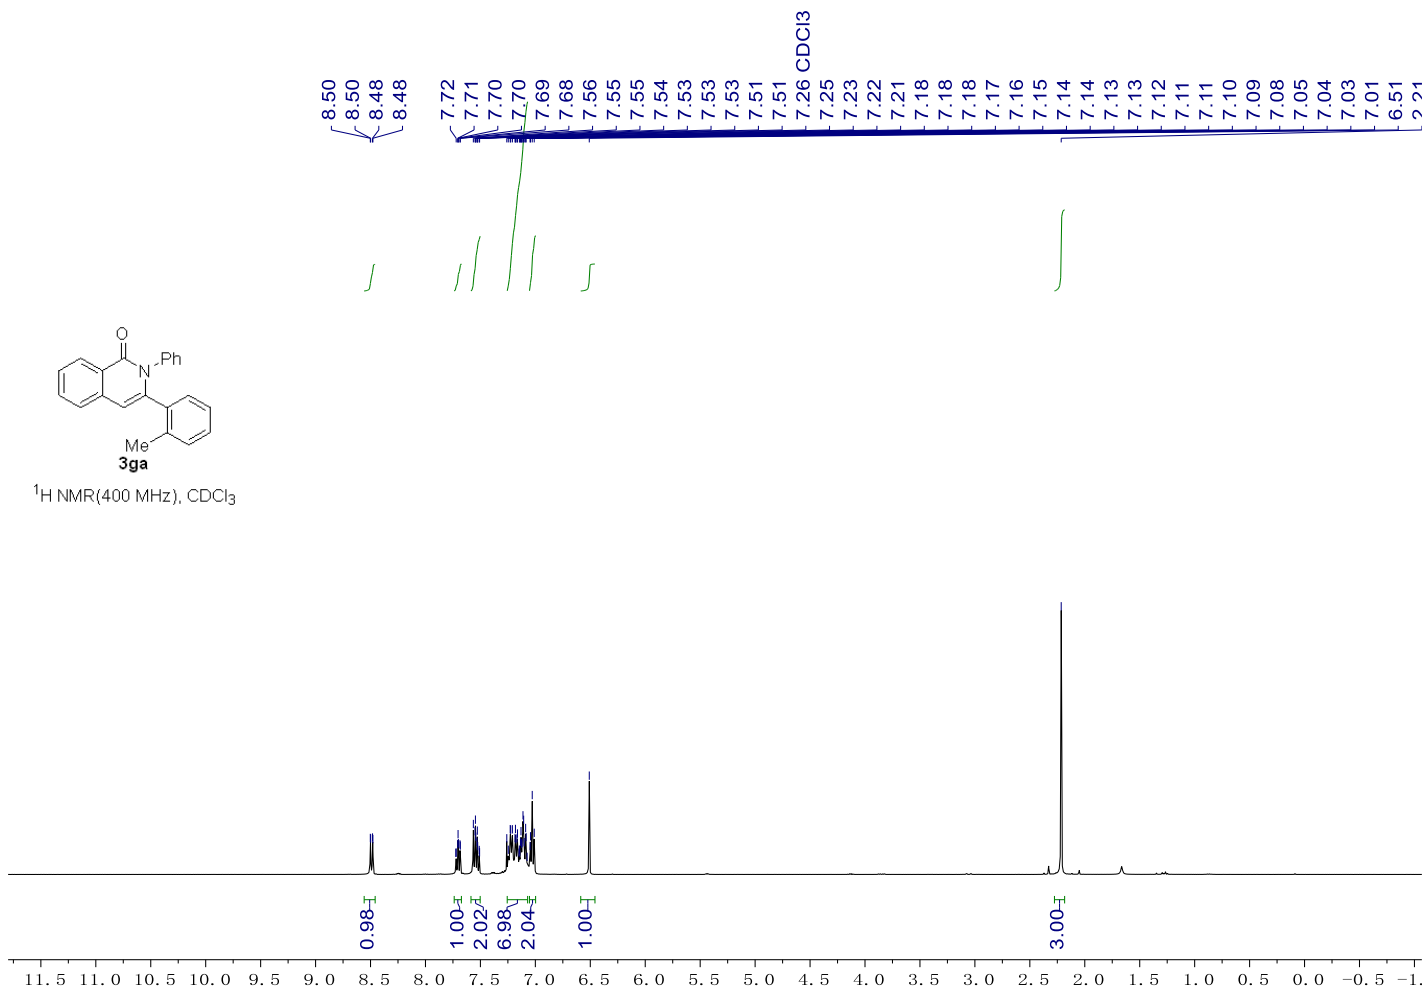

**<sup>13</sup>C NMR of 2-phenyl-3-(*o*-tolyl)isoquinolin-1(2*H*)-one (3ga)**

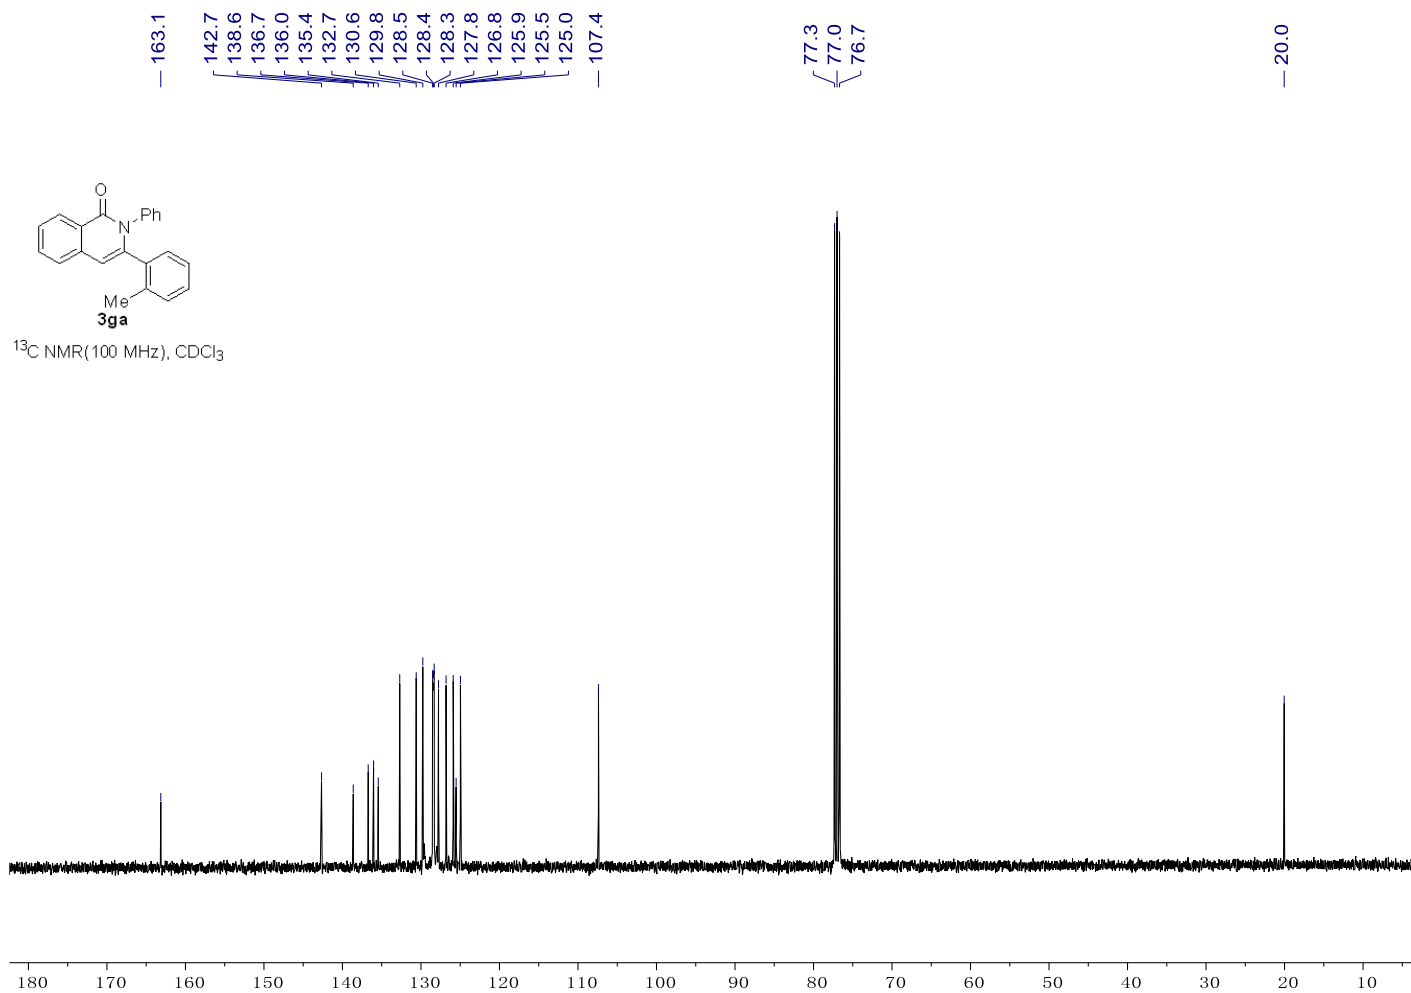

**<sup>1</sup>H NMR of 3-(2-chlorophenyl)-2-phenylisoquinolin-1(2H)-one (3ha)**

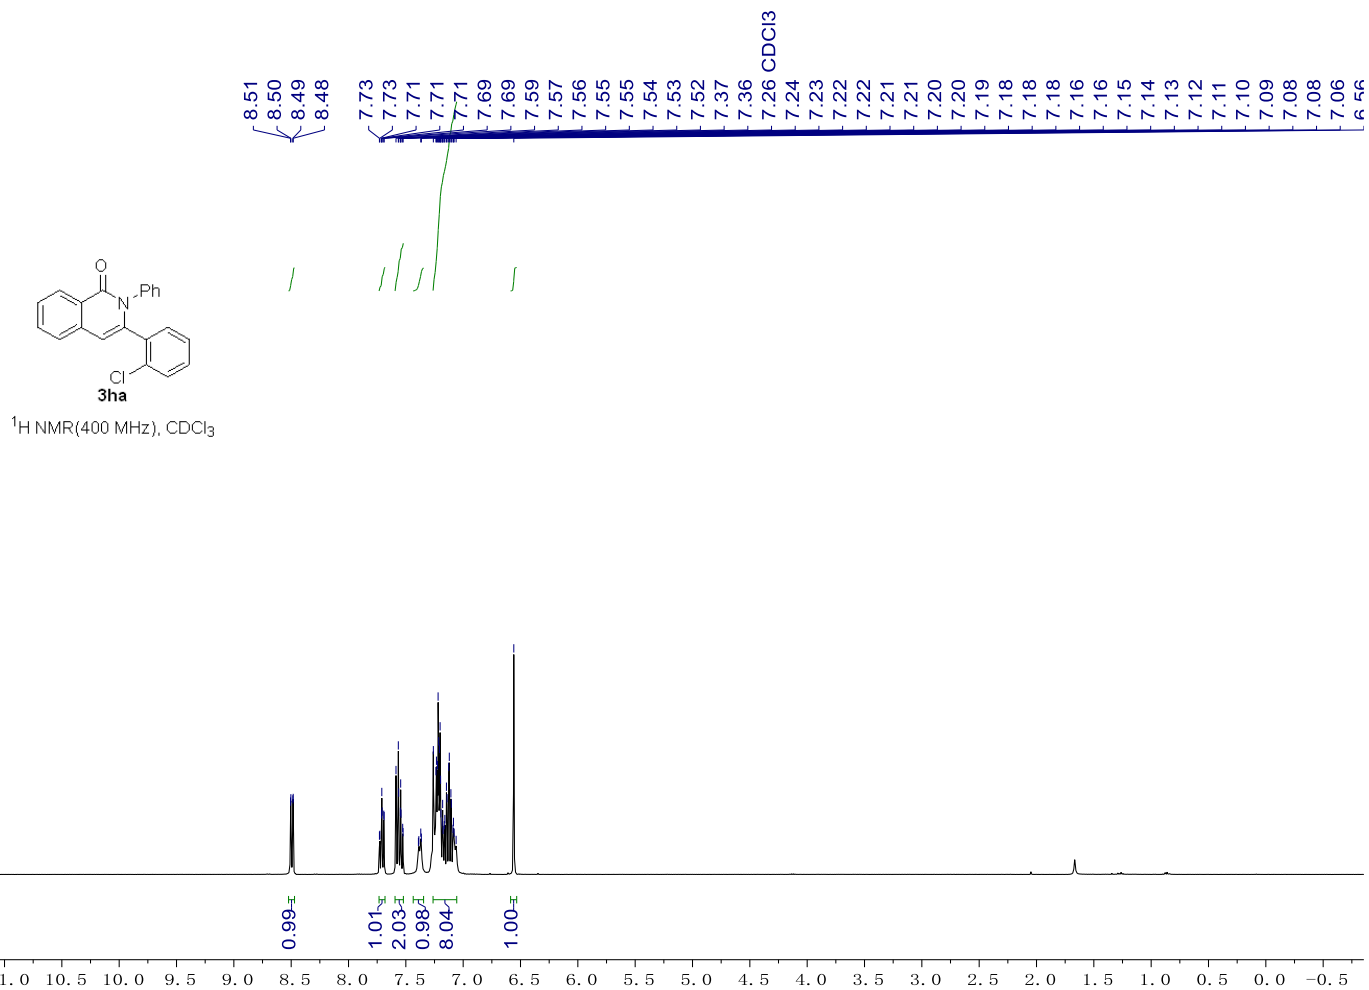



**<sup>13</sup>C NMR of 3-(2-chlorophenyl)-2-phenylisoquinolin-1(2H)-one (3ha)**

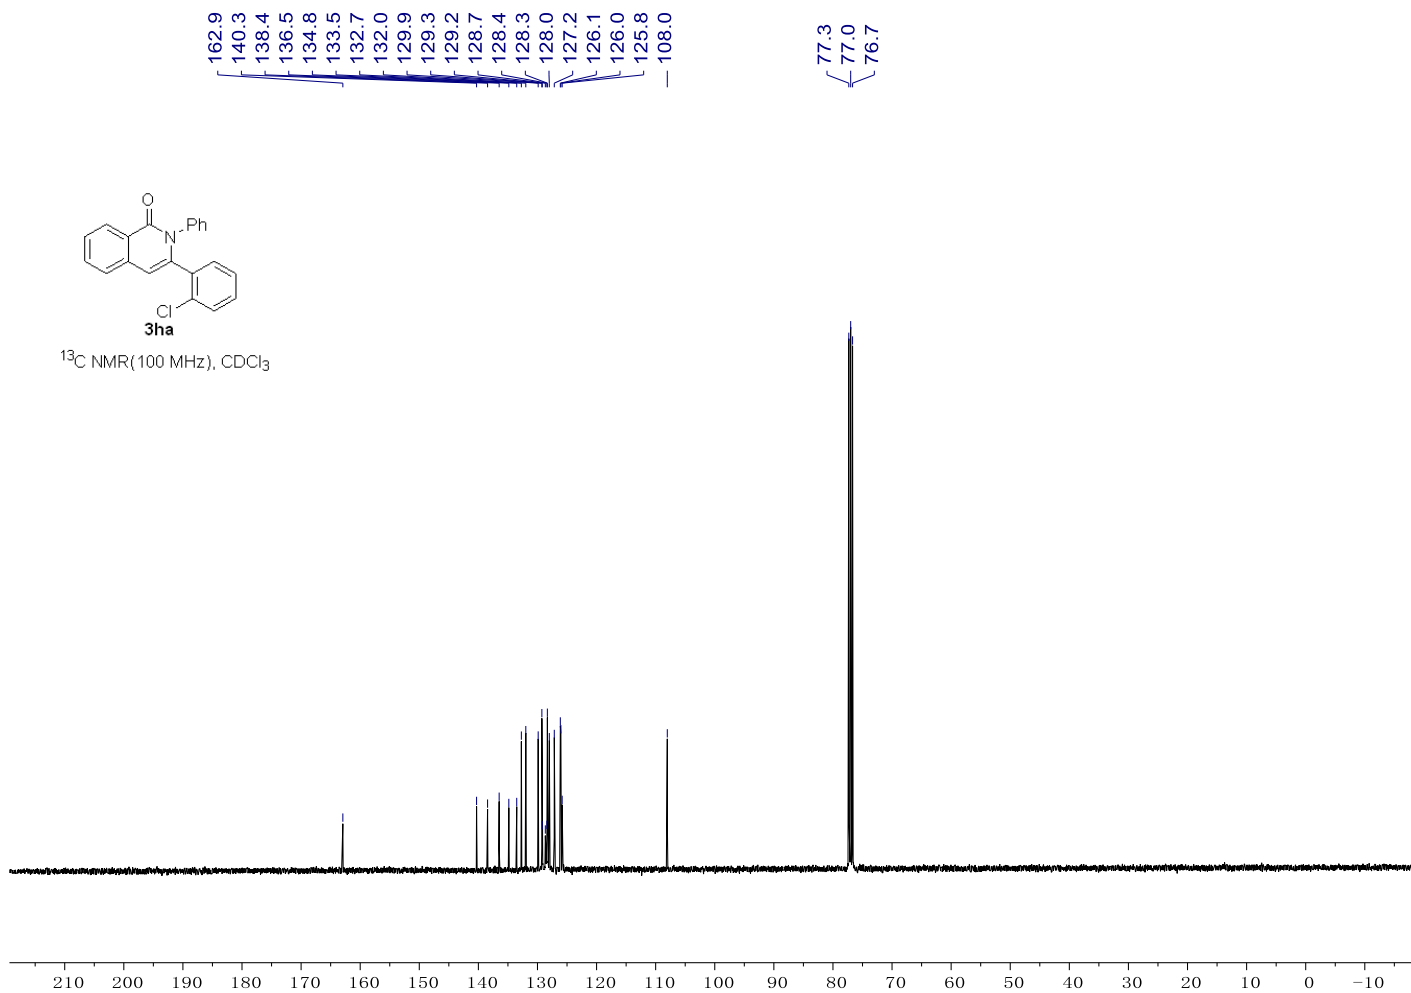

**<sup>1</sup>H NMR of 3-(3-chlorophenyl)-2-phenylisoquinolin-1(2H)-one (3ia)**

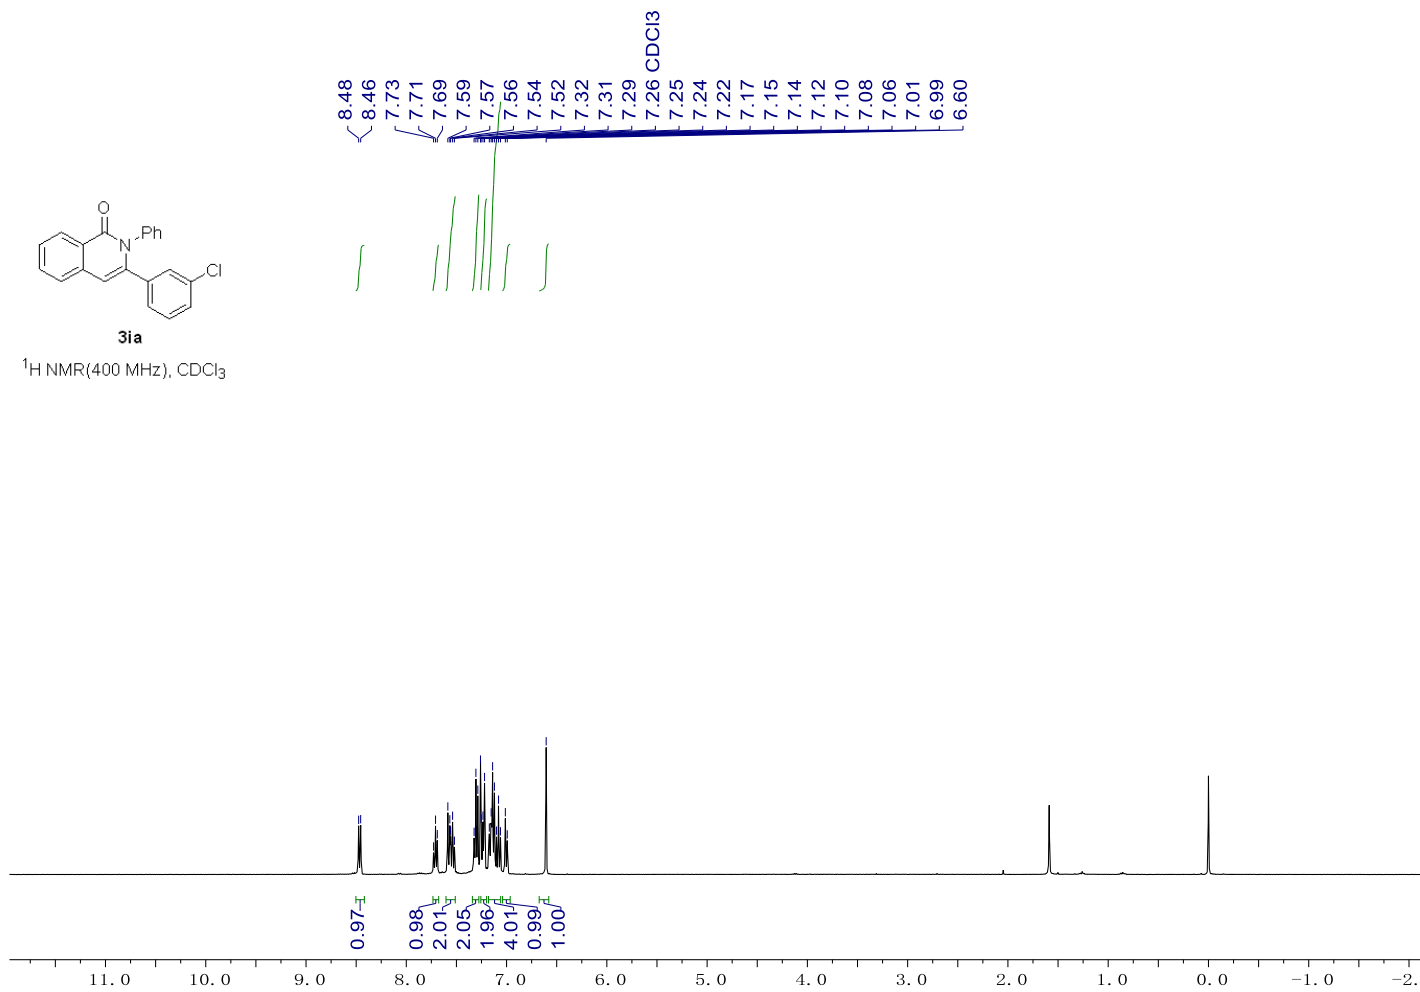

**<sup>13</sup>C NMR of 3-(3-chlorophenyl)-2-phenylisoquinolin-1(2H)-one (3ia)**

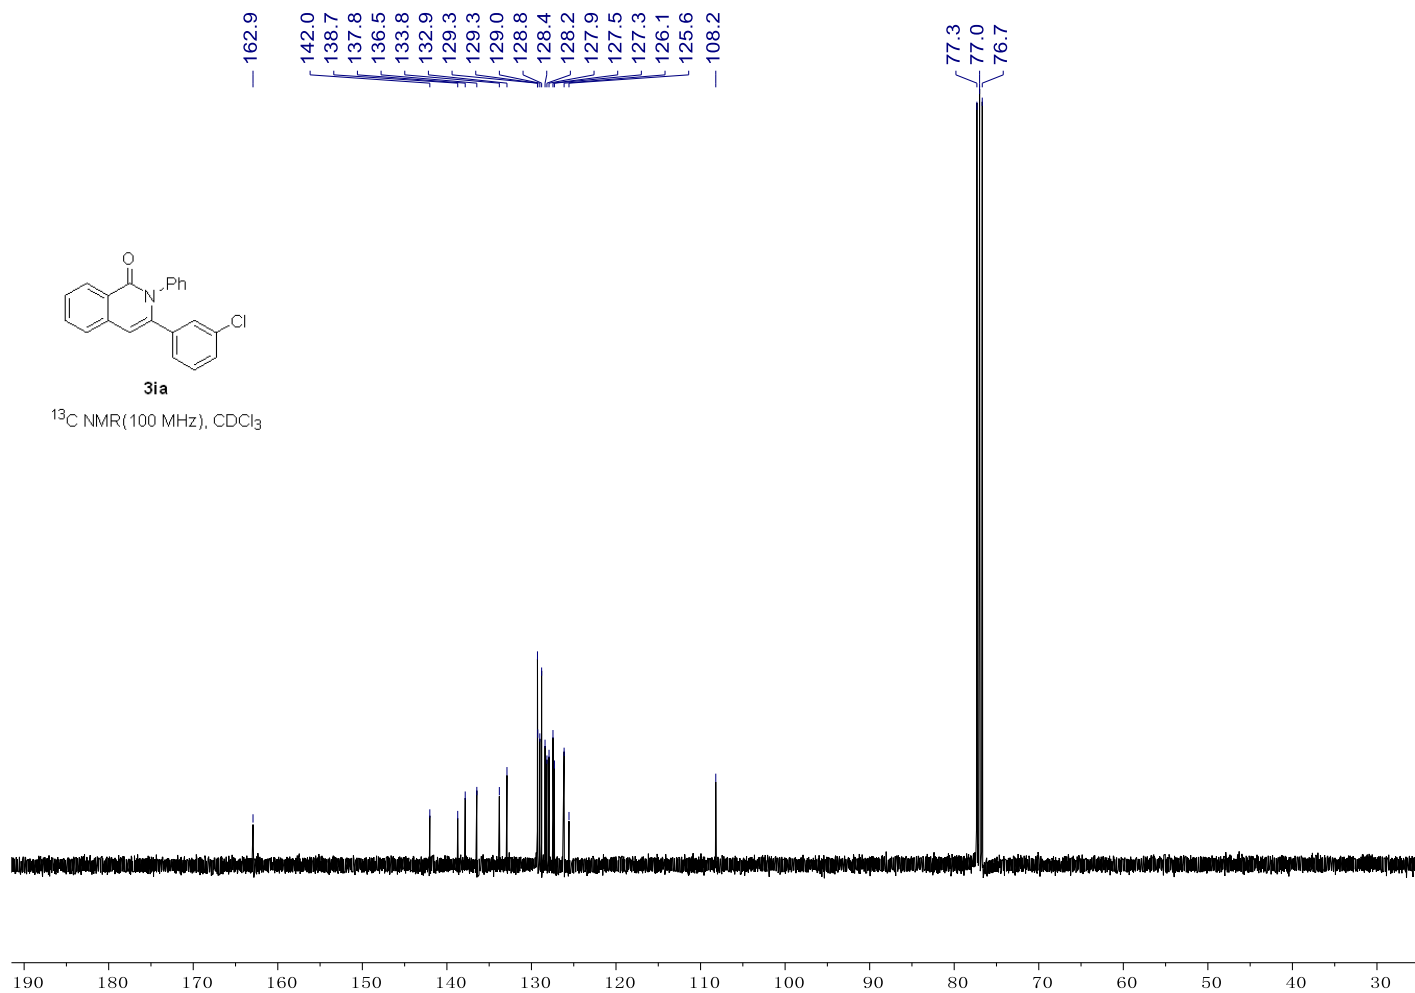

**<sup>1</sup>H NMR of 3-(3-bromophenyl)-2-phenylisoquinolin-1(2H)-one (3ja)**

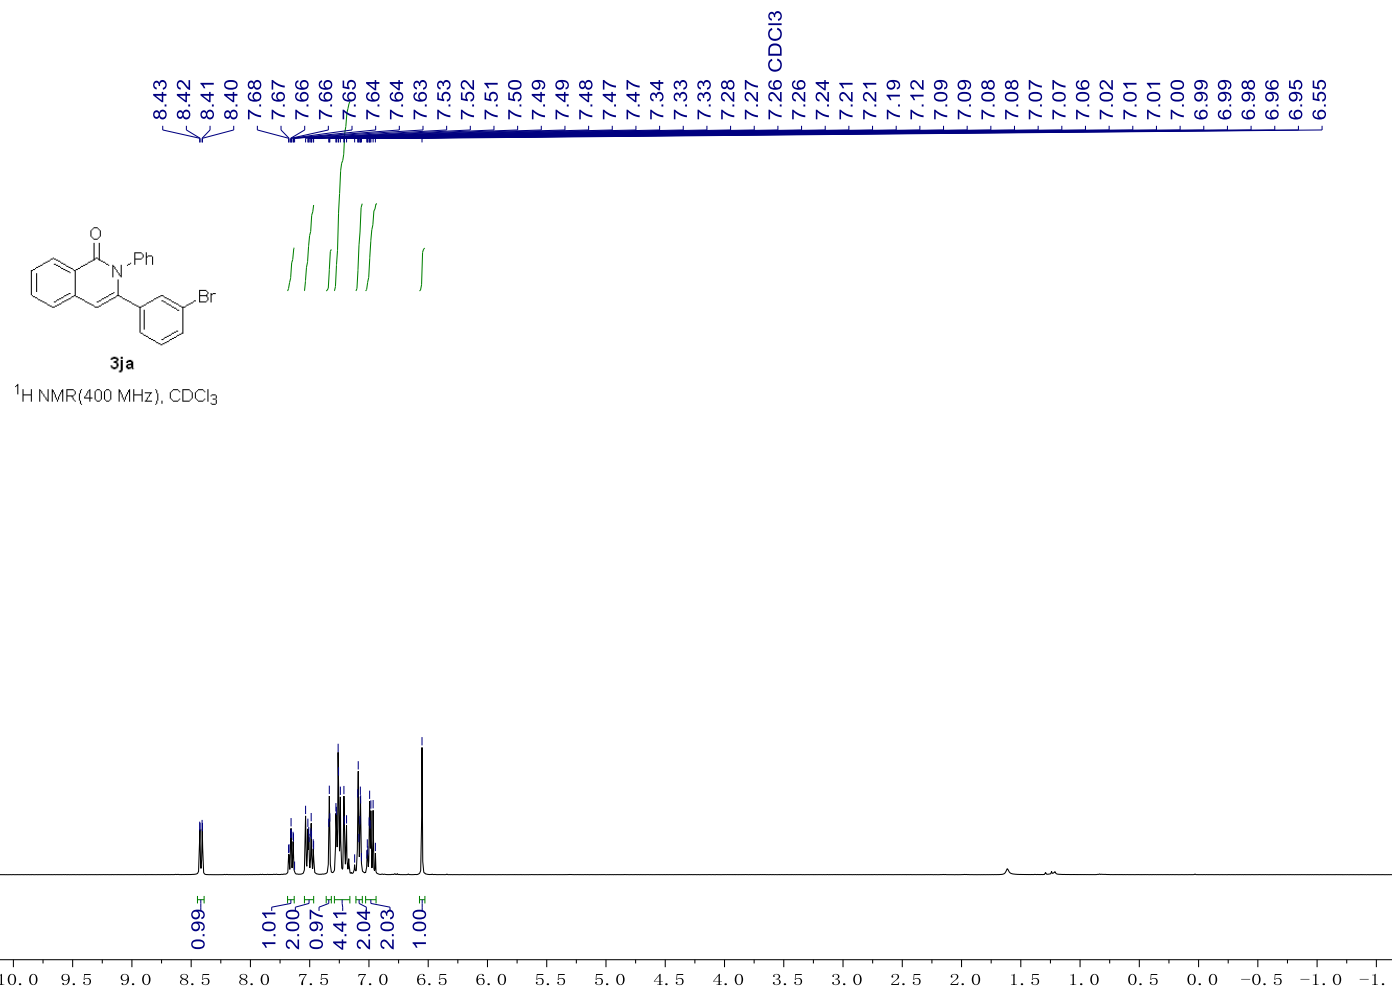

**<sup>13</sup>C NMR of 3-(3-bromophenyl)-2-phenylisoquinolin-1(2H)-one (3ja)**

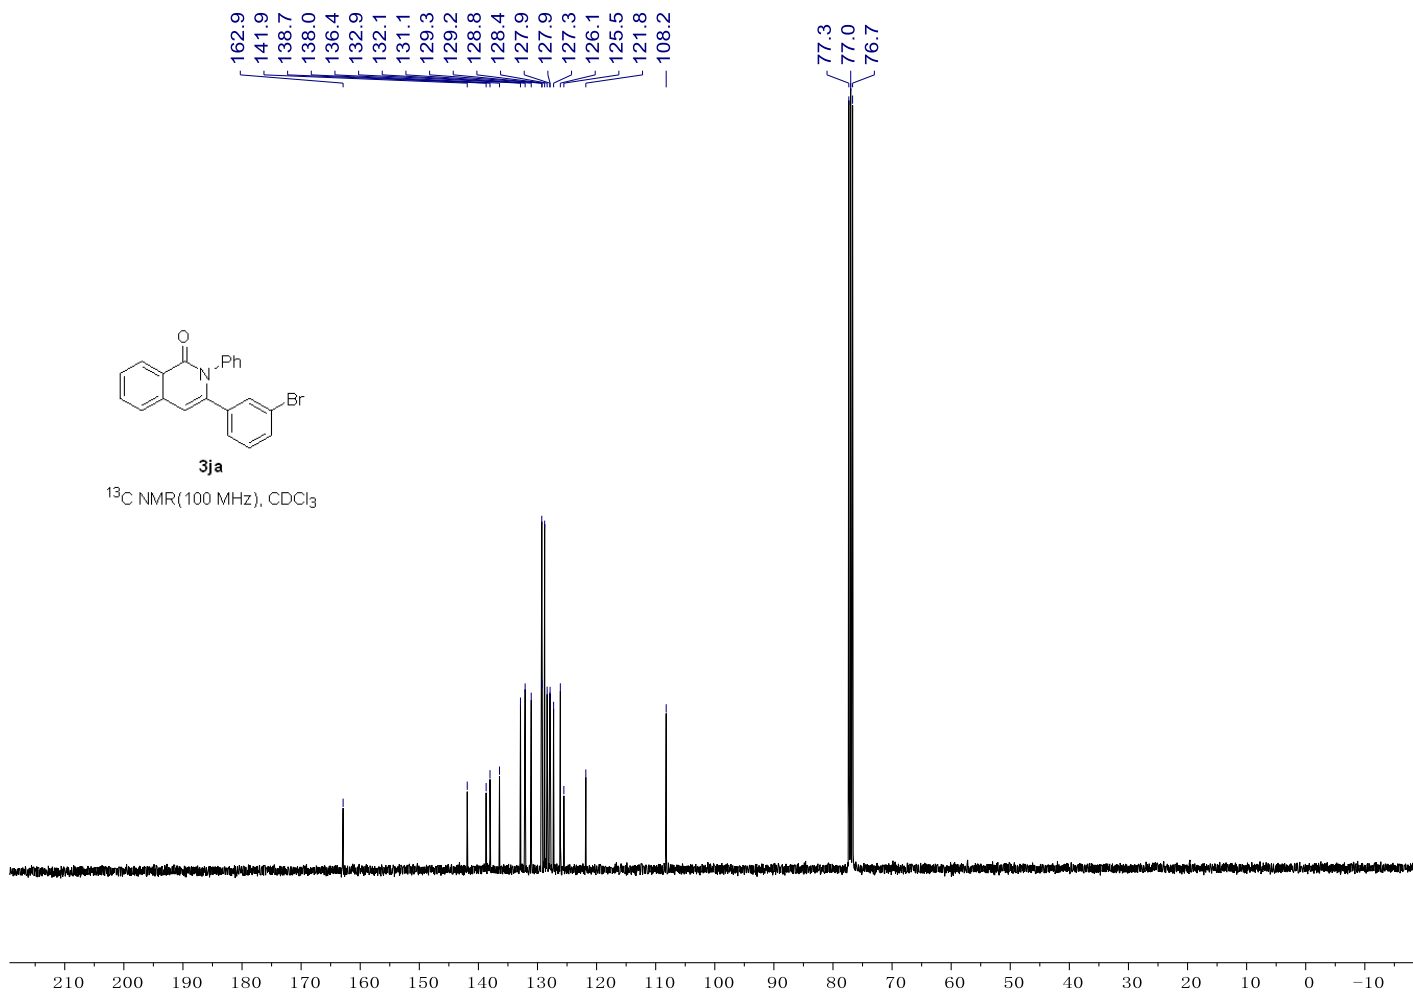

**<sup>1</sup>H NMR of 2-phenyl-3-(*m*-tolyl)isoquinolin-1(2*H*)-one (3ka)**

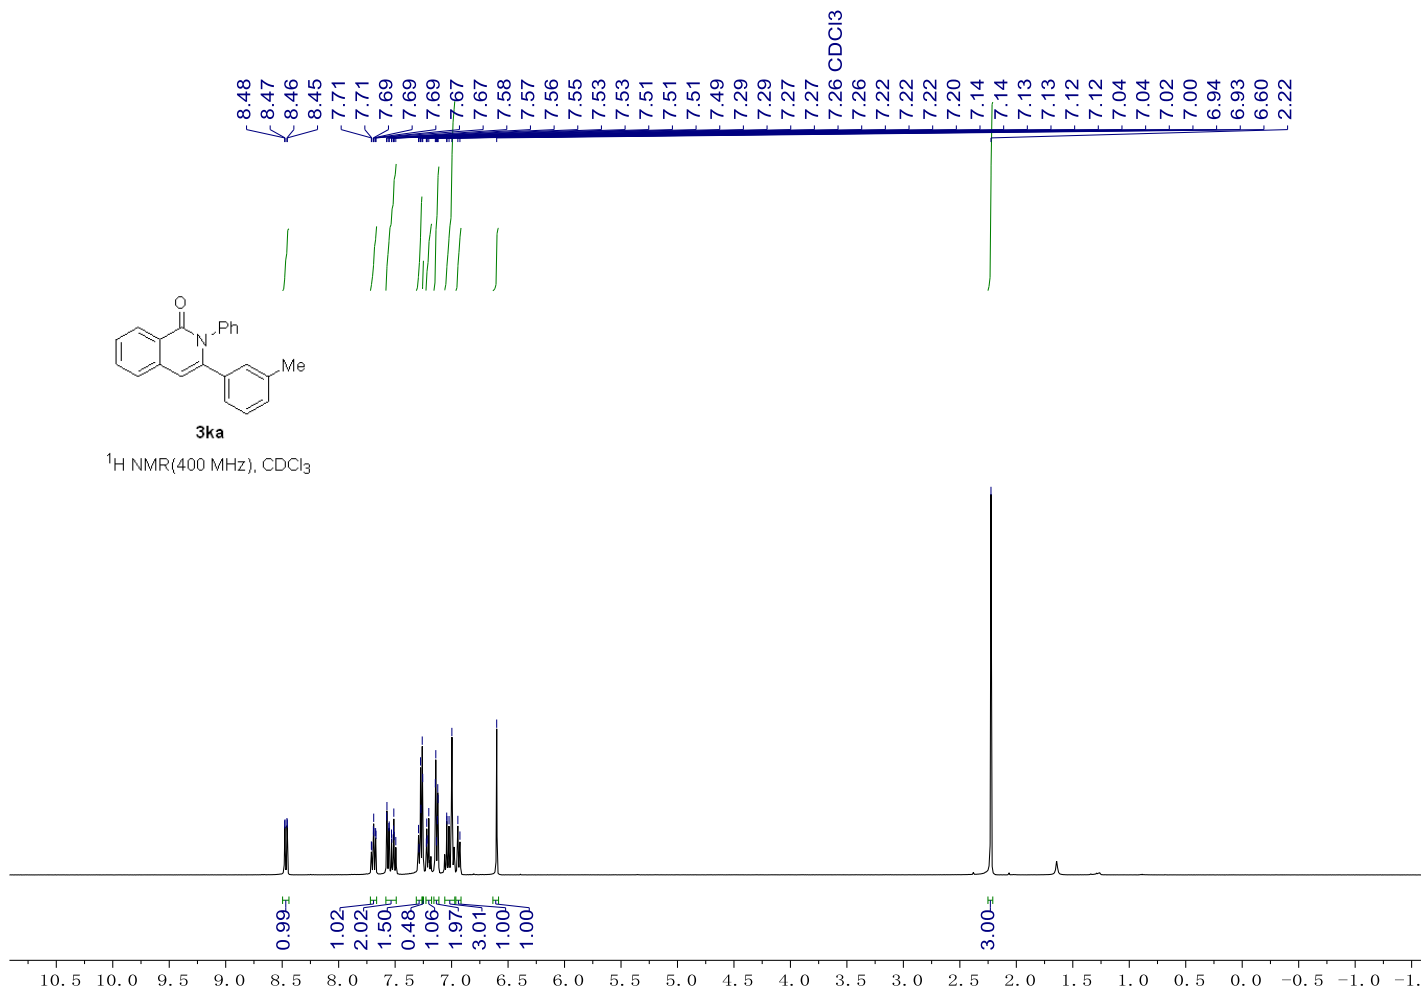

**<sup>13</sup>C NMR of 2-phenyl-3-(*m*-tolyl)isoquinolin-1(2*H*)-one (3ka)**

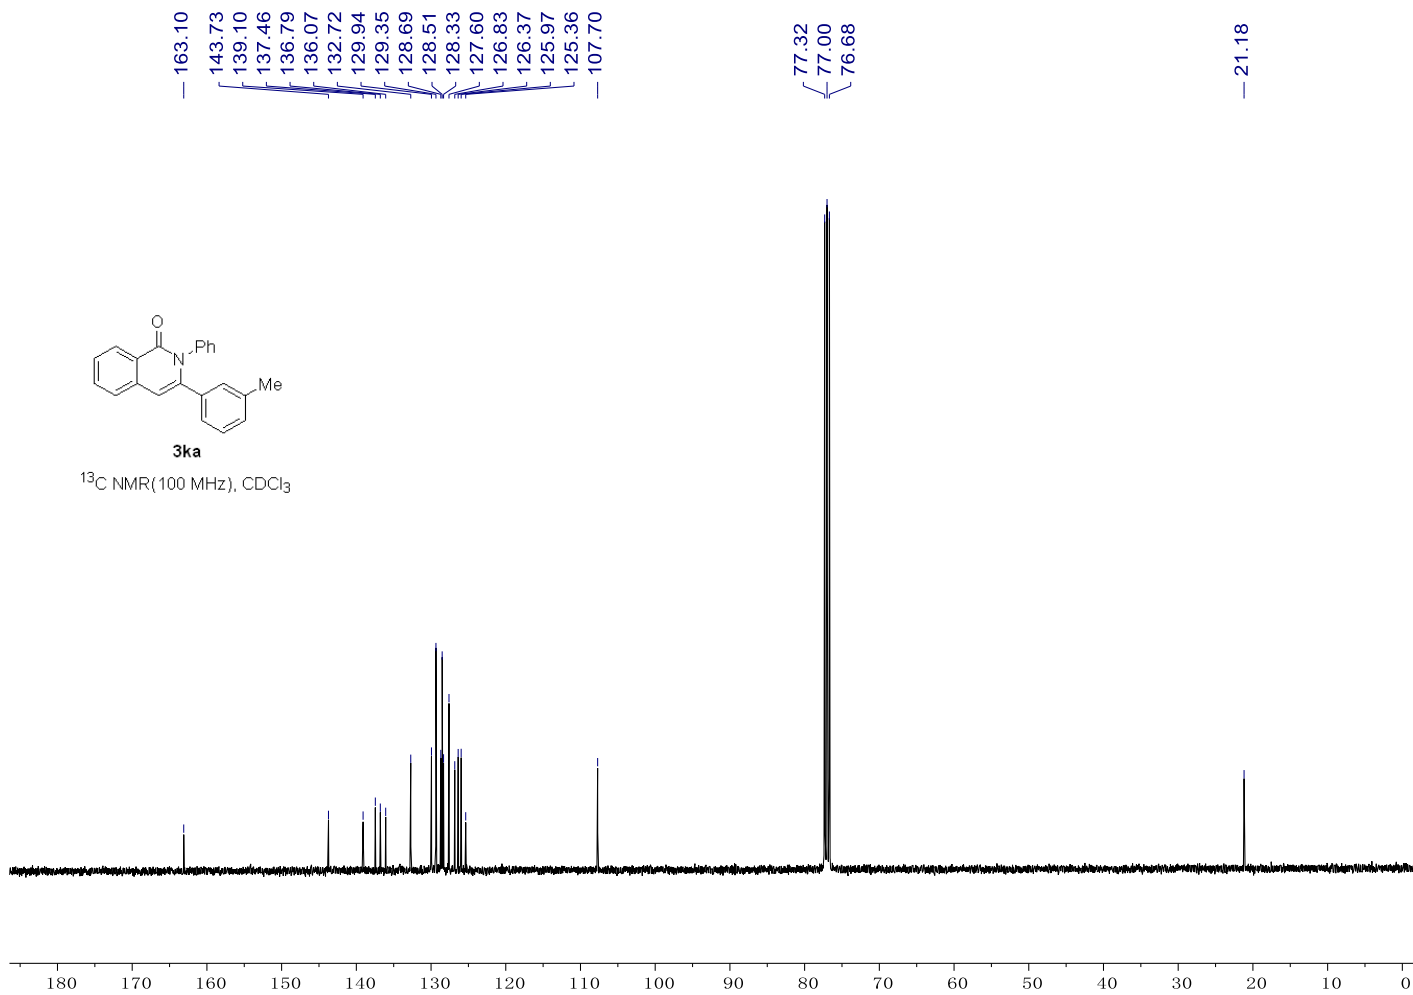

**<sup>1</sup>H NMR of 3-(naphthalen-2-yl)-2-phenylisoquinolin-1(2H)-one (3la)**

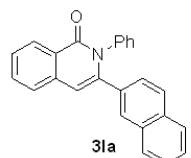

<sup>1</sup>H NMR(400 MHz), CDCl<sub>3</sub>

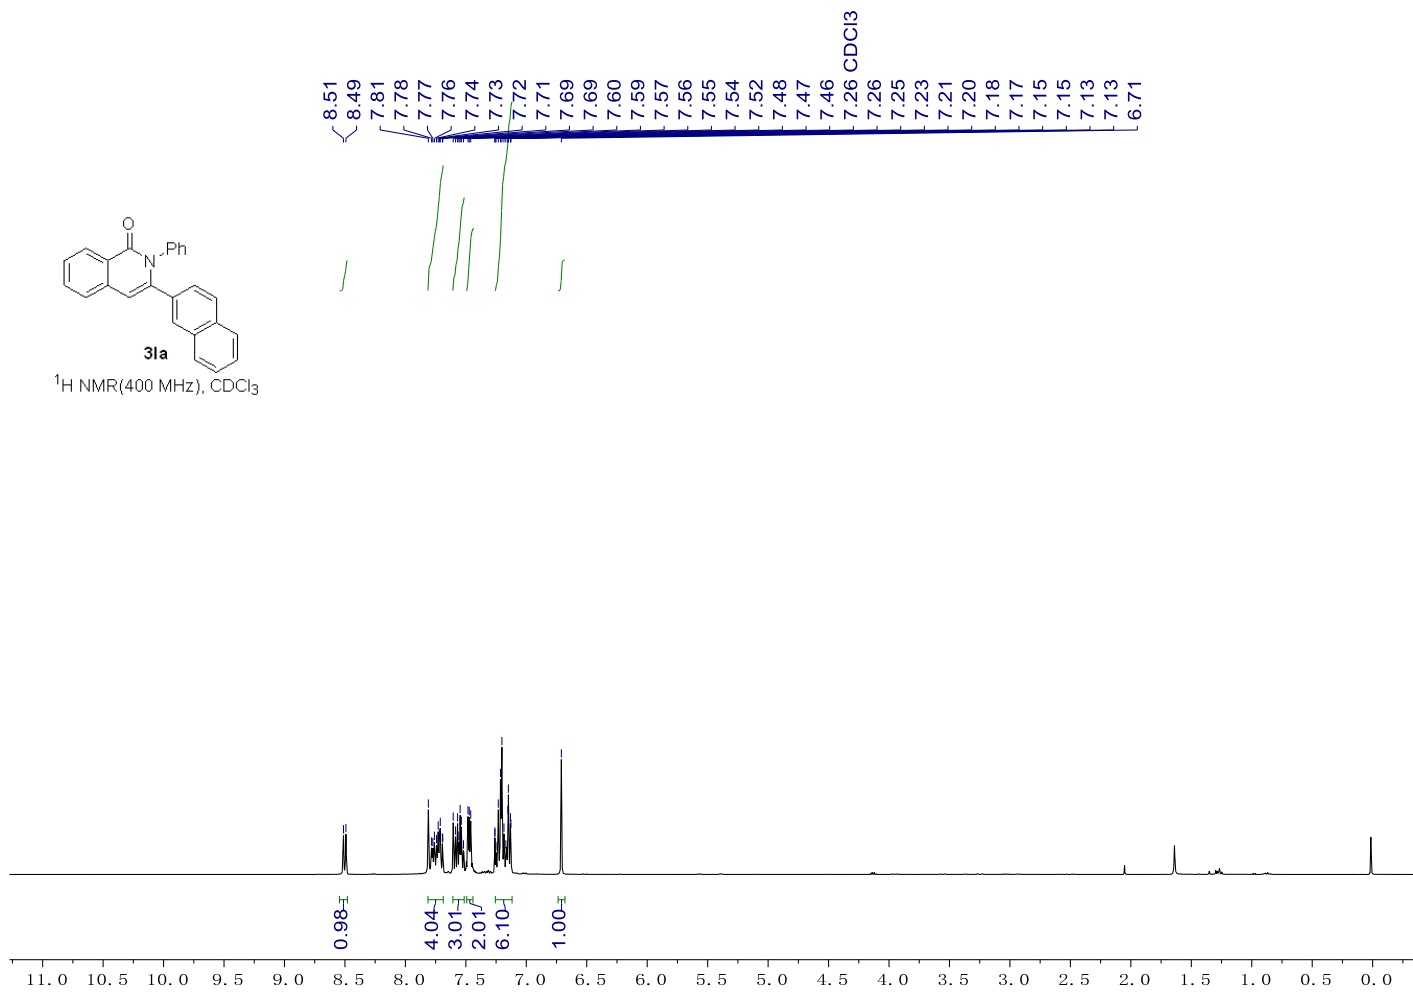



**<sup>13</sup>C NMR of 3-(naphthalen-2-yl)-2-phenylisoquinolin-1(2H)-one (3la)**

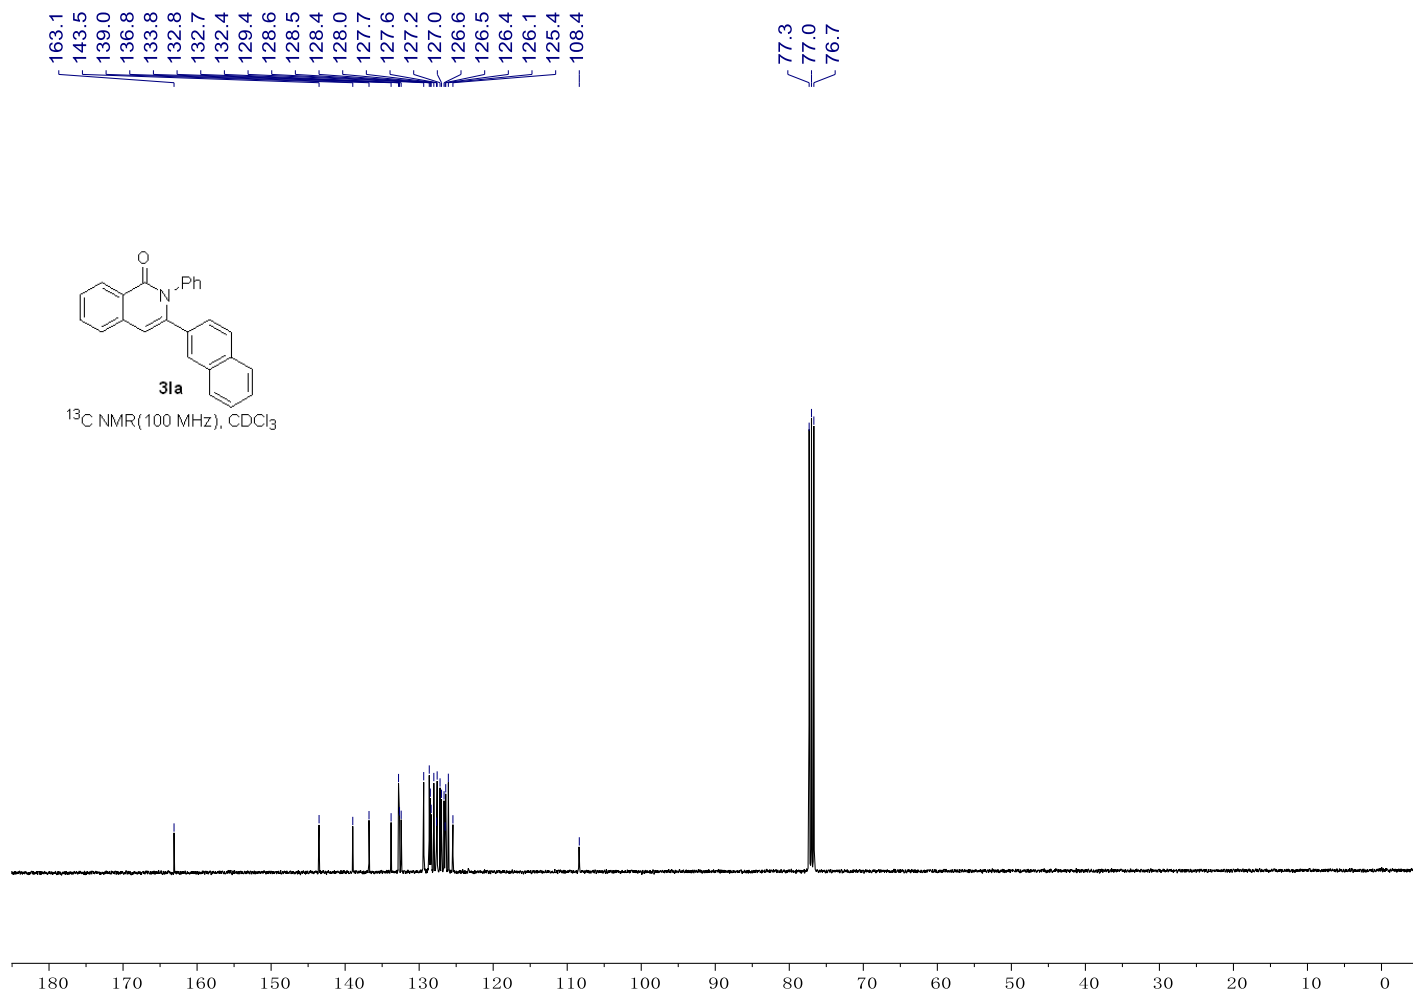

**<sup>1</sup>H NMR of 2-phenyl-3-(pyridin-3-yl)isoquinolin-1(2H)-one (3na)**

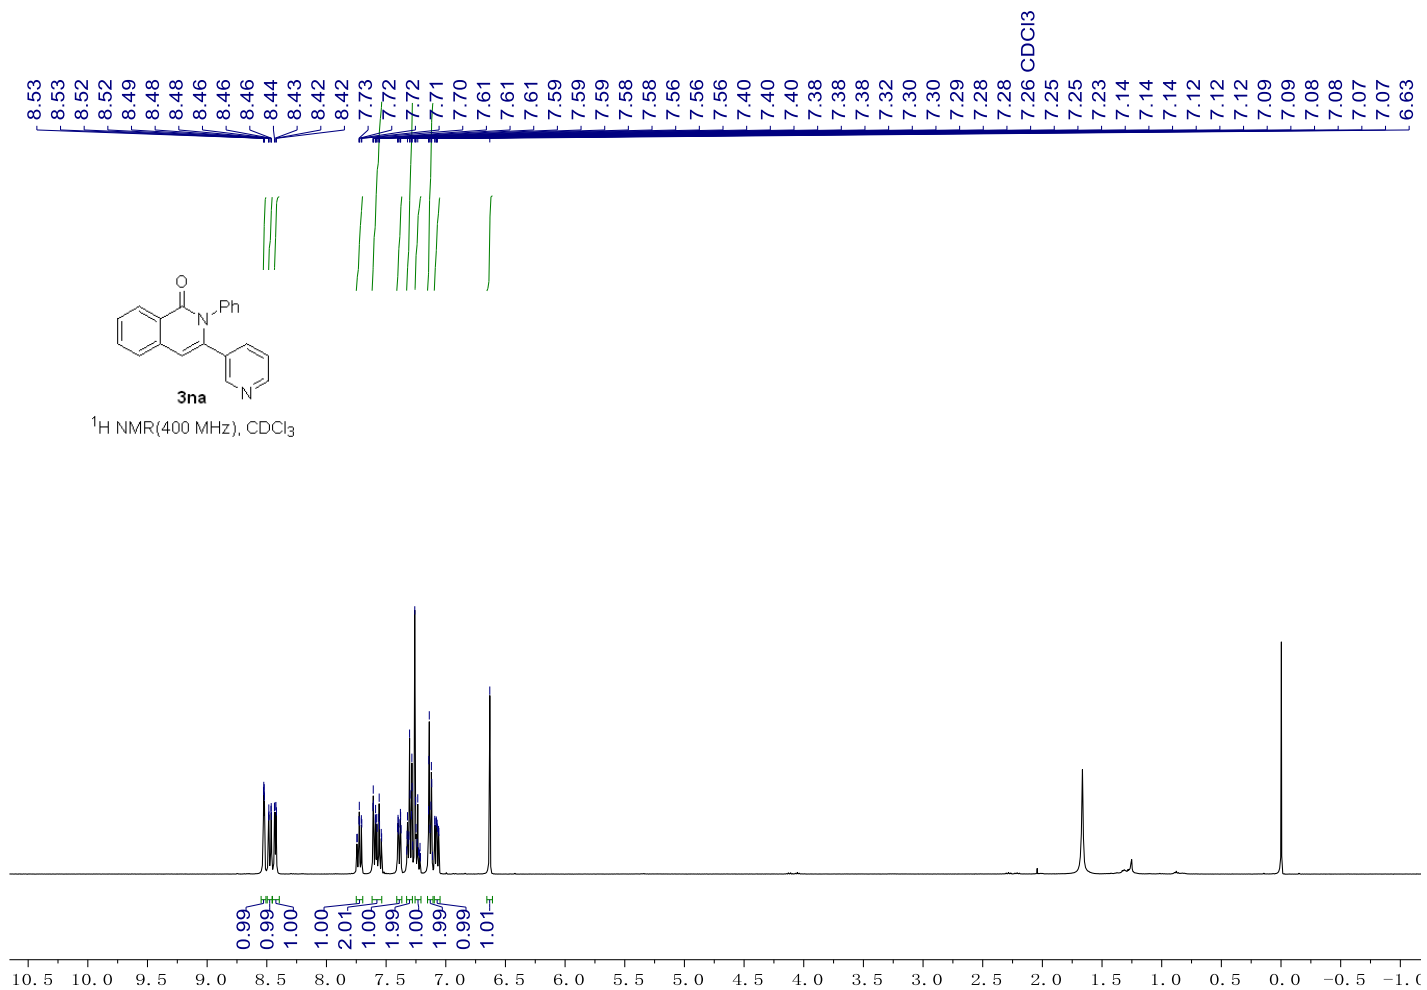

**<sup>13</sup>C NMR of 2-phenyl-3-(pyridin-3-yl)isoquinolin-1(2H)-one (3na)**

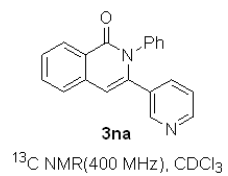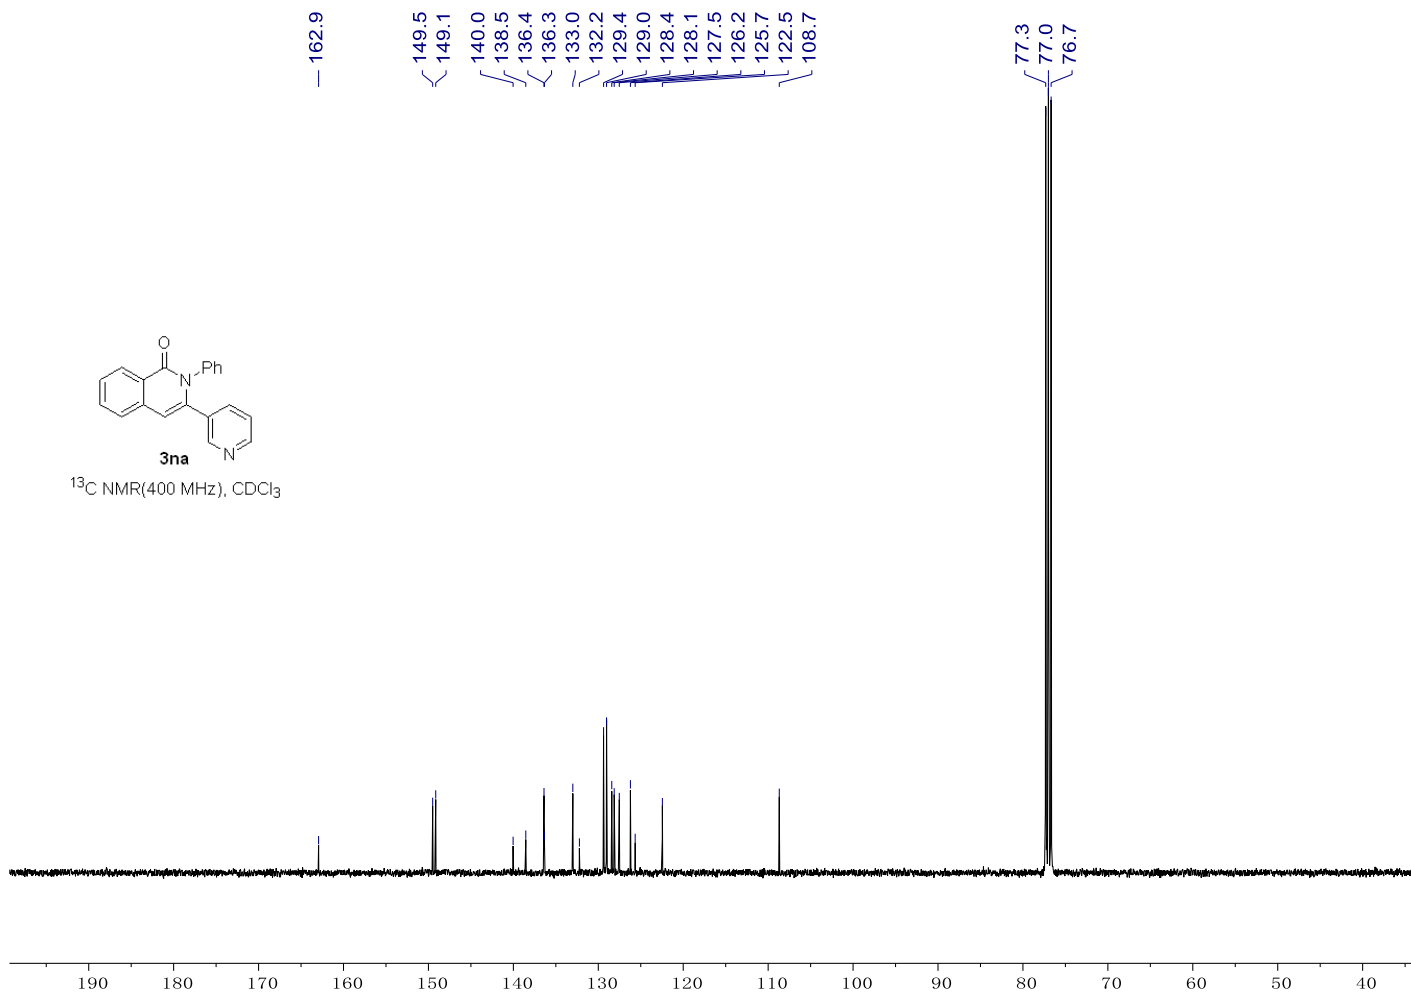

**<sup>1</sup>H NMR of 2-phenyl-3-(thiophen-2-yl)isoquinolin-1(2H)-one (3oa)**

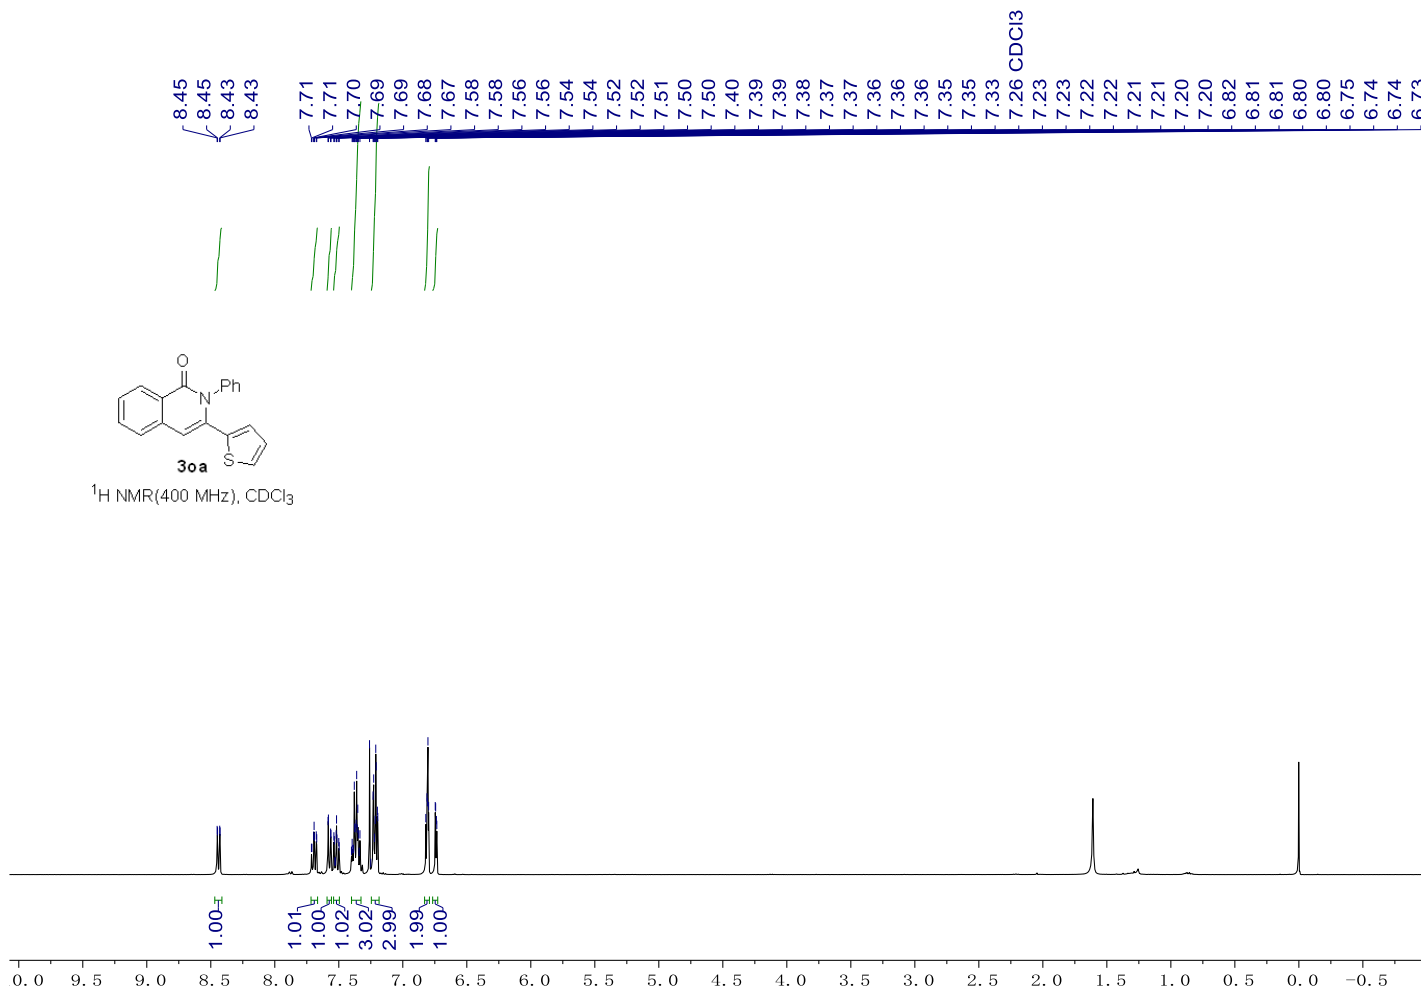

**<sup>13</sup>C NMR of 2-phenyl-3-(thiophen-2-yl)isoquinolin-1(2H)-one (3oa)**

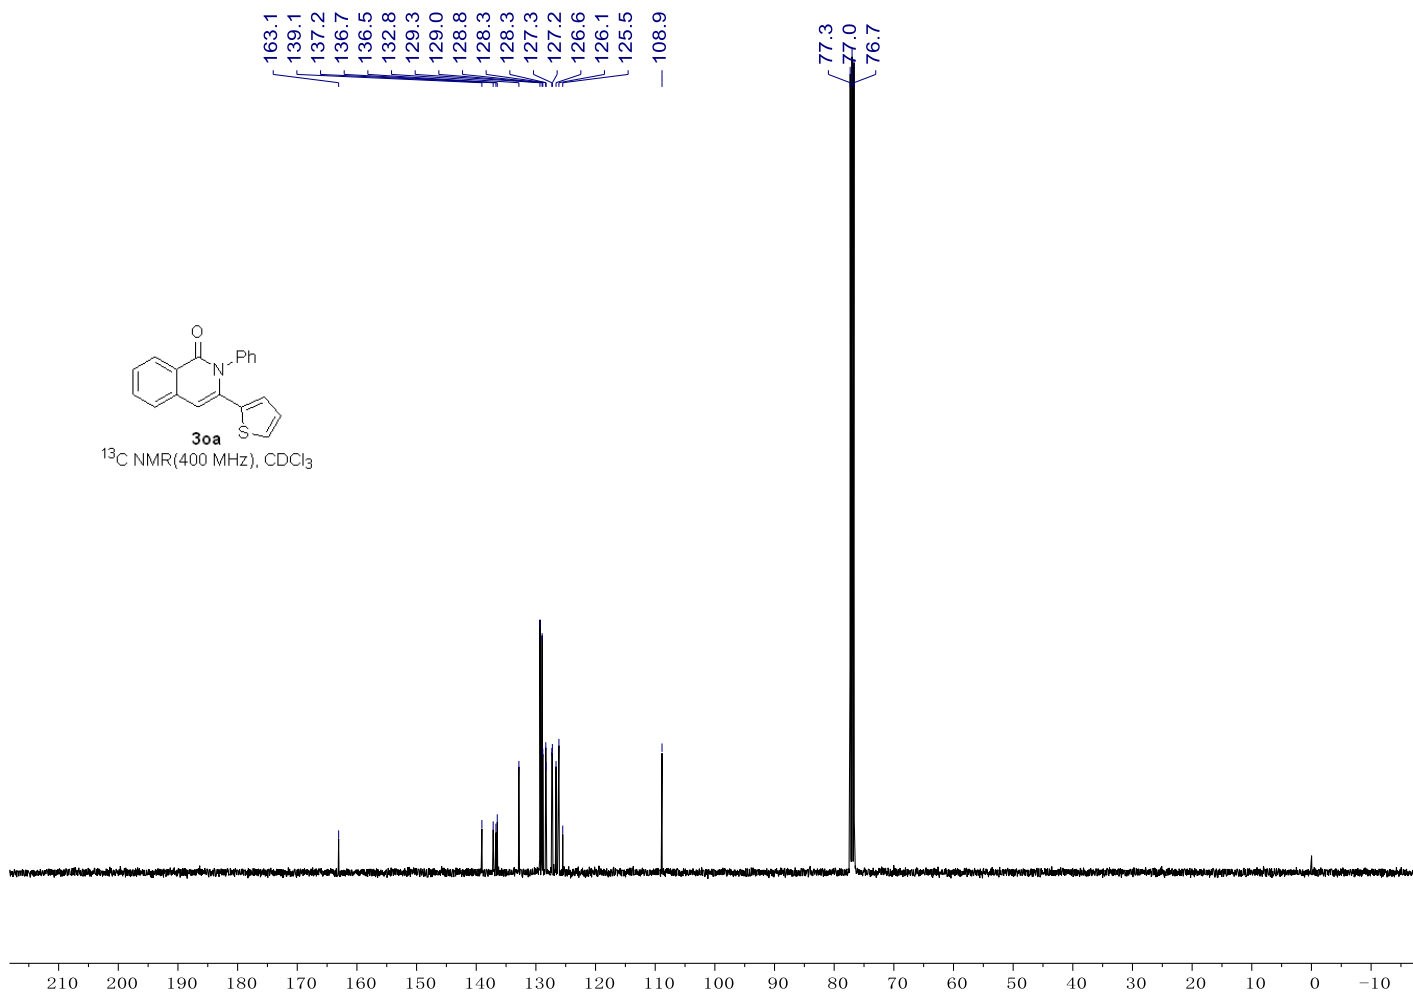

Supplement: d3ob01161e1.pdf [file d3ob01161e1.pdf]
